## Probing small ribosomal subunit RNA helix 45 acetylation across eukaryotic evolution

Bortolin-Cavaillé Marie-Line<sup>(1)</sup>, Quillien Aurélie<sup>(1)(#)</sup>, Thalalla Gamage Supuni<sup>(2)(#)</sup>, Thomas Justin M.<sup>(2)</sup>, Sas-Chen Aldema<sup>(4)(5)</sup>, Sharma Sunny<sup>(3)(6)</sup>, Plisson-Chastang Célia<sup>(1)</sup>, Vandel Laurence<sup>(1)(7)</sup>, Blader Patrick<sup>(1)</sup>, Lafontaine Denis L.J.<sup>(3)</sup>, Schwartz Schraga<sup>(4)</sup>, Meier Jordan L.<sup>(2)</sup> and Cavaillé Jérôme<sup>(1)(\*)</sup>

<sup>(1)</sup> Molecular, Cellular and Developmental Biology unit (MCD), Centre de Biologie Intégrative (CBI), University of Toulouse; UPS; CNRS; 118 route de Narbonne, 31062 Toulouse, France

<sup>(2)</sup> Chemical Biology Laboratory, National Cancer Institute, Frederick, Maryland 21702, United States.

<sup>(3)</sup> RNA Molecular Biology, Fonds National de la Recherche Scientifique (FRS/FNRS), Université Libre de Bruxelles (ULB), B-6041 Gosselies, Belgium.

<sup>(4)</sup> Department of Molecular Genetics, Weizmann Institute of Science, Rehovot, Israel.

<sup>(5)</sup> Present address: The Shmunis School of Biomedicine and Cancer Research, The George S. Wise Faculty of Life Sciences, Tel Aviv University.

<sup>(6)</sup> Present address: Department of Cell Biology and Neurosciences, Rutgers, The State University of New Jersey, Piscataway, NJ-08904.

<sup>(7)</sup> Present address: Université Clermont Auvergne, CNRS, INSERM, iGReD, Clermont-Ferrand, France

(\*) Corresponding author: [Jerome.cavaille@univ-tlse3.fr](mailto:Jerome.cavaille@univ-tlse3.fr); tel +33(0)561335927; fax: +33(0)561335886

(#) equally contribution

## Abstract

NAT10 is an essential enzyme that catalyzes the formation of N<sup>4</sup>-acetylcytidine (ac<sup>4</sup>C) in eukaryotic transfer RNA (tRNA) and 18S ribosomal RNA (rRNA). Recent studies in human cells suggested that rRNA acetylation is dependent on SNORD13, a non-canonical box C/D small nucleolar RNA (SNORD) predicted to base-pair with 18S rRNA via two antisense elements. However, the selectivity of SNORD13-dependent cytidine acetylation and its relationship to NAT10's essential function in pre-rRNA processing remain to be defined. Here, we used CRISPR-Cas9 genome editing to formally demonstrate that SNORD13 is required for acetylation of a single cytidine residue of human and zebrafish 18S rRNA. In-depth characterization revealed that SNORD13-dependent ac<sup>4</sup>C is dispensable for yeast or human cell growth, ribosome biogenesis, translation, and the development of multicellular metazoan model organisms. This loss of function analysis inspired a cross-evolutionary survey of the eukaryotic rRNA acetylation 'machinery' that led to the characterization of many novel SNORD13 genes in phylogenetically-distant metazoans and more deeply rooted photosynthetic organisms. This includes an atypical SNORD13-like RNA in *D. melanogaster* which appears to guide ac<sup>4</sup>C to 18S rRNA helix 45 despite lacking one of the two rRNA antisense elements. Finally, we discover that *C. elegans* 18S rRNA is not acetylated despite the presence of an essential NAT10 homolog. Altogether, our findings shed light on the molecular mechanisms underlying SNORD13-mediated rRNA acetylation across the eukaryotic tree of life and raise new questions regarding the biological function and evolutionary persistence of this highly conserved rRNA base modification.

## Introduction

N4-acetylcytidine (ac<sup>4</sup>C) in eukaryotic and archaeal rRNA was first documented in the 1970's, but the catalytic machinery and specific sites of this base modification have been defined only recently (1,2). In eukaryotes, ac<sup>4</sup>C occurs at two positions within rRNA (helix 34 and 45) where it is catalyzed by the nucleolar GCN5-related RNA acetyltransferase NAT10, also referred to as Kre33 or Rra1 in yeast (3-5). In addition, recent studies showed that certain archaeal species harbour >100 ac<sup>4</sup>C residues in their rRNA, including at helix 45, placing cytidine acetylation on par with prevalent nucleoside modifications such as pseudouridines and 2'-O-methylations in these organisms (6,7). Beside its involvement in rRNA modification, NAT10/Kre33 (assisted by its specific co-factor THUMP1/Tan1) can modify C12 of serine and leucine tRNAs (5,8) and has been suggested to modify eukaryotic mRNAs (9,10). Orthogonal validation has, however, called into question the involvement of NAT10 in mRNA modification (6). In addition to modifying RNA, NAT10 may also be implicated in protein acetylation (11-13). Moreover, NAT10 is essential for pre-rRNA processing reactions leading to synthesis of 18S rRNA (5), and unsurprisingly it was associated with human diseases (14,15). The importance of helix 45 ac<sup>4</sup>C for cell homeostasis has not been addressed.

In yeast, the ability of Kre33 to specifically acetylate 18S rRNA was demonstrated to rely on two box C/D small nucleolar RNAs (SNORD), namely snR4 and snR45, which form imperfect base pairing interactions surrounding the targeted cytidine. Indeed, knockout of snR4 and snR45 led to the specific disappearance of 18S rRNA acetylation at SSU-C1280 (helix 34) and SSU-C1773 (helix 45), respectively, while leaving tRNA acetylation unaffected (16). SNORDs are associated with four core proteins (SNU13, NOP56, NOP58, and Fibrillarin) and form nucleolar ribonucleoprotein (RNP) complexes known to mediate site-specific ribose methylation of rRNA, U6 spliceosomal snRNA and tRNAs; some of them are also involved in early nucleolar pre-

rRNA processing (17). The possible contribution of snoRNA-associated proteins in rRNA acetylation remains undefined. Of note, SNORD13 (formerly U13) displays two rRNA complementarity tracts reminiscent of those present on snR45 (**Figure 1**), strongly implicating it as a human counterpart (5,18). Consistent with this notion, inhibiting SNORD13 expression in a cancer cell line using antisense oligonucleotides causes a ~50% decrease in levels of ac<sup>4</sup>C in 18S rRNA (5). However, the nucleotide-specificity of this inhibition and the residual level of acetylation did not afford to easily assess the impact of the modification on cell growth or ribosome biogenesis. Finally, three SNORD13-like RNA species were also reported in *A. thaliana* (snoR105, snoR108 and snoR146) but their roles in rRNA acetylation still awaits investigation (19).

Outside their potential to form two imperfect base-pairing interactions with 18S rRNA, vertebrate SNORD13 and its *S. cerevisiae* and *A. thaliana* homologs are not highly conserved. This explains why, although SNORD13 was discovered thirty years ago (18,20), its relationship with snR45 was only recognized recently (16). This suggests two distinct evolutionary hypotheses: either SNORD-mediated rRNA acetylation emerged early in a common ancestor of plants, fungi and animals and diverged thereafter, or alternatively, SNORD13 arose independently in these different lineages via convergent evolution. Irrespective of the scenario, the possibility also exists that SNORD13 has been lost in some lineages and, accordingly, helix 45 acetylation may rely on a stand-alone enzyme, or no longer be present in rRNA in certain species. This poses the question as to how SNORD-guided cytidine acetylation is conserved across the eukaryotic tree of life, and what cross-organismal commonalities in the nucleic acid acetylation machinery and its rRNA substrates govern this process.

Here, we use CRISPR-Cas9 genome editing to delete SNORD13 in human cells, confirming the hypothesis that this snoRNA is specifically required for acetylation of a single cytidine residue in

small subunit ribosomal RNAs (SSU-ac<sup>4</sup>C1842 located in rRNA helix45). Using this cell line and related model systems, we further establish that loss of SSU-ac<sup>4</sup>C1842 does not lead to obvious defects in terms of cell growth, protein synthesis, ribosome biogenesis, or the development of metazoan model organisms (zebrafish, flies). Finally, considering that Kre33/NAT10 is essential for pre-rRNA processing (5) while ac<sup>4</sup>C in helix 45 appears dispensable, we surveyed the conservation of the ribosomal RNA acetylation machinery across the eukaryotic tree of life. This cross-evolutionary analysis revealed that SNORD-mediated rRNA acetylation is widely conserved in Metazoans, but defined *C. elegans* as a multicellular organism in which rRNA acetylation has been lost. Our findings illuminate the molecular mechanisms underlying SNORD13-mediated rRNA acetylation across evolution and raise new questions regarding the role of highly conserved SSU-ac<sup>4</sup>C1842.

## Results

**Genetic deletion of human SNORD13 gene causes loss of SSU-ac<sup>4</sup>C1842** - As a first step to probe directly the functional role of SNORD13 in rRNA modification, the human SNORD13 gene was inactivated in the haploid human chronic myelogenous leukemia-derived HAP1 cell line (21). In order to avoid potential transcriptional interference with the adjacent TTI2 gene, the 3'-end region of SNORD13 was targeted for CRISPR-Cas9-mediated deletion (**Figure 2A**). PCR analysis identified three independent SNORD13-deficient clones (#12/#20/#30) harboring the expected deletion (not shown), which rendered SNORD13 undetectable by Northern blot (**Figure 2B**). Three additional clones (#13/#19/#22) were identified that were exposed to CRISPR/Cas9 without any deletion at SNORD13, providing a set of matched control cell lines subjected to identical clonal selection procedures and/or putative off-target effects. Unless otherwise specified, in subsequent experiments SNORD13-KO and WT are used to refer to a

stoichiometric mixture of these three SNORD13-deficient and SNORD13-expressing clones, respectively.

To define the site-specific activity of SNORD13, we took a dual approach to analyze our mutant and WT cell lines. First, we directly measured ac<sup>4</sup>C levels in helix 45 using a mung bean nuclease protection assay coupled to reversed phase high performance liquid chromatography (RP-HPLC, (5)). Briefly, total RNA extracted from SNORD13-KO and WT cells were hybridized with an antisense DNA oligonucleotide overlapping helix 45 and its flanking sequences and were treated with mung bean nuclease. Protected rRNA fragments were then gel-purified and nucleoside hydrolysates obtained after nuclease P1 digestions were subjected to RP-HPLC analysis. As shown in **Figure 2C**, cytosine acetylation at helix 45 was completely abolished in SNORD13-KO cells as compared to WT. As orthogonal validation, RNA isolated from SNORD13-KO and WT cells was analyzed using ac<sup>4</sup>C sequencing chemistry (22). In this approach total RNA is treated with sodium cyanoborohydride under acidic conditions, causing chemical reduction of the acetylated residue. This reduced nucleobase causes misincorporation of non-cognate NTPs during reverse transcription (RT), enabling ac<sup>4</sup>C sites to be detected as C-to-T mutations upon cDNA sequencing. Applying this approach to the two cell lines, we detected SNORD13-dependent misincorporation at SSU-ac<sup>4</sup>C1842 but not at SSU-ac<sup>4</sup>C1337 (**Figure 2D**). These experiments validated our knockout strategy and unambiguously defined SNORD13 as a human counterpart of yeast snR45 required for guiding formation of ac<sup>4</sup>C at the terminal stem-loop of human 18S rRNA.

**SNORD13 deletion does not disrupt cell growth, pre-rRNA processing or protein synthesis in human cells** - Next, we assessed the phenotypic consequences of SNORD13 deletion and/or SSU-ac<sup>4</sup>C1842 loss. Analysis of proliferation by cell counting revealed that loss of SNORD13 did not impact cell growth significantly (**Figure 2E**) and that cell death rates and

modalities were within normal range (**Figure 2F**). We next examined the levels of pre-rRNA precursors and mature rRNAs in SNORD13-KO cells by Northern blot (**supplementary Figure 2A-B**), RNase H mapping (**supplementary Figure 2C**) and pulse chase experiments (**supplementary Figure 2D**). These analyses revealed that loss of SNORD13 and/or SSU-ac<sup>4</sup>C1842 does not interfere with normal pre-rRNA processing. An involvement of SNORD13 and/or SSU-ac<sup>4</sup>C1842 on ribosomal subunit assembly and global translation was also investigated by performing polysomal analysis. In this assay, whole cytoplasmic extracts from SNORD13-KO and WT cells were subjected to sucrose density gradient fractionation (10-50%). As shown in **supplementary figure 2E**, the distribution and amplitude of peaks corresponding to 40S, 60S, 80S monosomes and polysomes were virtually identical in SNORD13-KO and WT cells. Moreover, detection of nascent protein production by puromycin labelling (SUnSET assay) revealed identical, translation-dependent incorporation patterns in SNORD13-KO and WT cells, again indicating that overall protein synthesis is unlikely to be severely impaired in SNORD13-deficient cells (**Figure 2G**). To test whether SSU-ac<sup>4</sup>C1782 plays a more subtle role in fine-tuning aspects of ribosome function such as translational fidelity, we transfected WT and SNORD13-KO cells with firefly luciferase reporter genes bearing in-frame stop codons (UAA, UAG) or point mutations (R218S) that abrogate enzymatic luciferase activity. These reporters enable any decrease in translational accuracy to be detected via a corresponding increase in firefly luciferase activity. Our data indicate that stop codon read-through and amino acid misincorporation in SNORD13-KO cells was similar between WT and KO cells (**Figure 2H-left panel**). Finally, when using a set of Renilla-IRES-Firefly bicistronic vectors, we also showed that the efficiency of internal ribosome entry site (IRES)-mediated translation was apparently unaffected in SNORD13-KO cells (**Figure 2H-right panel**). Overall, these findings suggest that SNORD13 and SSU-ac<sup>4</sup>C1842 are not essential for ribosome biogenesis or function; at least in standard laboratory growth conditions.

**SNORD13-deficient zebrafish embryos develop normally** - In order to understand the biological relevance of SNORD13 at the whole organism level, a 189 bp-long, CRISPR-Cas9 mediated deletion overlapping the *Danio rerio* (zebrafish) *snord13* gene locus on chromosome 8 was generated (**Figure 3A**). Crossing of individual heterozygotes led to the generation of homozygous adult *snord13* knockout fish of normal appearance (not shown). To exclude any maternal contribution, three different homozygous females were crossed with heterozygous males. As expected, *snord13* and ac<sup>4</sup>C in helix 45 were no longer detectable in RNA isolated from homozygous knockout fish, as judged by Northern blotting (**Figure 3B**) and ac<sup>4</sup>C sequencing (**Figure 3C**), respectively. Homozygous *snord13* individuals in the progeny did not present any apparent morphological defects at 30 hours post fertilization (30 hpf) and developed normally until adulthood (**Supplementary Figure 3A**). To explore the possible occurrence of more subtle defects, such as activation of the nucleolar stress pathway in response to impaired ribosome biogenesis (23), we performed immunostaining against activated Caspase-3. No increase in apoptotic cells was observed in the developing brain (**Figure 3D-E**) or spinal cord (**Figure 3F-G**) of *snord13*-deficient embryos, as compared to WT. Accordingly, the level of expression of the pro-apoptotic *bcl2*, *bax* and *puma* genes, as judged by RT-qPCR, was not significantly altered in *snord13* mutant embryos (**supplementary Figure 3B**). Finally, we performed immunostaining in WT and mutant embryos for the pan neural marker HuC/D which labels newly differentiated neurons in different structures including olfactory epithelium, pineal gland or optic tectum and the spinal cord. Again, no obvious difference could be detected between WT and mutant embryos (**Figure 3D-G**). Beside central nervous system development, we also sought to explore whether *snord13* mutant displayed defects in another process such as vasculogenesis. We found that the vasculature of the trunk which is composed of the dorsal aorta (DA), the cardinal vein (CV) and intersegmental vessels was also normal in 30 hpf *snord13*-deficient embryos, as revealed by *in situ* hybridization against the key vascular transcription factor *fli1a* (**Figures 3H-I**). Similarly, the expression levels of various markers of



the neural system (*lhx1a*, *pax6a* and *otx5*) and of the dorsal aorta trunk vasculature (*cdh5* and *fli1a*) were unchanged between WT and snord13-KO embryos, validating the lack of phenotypes observed (**Supplementary Figure 3B**). In conclusion, neither SNORD13 nor 18S rRNA ac<sup>4</sup>C in helix 45 appear to play any essential roles in embryonic zebrafish development.

**A cross-evolutionary survey of eukaryotic ribosomal RNA acetylation machinery** – To more fully apprehend the evolutionary origin of SNORD-mediated rRNA acetylation, we revisited the phylogenetic distribution of SNORD13 throughout eukaryotes, focusing primarily on Metazoan (animals) and Archaeplastida (organisms capable of photosynthesis). Using BLAST searches with low stringency algorithm parameters together with manual inspection, we identified many novel candidate SNORD13 homologs outside the vertebrate lineage, including Urochordata, Cephalochordata, Echinodermata, Arthropoda, Mollusca, Brachiopoda, Cnidaria and even Porifera (**Figure 4A/B**). As depicted in **Figure 4B**, many of the newly-identified SNORD13 genes are located within introns, both in the sense or antisense orientation with respect to transcription of their host-gene transcript. In Archaeplastida, SNORD13 was also uncovered in phylogenetically distant land plants, including in the freshwater green alga *C. braunii* (**Figure 4C**). A full list of newly-identified SNORD13 and proposed snoRNA:rRNA duplexes is provided in **Supplementary Data 1** and **Supplementary Figure 1**, respectively. These sequence analyses were accompanied by experimental profiling of ac<sup>4</sup>C at helix 45 in representative eukaryotic species. As listed in **Figure 4A**, acetylated cytidine was readily detected in the vast majority of organisms we examined, including unicellular eukaryotes such as slime molds (*P. polycephalum*), ciliates (*P. tetraurelia*, *P. falciparum*) or microalgae (*P. tricornutum*). We found, therefore, that SNORD13 is much more broadly distributed than initially thought and SNORD-mediated RNA acetylation is a widespread principle in eukaryotes. Consistent with this conclusion, NAT10 homologs were found in almost all organisms we queried, with the notable exception of *E. gracilis* (**Figure 4A, Supplementary data 2**).

**Atypical SNORD13-like homologs in Diptera** – SNORD13-like genes are present in many groups of Arthropoda (**Figure 5A, Supplementary data 1**), including *D. melanogaster* and *B. mori* where they had previously been identified as SNORDs of unknown functions (named Or-CD1 and Bm-10, respectively; (24,25)). In Diptera for which a genome annotation is available, Or-CD1 can be found either in large introns positioned in the 5'-UTR of two transcript isoforms generated from two alternative transcription sites (e.g. Swim, Tinagl1\_2), or within short introns embedded in the open reading frame of the host-gene (e.g. Zfp15, Rps11) (**Figure 5B**). To our surprise, the published sequence of Or-CD1, as well as that of all newly-identified SNORD13-like in Diptera, lack conserved antisense rRNA sequence at their 5'-end (**Figure 5C**). One potential explanation would be that the sequence upstream of the C-box is removed by exonucleolytic trimming of the spliced-out host-intron, very likely due to the absence of a 5'-capped structure which normally plays a protective role against degradation (26). Although plausible for small introns, such as those in Zfp15 or Rps11 genes, this hypothesis cannot account for all observations. For example, many Or-CD1-like in Arthropoda are located in introns (**Figure 4B**), yet they still retain a conserved rRNA complementarity in their 5'-end segment (**Figure 5C, Supplementary Figure 1**). As an alternative, we reasoned that being intronic may not necessarily rule out independent transcription from distinct promoter regions. This is supported by the fact that SNORD13 can be found positioned either in the sense or antisense orientation relative to transcription of their host-gene (**Figure 4B/5B**), a scenario that is not compatible with post-transcriptional processing from introns.

To probe the mode of expression of Or-CD1 in Arthropoda, total RNAs extracted from *D. melanogaster*, *L. humile* (ants) and *A. mellifera* (bees) were subjected to immunoprecipitation with R1131 antibodies that recognize the 2,2,7 trimethylguanosine (TMG) cap structure, enabling its use as a proxy for independent transcription. Consistent with the expected size for small RNAs lacking 5'-end extension in *D. melanogaster*, Northern blot analyses detected a

radioactive signal migrating at about 110 nucleotides (**Figure 5D, see also Figure 5F**). These RNA species were specifically immunoprecipitated with the R1131 antibodies indicating that, despite being located within an intron, Or-CD1 gene is independently transcribed. This conclusion is in line with prior studies showing that Or-CD1 represents one of the very few SNORD genes that recruit RNA polymerase II and the Little Elongation Complex (LEC;(27)). In agreement with phylogenetic comparison that identifies two conserved antisense rRNA elements (**Figure 5C**), Or-CD1 displays a 5'-capped extension in both *L. humile* and *A. mellifera* (**Figure 5D**), as evidenced by the sizes of RNAs recovered in the immunoprecipitation pellet fraction. This therefore identifies a second expression strategy by which independent transcription from introns can also yield “regular” extended forms of Or-CD1 (**Figure 5E**).

Thus, Or-CD1 in Diptera - but not in Arthropoda - displays only one antisense rRNA sequence (**Figure 5C**). In order to test if this remarkable fly SNORD13 was capable of guiding rRNA acetylation, a strain bearing a P-element inserted in the Or-CD1 gene was retrieved from the Bloomington Drosophila Stock Center (Dmel\PсноRNA:Or-CD1G9117). After demonstrating that Or-CD1 was no longer detected in the mutant adult flies (**Figure 5F**), we showed that acetylation in helix45 was abolished (**Figure 5G**). Thus, SSU-C1968 in *D. melanogaster* can be targeted for acetylation by a SNORD13 homolog displaying a single antisense element. Of note, Or-CD1 adult knockout flies are viable, fertile and do not manifest gross abnormalities (not shown), thus strengthening the notion that N4-acetylcytidine at helix 45 is largely dispensable for viability, at least under standard laboratory conditions. Based on our findings, we propose to rename Or-CD1 as SNORD13.

**Life without 18S rRNA acetylation: the cases of *C. elegans* and genetically modified  $\Delta snR4\Delta snR45$  mutant yeast.** A key role in ribosome biology of 18S rRNA helix 45, which in mature small ribosomal subunits lies directly adjacent to the decoding site, is implied by its

extreme sequence conservation in many phylogenetically-distant organisms belonging to all known eukaryotic supergroups. Furthermore, when mutations in helix 45 arise, they are often accompanied by compensatory base changes (**Supplementary Figure 4A**). The 5'-CCG-3' motif - wherein the second C is targeted for acetylation - was established as a key specificity sequence determinant for NAT10 (3,6). Remarkably, a few well-studied organisms lack this conserved motif or even the targeted substrate cytidine, including flagellated protozoan parasites (*T. vaginalis*, *T. brucei*, *L. major*), protozoan algae (*E. gracilis*), ciliate protozoa (*T. thermophila*), slime mold (*P. polycephalum*), corn smut fungus (*U. maydis*) or even the nematode (*C. elegans*) (**Figure 4A**). Other examples can be found in **Supplementary Figure 4B**. Only in the slime mold *P. polycephalum* did our ac<sup>4</sup>C sequencing reaction provide evidence for helix 45 acetylation within a non-consensus 5'-UCG-3' motif, suggesting that NAT10 may have a distinct biochemical specificity in this organism (**Supplementary Figure 5**). Of note, helix 34 of *P. polycephalum* is apparently not acetylated despite the presence of a similar 5'-UCG-3'. Given its importance as animal model and the prior determination that it carries an essential NAT10 gene (named *nath-10*)(28), we next focused on *C. elegans*. As shown in **Figure 6A-6B**, helix 45 of *C. elegans* 18S rRNA harbors a 5'-CUG-3' motif also found in other nematodes, notably those belonging to the Clades IV and V. By definition, this motif variant that lacks a middle cytidine cannot be acetylated canonically. Nonetheless, since NAT10 is present in the worm genome, we verified the absence of any other ac<sup>4</sup>C residue within helix 45 (**Figure 6C**, not shown). More surprisingly, we found that the 5'-CCG-3' motif in helix 34 was also devoid of acetylation (**Figure 6C**). The lack of rRNA acetylation in *C. elegans* elsewhere than in helices 34 and 45 was further examined using anti-ac<sup>4</sup>C immuno-northern blotting, in which signals for acetylated RNA were found to be limited to tRNAs (**Figure 6D**). It is important to note that ac<sup>4</sup>C-free ribosomes are not necessarily a universal feature of nematodes. Indeed, helix 45 was found to be acetylated in *S. carpocapsae*, an entomopathogenic nematode of the *Steinernematidae* family (**Supplementary Figure 5**). The evolutionary forces that drove

disappearance of rRNA acetylation in *C. elegans* remain unknown. Nonetheless, our results indicate that the changes in robustness of vulval cell-fate specification observed when the essential *nath10* gene was mutated (28,29) did not reflect loss of rRNA modification but more likely the involvement of *nath10* in pre-rRNA processing. A similar conclusion was reached recently when it was shown that the involvement of Fibrillarin in neural crest cell maturation depends on its role in pre-rRNA processing rather than in methylation ([doi.org/10.1101/2021.11.25.469989](https://doi.org/10.1101/2021.11.25.469989)). This is similar to prior observations in *S. cerevisiae* where Kre33 was shown to be essential but snR45 and/or SSU-ac<sup>4</sup>C1773 were not (16). As further validation of ac<sup>4</sup>C's dispensability in rRNA we interrogated a double mutant yeast strain in which snR4 and snR45 genes were simultaneously deleted, producing rRNA completely devoid of ac<sup>4</sup>C. As observed in **Figure 6E**, growth of double  $\Delta$ snR45 $\Delta$ snR4 mutants, as assayed in liquid or solid media, was undistinguishable from that of its wild-type counterpart whether at 30°C or higher sub-optimal temperatures. The lack of obvious phenotypes for  $\Delta$ snR4 $\Delta$ snR45 mutants at 30°C was also previously reported (29). Collectively, these data are in agreement with previous findings showing that  $\Delta$ Kre33 yeasts re-expressing a catalytic-dead form of Kre33 (H545A or R637A) grow normally, as compared to  $\Delta$ Kre33 yeasts re-expressing a WT form of Kre33 (16). Thus, we confirm that the absence of rRNA acetylation is unlikely to contribute to the essential function of Kre33. This latter lies very likely with its modification-independent requirement for pre-rRNA processing events leading to the production of mature 18S rRNA (5). This conclusion does not, however, rule out some roles for tRNA acetylation, particularly under suboptimal growth conditions. Indeed, *tan1* mutant strains show reduced growth rates at higher temperature (39°C), presumably due to decreased stability of unmodified serine tRNAs (30).

## Discussion

In order to interrogate the function of a single SNORD13-dependent cytidine acetylation in helix 45 of 18S rRNA, we have combined a cross-evolutionary survey of rRNA acetylation machinery across the eukaryotic tree of life and loss-of-function studies in four distinct models: budding yeasts, human cells, zebrafish and fly. This study represents one of the very few examples addressing the physiological roles of a SNORD in multicellular organisms bearing a germline-derived knockout (31-35). Although this peculiar rRNA ac<sup>4</sup>C is highly conserved, its loss surprisingly does not appear to grossly impact ribosome biogenesis or function, or even embryonic development. Consistent with this observation, we identify *C. elegans* as an evolutionary example of dispensable metazoan rRNA acetylation. Finally, the discovery of a 5' truncated form of SNORD13 in *D. melanogaster* suggests that the mechanism by which SNORDs assist NAT10 in catalyzing rRNA ac<sup>4</sup>C is likely more diverse than previously anticipated and in some case may rely on a single antisense element.

An important question raised by our study concerns the specific role of ac<sup>4</sup>C in 18S rRNA helix 45. In humans, the ribosomal protein eL41 (formerly RpL41) is positioned at the interface between the 40S and 60S subunits (36,37) and directly contacts ac<sup>4</sup>C1842 (38). This led to the proposal that acetylation may mediate functionally important crosstalk between the two subunits (38). However, our experimental settings failed to uncover any robust defects in ribosomal subunit assembly or protein synthesis in human SNORD13-KO cells. This is perhaps not surprising since eL41 knockout in yeast does not affect translation unless formation of another inter-subunit contact is compromised (39). A prominent role of ac<sup>4</sup>C in eL41 assembly and/or RNA::protein interaction is also quite unlikely since eL41 is correctly incorporated into ribosomes of *T. vaginalis* (40), *E. gracilis* (41), *L. donovani* (42) and *T. brucei* (42), all of which lack acetylation in helix 45 (**Supplementary Figure 6**). Even more tellingly, the relative

positioning of eL41 in ribosome and the 3-D architecture of helix 45 in the SSU of the archaea *T. kodakarensis* are not affected when TkNAT10 gene is deleted (6). Altogether, these observations point to a subtle molecular role for ac<sup>4</sup>C, possibly in fine tuning ribosome structure and/or function in sub-optimal environmental contexts and/or sensitized genetic backgrounds. Unravelling the precise physiological relevance of 18S rRNA acetylation in multicellular organisms, if any, represents a conceptually and technically formidable, but important, task for future studies.

Our bioinformatics search has considerably expanded the inventory of SNORD13 sequences in metazoans, identifying homologs well beyond vertebrates where they were previously thought to be restricted. However, we were unable to identify SNORD13 counterparts in many major phyla including Hemichordata, Annelida, Nematoda, Fungi (other than budding yeasts), algae or unicellular eukaryotes. Although the most parsimonious hypothesis would be that rapidly-evolving SNORD13 sequences make them difficult to detect, one cannot exclude the possibility that SNORD13 may have been lost in these lineages, which would imply that in these organisms rRNA acetylation may be catalyzed by NAT10 alone. More sophisticated structural and biochemical analyses will be critical to solve this question. An additional related question is whether acetylation of helix 34 is also strictly dependent on an antisense SNORD, as shown only in *S. cerevisiae* to date (16). The characterization of RNA-guided rRNA acetylation systems in Archaea, should they exist, represents an additional avenue that may lend invaluable evolutionary and mechanistic insights into this process (6,7).

Single nucleotide resolution cross-linking analysis has previously described how SNORDs guide the acetyltransferase to its rRNA substrate by use of two short base-pairing interactions on each side of the substrate cytosine, forming a “modification pocket” akin to H/ACA snoRNAs (SNORA) acting in pseudouridylation (16). During the course of this study, we unexpectedly

identified independently-transcribed SNORD13 gene in *D. melanogaster* that produces RNA species lacking 5'-sequence complementary to rRNA (**Figure 7**). The same may also hold true in other Diptera for which SNORD13 is embedded within a very short intron (e.g. *L. sericata*, *M. domestica*). In this case, it is indeed more than likely that exonucleolytic processing of the host-intron produces uncapped RNAs with the C- and D-boxes brought together by a short terminal 5'-3' terminal stem, as commonly found for other intron-located SNORD (26). The genomic constraints and selection pressure that led to changes in SNORD13 expression strategies across evolution are unknown, yet they have inherent mechanistic repercussions since the deposition of ac<sup>4</sup>C in helix 45 in *D. melanogaster* does not strictly require two antisense elements flanking the rRNA ac<sup>4</sup>C site. This finding contrasts with conclusions drawn from mutagenesis of yeast snR45 where the 5' antisense element appears essential for acetylation (16). It therefore implies an alternative mode of action of SNORD13 in *D. melanogaster* and, also more broadly, in Diptera. Finally, the overall structure of SNORD13 in Diptera is indistinguishable from that of the canonical intron-located SNORDs which mediate rRNA ribose methylation. It thus raises the intriguing question as to whether other intronic SNORDs in these organisms, particularly those of still elusive function, might also mediate acetylation on still unidentified RNA targets.

Altogether, our data point to interlaced questions regarding SNORD13 sequence diversity across evolution, the molecular mechanisms underlying site-specific rRNA acetylation and the physiological importance of ac<sup>4</sup>C in rRNA in cell homeostasis, development and physiology. In our view, tackling these complex issues through an evolutionary perspective will be undoubtedly fruitful and may produce more surprises since, paradoxically not to mention ironically, observations made here with two widely-studied models - *C. elegans* and *D. melanogaster* - depart considerably from those previously obtained from vertebrates and budding yeasts.



## Materials and Methods

Unless otherwise noted, all techniques for cloning and manipulating nucleic acids were performed according to standard protocols.

**Generation and characterization of SNORD13-deficient HAP1 cells** - HAP1 cells were grown at 37°C with 5% CO<sub>2</sub> in IMDM (Gibco; 4.5 g/L glucose) supplemented with 10% fetal bovine serum (PAN biotech), 1 mM Sodium Pyruvate (Gibco) and 1% penicillin-streptomycin (Sigma-Aldrich). The human SNORD13 gene was disrupted via CRISPR/Cas9-mediated deletion. Two sgRNAs selected using the CRISPR design tool at <https://zlab.bio/guide-design-resources> were cloned into pX459 V2.0 (Addgene #62988) plasmid. HAP1 cells seeded in six-well dishes (70-80% confluency) were co-transfected using lipofectamine 2000 (Thermo Fisher Scientific) with pX459\_sgRNA1 and pX459\_sgRNA2 (500 ng each). 48 hours post-transfection, cells were transiently treated with puromycin (2 µg/mL; ~ 36 hours) before being subjected to clonal selection by limiting dilution. Deletion events were validated by PCR (primer sequences are listed in **supplementary data S3**) and three clones per genotype were randomly chosen for further analyses. The rate of cell growth was assayed using Beckman Coulter Z1 particle counter. Cells were seeded into a 24-well plate and counted in quadruplicate at each time points. Six independent proliferation assays were performed. Apoptosis was detected using Annexin V-FITC/propidium iodide staining according to the manufacturer's instructions (BioLegend). Cells were analyzed using FacsVerse (Becton Dickinson) with acquisition of 20,000 total events (BD FacsSuite). Two independent experiments were performed.

**RNA extraction and rRNA analyses** - Total RNA was prepared using TRI reagent (MRC) according to the manufacturer's instructions and treated with RQ1 RNase-free DNase (Promega) and proteinase K (Sigma). For Northern blot analyses of low molecular-weight

species, total RNA (10  $\mu\text{g}$ ) was fractionated by electrophoresis on a 6% acrylamide, 7 M urea denaturing gel and electrotransferred onto a Hybond N membrane (Amersham GE Healthcare) as described previously (43). For Northern blot analyses of higher molecular-weight species, 4  $\mu\text{l}$  of total RNA (2.5 $\mu\text{g}/\mu\text{l}$ ) were added to 20  $\mu\text{l}$  of "glyoxal mix" (60% DMSO, BTPE 1.2X, 5% glycerol, 8% glyoxal solution (Sigma) and 40  $\mu\text{g}/\text{ml}$  Ethidium bromide), heat-denatured at 55°C for 60 min, chilled on ice for 10 min and separated by electrophoresis on a 1.2% agarose gel (Pipes 10 mM, Bis-tris 300 mM, EDTA 10 mM). Capillarity transfer was performed onto Hybond N+ membrane. In all cases, transfer was followed by UV light irradiation and membranes were pre-hybridized for 1 hour in 5x SSC, 0.1% SDS, 5x Denhardt's, 150 mg/ml yeast tRNA. Hybridization was carried out overnight at 50°C with 5'-[<sup>32</sup>P]-labeled-DNA oligonucleotide probes (100 000 cpm/ml). Membranes were washed twice with 0.1XSSC, 0.1% SDS at room temperature (2x10 min) before autoradiography. Pulse chase experiments were performed as described in (44). The day before, 12-well plates are seeded with 500,000 cells. Cells are then incubated in methionine-free DMEM (Invitrogen) for 30 min at 37°C, labeled for exactly 15 min with L-methyl <sup>3</sup>H methionine (50mCi/ml) and rinsed twice with IMDM containing unlabeled methionine. They were then incubated for 0 min (rinsed immediately twice with cold PBS), 30 min, 1h, 1h30, 2h, 2h30 in regular IMDM. After the corresponding chase time, cells were rinsed twice with cold PBS and lysed with Tri-Reagent (MRC). RNA samples were glyoxal denatured and separated on a 1.2% agarose gel and passively transferred to a nylon membrane as described above. The membrane was exposed 5 weeks to Biomax KODAK MS films with a KODAK BioMax Transcreen LE. RNase H mapping was performed as described in (44). A water solution containing 4  $\mu\text{g}$  of total RNA was heat-denatured (95°C for 3 min) in the presence of an antisense oligonucleotide matching the 3'-end of 18S rRNA (RNase H\_2, 100 $\mu\text{M}$ ). After allowing annealing by cooling down to room temperature, the RNA/oligonucleotide mixture was diluted to 30  $\mu\text{l}$  final with a reaction mix (1X RNase H reaction buffer, 65  $\mu\text{M}$  DTT, 0.5U/ $\mu\text{l}$  RNasin (Promega), 50 U RNase H (New England Biolabs) and

incubated at 37°C for 30 min. The reaction was stopped by adding 0.3 M sodium acetate pH 5.2/0.2 mM EDTA. RNA was phenol extracted, ethanol precipitated, loaded onto a 15% acrylamide gel and analyzed by Northern blot (<sup>32</sup>P-labeled 3'18S oligo-probe) as described above. For primer extension, two µg of total RNA extracted from adult flies were mixed with a 5'-<sup>32</sup>P-labeled oligo (~100000 cpm) and cDNA synthesis, generated according to the manufacturer's instructions, were resolved onto a 12 % denaturing acrylamide gel.

**Sucrose gradient sedimentation and Sunset assay** - Exponentially growing WT and SNORD13-Ko cells (~ 20 million per genotype) were treated with 100 µg/ml of cycloheximide (CHX, SIGMA) for 10 min at 37°C, rinsed twice with cold PBS/CHX (100µg/ml), collected by centrifugation (400 g, 5 min) and resuspended in 5 ml of cold Buffer A (10 mM Hepes, 1,5 mM MgCl<sub>2</sub>, 100mM KCl, CHX 100µg/ml, 1mM DTT). Cells were then centrifuged (400g, 10 min at 4°C), suspended in 700 µl of Buffer A and incubated 10 min on ice. Cells were then mechanically disrupted with a cold Dounce homogenizer (B) and centrifuged for 10 min (1000 g at 4°C). The cytoplasmic fraction (supernatant) was collected and centrifuged twice at 10 000 g (10 min, 4°C). About 1,5 mg of protein was loaded on a 10–50% sucrose gradient and centrifuged for 2h45min at 39 000 rpm in an Optima L-100XP Ultracentrifuge (Beckman-Coulter) using a SW41 rotor (Beckman). Gradients were then monitored at 260 nm and fractions were collected from the top using a Foxy Jr. fraction collector (Teledyne ISCO). Sunset assay was performed as described in (45). Exponentially growing cells were treated with 1 µg/ml of puromycin for 20 min. As a control, cycloheximide (100 µg/ml) was also added 15 min before puromycin treatment. Total cell extracts were then processed for western blot using an anti-puromycine antibody (Millipore, clone 12D10 #MABE343) as well as Anti-CDK9 (C12F7) mAb (cellsignal.com) as gel loading control.

**Immunoprecipitations** - Thirty microliters of rabbit R1131 anti-trimethylguanosine (3 mg/ml, a gift of Dr. R. Luhrmann) were incubated with gentle agitation for 120 min. at 4°C with 80µl of Proteine A Sepharose® 4B, Fast Flow from *S. aureus* (PAS, Sigma #P9424) in 1 ml of NET-150 buffer (50 mM Tris-HCl (pH 7.4), 150 mM NaCl, 0.05% Igepal® CA-630, SIGMA). Mouse IgG (Jackson Immunoresearch #315-005-008) was used as negative controls. PAS-Ig pellets were washed three times with 1 ml of NET-150 buffer. Thirty micrograms of total RNAs was then added to PAS-R1131 (or PAS-IgG) in 0.5 ml of NET-150 and incubated with gentle agitation for 60 min. at 4 °C. Pellets were then collected by centrifugation and washed seven times in 1 ml of NET-150. RNAs from pellet and supernatant were extracted by SDS/phenol extraction and analyzed by Northern blot as described below.

**Searching for SNORD13-like and 18S rRNA sequences in eukaryotic genomes** - Using vertebrate SNORD13 sequences as queries, iterative BLAST searches with low stringency algorithm parameters, together with manual inspection of some hits, were conducted using eukaryotic genome databases found at <https://blast.ncbi.nlm.nih.gov/Blast.cgi>, <https://rnacentral.org/>, <https://www.echinobase.org/entry/>, <http://mgbase.qnlm.ac/home>, <http://www.insect-genome.com/>, <https://bipaa.genouest.org/is/>, <https://i5k.nal.usda.gov/webapp/blast/>, <https://spaces.facsci.ualberta.ca/ephybase/>. Eukaryotic 18S rRNA sequences were retrieved either at <https://www.arb-silva.de/> or <https://www.ncbi.nlm.nih.gov/nucleotide/>.

**Mung bean nuclease protection assay and RP-HPLC** - Mung bean nuclease (MBN) protection assay was performed exactly as described before (46). 500 pmol of the synthetic deoxy oligonucleotide (5'-TAATGATCCTTCCGCAGGTTACCTACGGAAACCTTGTTACGAC TTTTAC-3') was incubated with 50 pmol of 18S rRNA and 5% of DMSO in 0.3 volume of hybridization buffer (250 mM of HEPES, 500 mM of KCl at pH 7). The mixture was incubated at 90°C for 5 minutes and then slowly cooled down to 45°C over 2 h. After hybridization, 35 units

of mung bean nuclease (New England Bio Labs (NEB)) and 0.02 mg/ml RNase A (Sigma-Aldrich) along with appropriate amount of 10x MBN buffer (NEB) were added to start digestion. The digestion was carried out at 35°C for 1 h. The protected fragment (RNA-DNA hybrid) was extracted from the reaction mixture by phenol/chloroform extraction, followed by overnight ethanol precipitation. The protected rRNA fragment was separated from the complementary DNA oligonucleotides on a denaturing 7 M Urea 15% PAGE gel. Bands were visualized by ethidium bromide staining and the rRNA band was excised and eluted using the D-Tube™ Dialyzers according to the manufacturer's protocol for electro elution (Novagen). Eluted rRNA fragment was digested to nucleosides using P1 nuclease and alkaline phosphatase as described before (46). Nucleosides were next analyzed by RP-HPLC on a Supelcosil LC-18-S HPLC column (25 cm x 4.6 mm, 5 µm) equipped with a pre-column (4.6 x 20 mm) at 30°C on an Agilent 1200 HPLC system, using a protocol described previously in (16).

**Targeted ac4C sequencing** - Nucleotide resolution sequencing of ac4C in 18S rRNA (helix 45 and helix 34) was performed as previously described (6). RNA samples were treated with sodium cyanoborohydride (100 mM in H<sub>2</sub>O) or vehicle (H<sub>2</sub>O) in a final reaction volume of 100 µL. Reactions were initiated by addition of 1 M HCl to a final concentration of 100 mM and incubated for 20 minutes at room temperature. Reactions were stopped by neutralizing the pH by the addition of 30 µL 1 M Tris-HCl pH 8.0. After incubation, reactions were adjusted to 200 µL with H<sub>2</sub>O, ethanol precipitated, desalted with 70% ice-cold ethanol, briefly dried on Speedvac, resuspended in H<sub>2</sub>O, and quantified by using a Nanodrop 2000 spectrophotometer. Cellular total RNA from individual reactions (200 pg) was incubated with specific h45/h34 rev primer (4.0 pmol) in a final volume of 20 µL. Individual reactions were heated to 65 °C for 5 min and transferred to ice for 3 min to facilitate annealing in SuperScript III reaction buffer (Invitrogen). After annealing, reverse transcriptions were performed by adding 5 mM DTT, 200 units SuperScript III RT, 500 µM dNTPs (use 250 µM dGTP) and incubating for 60 min at 55 °C.

Reaction was quenched by increasing the temperature to 70 °C for 15 min and store at 4 °C. cDNA (2 µL) was used as template in 50 µL PCR reaction with Phusion Hot start flex (New England Biolabs). Reaction conditions: 1X supplied HF buffer, 2.5 pmole each forward and reverse primer, 200 µM each dNTPs, 2 units Phusion hot start enzyme, 2 µL cDNA template. PCR products were run on a 2% agarose gel, stained with SYBR safe and visualized on UV transilluminator at 302 nm. Bands of the desired size were excised from the gel and DNA extracted using QIA-quick gel extraction kit from Qiagen and submitted for Sanger sequencing (GeneWiz) using the forward PCR primer. Processed sequencing traces were viewed using 4Peaks software. Peak height for each base was measured and the percent misincorporation was determined using the equation: “Percent misincorporation = (peak intensity of T)/(sum of C and T base peaks)\*100%”.

**Dual luciferase reporter assay** - 100,000 WT and SNORD13-KO cells were seeded into a 24-well plate for 24 hours. Cells were transfected using lipofectamine 2000 (Invitrogen) using 0.06 ng Renilla vector (internal control) and 500 ng of reporter Firefly vectors. 24 hours post-transfection, cells were harvested, lysed and luciferase activity was monitored using the Dual-Luciferase Reporter Assay kit (Promega) according to the manufacturer’s recommendations. Luciferase detection was assayed on Centro LB 960 Microplate Luminometer (Mikrowin 2000 Software). Five-Six independent transfections were performed with each measurement made in triplicate.

**Yeast cells and media conditions** - *S.cerevisiae* cells deleted of snR4 and snR45 or wild-type cells were grown at 30°C in standard YEP medium (1% yeast extract, 2% Bacto Peptone) supplemented with 2% dextrose (YPD). For Liquid growth assay, yeast cells were inoculated from a fresh YPD-agar plate into liquid YPD and grown for 48-72 hours at 30°C or 37°C. Optical density at 600 nm (OD<sub>600</sub>) of cells was then measured and used to dilute cells into a 96 well

plate (Cat # 167008, Thermo Scientific) at equal ODs of ~0.02OD (n=3 or 12 for 30°C and 37°C samples, respectively). Cells were then grown for 90 hours in an Epoch 2 microplate spectrophotometer (BID EPOCH2 Microplate Spectrometer from BioTek) at 30°C and 37°C and OD was measured every 30 minutes. Measured OD values were analyzed in R<sup>2</sup>. For presentation of growth curves, a regression line representing the mean of biological replicates was calculated using a generalized additive model. For Spot assay, yeast cells were inoculated from a fresh YPD-agar plate into liquid YPD and grown for 72 hours at 30°C and 37°C. Optical density at 600 nm (OD<sub>600</sub>) was subsequently measured and cells were serially diluted in 2% YPD, such that OD of cells varied from 0.02 OD to 0.00016 OD (5 fold dilutions). 3 µl of each diluted sample was used to spot cells on a YPD-agar plate, which was transferred to 30°C and 37°C. After 48 hours of incubation pictures were taken of the colonies. Each strain was grown in duplicates.

**Ethics statement and Zebrafish care** - Fish were handled in a facility certified by the French Ministry of Agriculture (approval number A3155510). The project has received an agreement number APAFIS#7124-20161 00517263944 v3. Anesthesia and euthanasia procedures were performed in Tricaine Methanesulfonate (MS222) solutions as recommended for zebrafish (0.16 mg/ml for anesthesia, 0.30 mg/ml for euthanasia). All efforts were made to minimize the number of animals used and their suffering, in accordance with the guidelines from the European directive on the protection of animals used for scientific purposes (2010/63/UE) and the guiding principles from the French Decret 2013–118. Embryos were raised and staged according to standard protocols and the Recommended Guidelines for Zebrafish Husbandry Conditions (47,48)

**Generation of Zebrafish snord13 mutants** - The two guide RNAs (gRNA) were designed using CHOPCHOP CRISPR Design *website* (<http://chopchop.cbu.uib.no>). The designed oligos

were annealed and ligated into the gRNA plasmid pX459 digested by *BbsI* (Thermo Scientific). The gRNAs were generated using the MEGAscript T7 transcription kit (Ambion) with PCR fragments containing T7 promoter. Transcripts were purified by phenol-chloroform extraction and Ethanol precipitation. 1 nl of a solution containing 10 $\mu$ M EnGen Cas9 NLS (NEB) and 100 ng/ $\mu$ l of gRNAs was injected at the one-cell stage. WT, heterozygous, and homozygous SNORD13 animals were then identified by PCR. Sequence primers can be found in **(supplementary data S3)**.

**RNA extraction, Reverse transcription and real-time PCR** - Total RNAs from 15 wild type and 15 mutant zebrafish embryos were extracted using TRI reagent (MRC) and treated with RQ1-RNase free DNase I (Promega) and Proteinase K (Sigma) as recommended by manufacturer's instructions. Total RNAs were converted into cDNA using GoScript RTase (Promega) random hexamer primers for 60 min at 42 °C according to manufacturer's instructions. cDNAs were then diluted 20-fold and quantified by qPCR using SYBER green (Bio-rad) and specific primers. Data were acquired on CFX96 Real-Time PCR detection System (Bio-rad). Samples were analysed in triplicates and the expression level was calculated relative to zebrafish housekeeping gene *EF1 $\alpha$* . Sequence primers can be found in **(supplementary data S3)**.

**Immunostaining and *in situ* hybridization** - Embryos were fixed overnight at 4°C in BT-FIX, after which they were immediately processed or dehydrated and stored at -20°C until use. After fixation or rehydration, embryos were washed twice with Phosphate Buffered Saline/1% Triton X-100 (PBST), permeabilized with PBST/0.5% Trypsin for 30 sec and washed twice again with PBST. After blocking with PBST/10% Fetal Calf Serum (FCS)/1% bovine serum albumin (BSA) (hereafter termed 'blocking solution') for at least 1 h, embryos were incubated with antibodies directed against either cleaved Caspase-3 (Asp175) (Cell Signaling Technology), or HuC/D



(Molecular Probes), in blocking solution overnight at 4 °C followed by 5 washing steps with PBST. Embryos were then incubated with the appropriate Alexa Fluor-conjugated secondary antibodies (Molecular Probes) for at least 2 h at room temperature and washed three times. Fluorescent in situ hybridization was carried out as previously described (49). *fli1a* riboprobe preparation has been described elsewhere (50). Embryos were dissected, flat-mounted in glycerol and images were recorded on the confocal microscope TCS SP8 (Leica Microsystems) with an L 25 × /0.95 W FLUOSTAR VIZIR objective (zoom X1.25) using the scanner resonant mode.

**Comparison of Ribosome 3D structures** - Atomic models of ribosomes from the following species: *H. sapiens*, PDB: 6EK0 (Natchiar et al, 2017); *P. falciparum*, pdb: 6OKK and 3J79 (51); *T. gondii*, PDB: 5XXU (40); *T. vaginalis*, PDB: 5XYI (40), *L. donovani*, PDB: 6AZ1, 6AZ3 (42); *E. gracilis*, PDB: 6ZJ3 (41) were displayed and aligned in UCSF Chimera (52) using the “Matchmaker” option, with the human 18S rRNA chain as reference. Prior to this structural alignment, cryo-EM maps of *P. falciparum* and *T. gondii* (EMD-2660 and EMD-6780, respectively) were visually inspected. Using UCSF Chimera and Coot (53), unattributed densities above C2065 in *P. falciparum* and C1764 in *T. gondii* cryo-EM map allowed to unambiguously replace unmodified residues by their ac<sup>4</sup>C counterparts in the corresponding atomic models.

**Data availability statement** - The data that support the findings of this study are available from the corresponding author [JC] upon reasonable request.

**Disclosure declaration** - The authors declare that they have no competing interests.

## **Acknowledgments**

We thank the many colleagues who kindly provided us with biological samples, particularly EMBRC-France (N. Turque, R. Lasbleiz), the Botanical garden of Toulouse, Insectosphere, Botanic-Blagnac, A. Mattout, S.Tournier, I. Massou, R. Jeanson, L. Distefano, P.Valenti, A. Dussutour, M. Betermier, J. Santos, K. Mochizuki, G. Allorent and P.M. Delaux. We are also grateful to Aurore Laire for excellent zebrafish care. This work was supported by Agence Nationale de la Recherche (ANR-18- CE12-0008-01). Research in the lab of JLM was supported by the Intramural Research Program of the NIH, National Cancer Institute, Center for Cancer Research (ZIA-BC011488). Research in the lab of D.L.J.L. is supported by the Belgian Fonds de la Recherche Scientifique (F.R.S./FNRS), the Université Libre de Bruxelles (ULB), the European Joint Programme on Rare Diseases (EJP-RD 'RiboEurope' and 'DBAGencure'), the Région Wallonne (SPW EER 'RIBOncancer'), the Internationale Brachet Stiftung, and the Epitran COST action (CA16120).

## References

1. Bruenger, E., Kowalak, J.A., Kuchino, Y., McCloskey, J.A., Mizushima, H., Stetter, K.O. and Crain, P.F. (1993) 5S rRNA modification in the hyperthermophilic archaea *Sulfolobus solfataricus* and *Pyrodicticum occultum*. *FASEB journal : official publication of the Federation of American Societies for Experimental Biology*, **7**, 196-200.
2. Thomas, G., Gordon, J. and Rogg, H. (1978) N4-Acetylcytidine. A previously unidentified labile component of the small subunit of eukaryotic ribosomes. *J Biol Chem*, **253**, 1101-1105.
3. Ito, S., Akamatsu, Y., Noma, A., Kimura, S., Miyauchi, K., Ikeuchi, Y. and Suzuki, T. (2014) A single acetylation of 18 S rRNA is essential for biogenesis of the small ribosomal subunit in *Saccharomyces cerevisiae*. *J Biol Chem*, **289**, 26201-26212.
4. Ito, S., Horikawa, S., Suzuki, T., Kawauchi, H. and Tanaka, Y. (2014) Human NAT10 is an ATP-dependent RNA acetyltransferase responsible for N4-acetylcytidine formation in 18 S ribosomal RNA (rRNA). *J Biol Chem*, **289**, 35724-35730.
5. Sharma, S., Langhendries, J.L., Watzinger, P., Kotter, P., Entian, K.D. and Lafontaine, D.L. (2015) Yeast Kre33 and human NAT10 are conserved 18S rRNA cytosine acetyltransferases that modify tRNAs assisted by the adaptor Tan1/THUMP1. *Nucleic acids research*, **43**, 2242-2258.
6. Sas-Chen, A., Thomas, J.M., Matzov, D., Taoka, M., Nance, K.D., Nir, R., Bryson, K.M., Shachar, R., Liman, G.L.S., Burkhart, B.W. *et al.* (2020) Dynamic RNA acetylation revealed by quantitative cross-evolutionary mapping. *Nature*, **583**, 638-643.
7. Coureux, P.D., Lazennec-Schurdevin, C., Bourcier, S., Mechulam, Y. and Schmitt, E. (2020) Cryo-EM study of an archaeal 30S initiation complex gives insights into evolution of translation initiation. *Commun Biol*, **3**, 58.
8. Johansson, M.J. and Bystrom, A.S. (2004) The *Saccharomyces cerevisiae* TAN1 gene is required for N4-acetylcytidine formation in tRNA. *RNA*, **10**, 712-719.
9. Arango, D., Sturgill, D., Alhusaini, N., Dillman, A.A., Sweet, T.J., Hanson, G., Hosogane, M., Sinclair, W.R., Nanan, K.K., Mandler, M.D. *et al.* (2018) Acetylation of Cytidine in mRNA Promotes Translation Efficiency. *Cell*, **175**, 1872-1886 e1824.
10. Tardu, M., Jones, J.D., Kennedy, R.T., Lin, Q. and Koutmou, K.S. (2019) Identification and Quantification of Modified Nucleosides in *Saccharomyces cerevisiae* mRNAs. *ACS Chem Biol*, **14**, 1403-1409.
11. Liu, H.Y., Liu, Y.Y., Yang, F., Zhang, L., Zhang, F.L., Hu, X., Shao, Z.M. and Li, D.Q. (2020) Acetylation of MORC2 by NAT10 regulates cell-cycle checkpoint control and resistance to DNA-damaging chemotherapy and radiotherapy in breast cancer. *Nucleic acids research*, **48**, 3638-3656.
12. Liu, X., Tan, Y., Zhang, C., Zhang, Y., Zhang, L., Ren, P., Deng, H., Luo, J., Ke, Y. and Du, X. (2016) NAT10 regulates p53 activation through acetylating p53 at K120 and ubiquitinating Mdm2. *EMBO reports*, **17**, 349-366.
13. Shen, Q., Zheng, X., McNutt, M.A., Guang, L., Sun, Y., Wang, J., Gong, Y., Hou, L. and Zhang, B. (2009) NAT10, a nucleolar protein, localizes to the midbody and regulates cytokinesis and acetylation of microtubules. *Experimental cell research*, **315**, 1653-1667.

14. Balmus, G., Larrieu, D., Barros, A.C., Collins, C., Abrudan, M., Demir, M., Geisler, N.J., Lelliott, C.J., White, J.K., Karp, N.A. *et al.* (2018) Targeting of NAT10 enhances healthspan in a mouse model of human accelerated aging syndrome. *Nature communications*, **9**, 1700.
15. Larrieu, D., Britton, S., Demir, M., Rodriguez, R. and Jackson, S.P. (2014) Chemical inhibition of NAT10 corrects defects of laminopathic cells. *Science*, **344**, 527-532.
16. Sharma, S., Yang, J., van Nues, R., Watzinger, P., Kotter, P., Lafontaine, D.L.J., Granneman, S. and Entian, K.D. (2017) Specialized box C/D snoRNPs act as antisense guides to target RNA base acetylation. *PLoS genetics*, **13**, e1006804.
17. Watkins, N.J. and Bohnsack, M.T. (2012) The box C/D and H/ACA snoRNPs: key players in the modification, processing and the dynamic folding of ribosomal RNA. *Wiley interdisciplinary reviews. RNA*, **3**, 397-414.
18. Bachellerie, J.P., Michot, B., Nicoloso, M., Balakin, A., Ni, J. and Fournier, M.J. (1995) Antisense snoRNAs: a family of nucleolar RNAs with long complementarities to rRNA. *Trends in biochemical sciences*, **20**, 261-264.
19. Kim, S.H., Spensley, M., Choi, S.K., Calixto, C.P., Pendle, A.F., Koroleva, O., Shaw, P.J. and Brown, J.W. (2010) Plant U13 orthologues and orphan snoRNAs identified by RNomics of RNA from Arabidopsis nucleoli. *Nucleic acids research*, **38**, 3054-3067.
20. Tyc, K. and Steitz, J.A. (1989) U3, U8 and U13 comprise a new class of mammalian snRNPs localized in the cell nucleolus. *EMBO J*, **8**, 3113-3119.
21. Essletzbichler, P., Konopka, T., Santoro, F., Chen, D., Gapp, B.V., Kralovics, R., Brummelkamp, T.R., Nijman, S.M. and Burckstummer, T. (2014) Megabase-scale deletion using CRISPR/Cas9 to generate a fully haploid human cell line. *Genome Res*, **24**, 2059-2065.
22. Thomas, J.M., Briney, C.A., Nance, K.D., Lopez, J.E., Thorpe, A.L., Fox, S.D., Bortolin-Cavaille, M.L., Sas-Chen, A., Arango, D., Oberdoerffer, S. *et al.* (2018) A Chemical Signature for Cytidine Acetylation in RNA. *J Am Chem Soc*, **140**, 12667-12670.
23. Langhendries, J.L., Nicolas, E., Doumont, G., Goldman, S. and Lafontaine, D.L. (2016) The human box C/D snoRNAs U3 and U8 are required for pre-rRNA processing and tumorigenesis. *Oncotarget*, **7**, 59519-59534.
24. Huang, Z.P., Zhou, H., He, H.L., Chen, C.L., Liang, D. and Qu, L.H. (2005) Genome-wide analyses of two families of snoRNA genes from *Drosophila melanogaster*, demonstrating the extensive utilization of introns for coding of snoRNAs. *RNA*, **11**, 1303-1316.
25. Li, D., Wang, Y., Zhang, K., Jiao, Z., Zhu, X., Skogerboe, G., Guo, X., Chinnusamy, V., Bi, L., Huang, Y. *et al.* (2011) Experimental RNomics and genomic comparative analysis reveal a large group of species-specific small non-message RNAs in the silkworm *Bombyx mori*. *Nucleic acids research*, **39**, 3792-3805.
26. Kiss, T. and Filipowicz, W. (1995) Exonucleolytic processing of small nucleolar RNAs from pre-mRNA introns. *Genes & development*, **9**, 1411-1424.
27. Smith, E.R., Lin, C., Garrett, A.S., Thornton, J., Mohaghegh, N., Hu, D., Jackson, J., Saraf, A., Swanson, S.K., Seidel, C. *et al.* (2011) The little elongation complex regulates small nuclear RNA transcription. *Molecular cell*, **44**, 954-965.
28. Dubeau, F. and Felix, M.A. (2012) Role of pleiotropy in the evolution of a cryptic developmental variation in *Caenorhabditis elegans*. *PLoS biology*, **10**, e1001230.

29. Dudnakova, T., Dunn-Davies, H., Peters, R. and Tollervey, D. (2018) Mapping targets for small nucleolar RNAs in yeast. *Wellcome open research*, **3**, 120.
30. Dewe, J.M., Whipple, J.M., Chernyakov, I., Jaramillo, L.N. and Phizicky, E.M. (2012) The yeast rapid tRNA decay pathway competes with elongation factor 1A for substrate tRNAs and acts on tRNAs lacking one or more of several modifications. *RNA*, **18**, 1886-1896.
31. Ding, F., Li, H.H., Zhang, S., Solomon, N.M., Camper, S.A., Cohen, P. and Francke, U. (2008) SnoRNA Snord116 (Pwcr1/MBII-85) deletion causes growth deficiency and hyperphagia in mice. *PloS one*, **3**, e1709.
32. Hebras, J., Marty, V., Personnaz, J., Mercier, P., Krogh, N., Nielsen, H., Aguirrebengoa, M., Seitz, H., Pradere, J.P., Guiard, B.P. *et al.* (2020) Reassessment of the involvement of Snord115 in the serotonin 2c receptor pathway in a genetically relevant mouse model. *eLife*, **9**.
33. Lee, J., Harris, A.N., Holley, C.L., Mahadevan, J., Pyles, K.D., Lavagnino, Z., Scherrer, D.E., Fujiwara, H., Sidhu, R., Zhang, J. *et al.* (2016) Rpl13a small nucleolar RNAs regulate systemic glucose metabolism. *The Journal of clinical investigation*, **126**, 4616-4625.
34. Skryabin, B.V., Gubar, L.V., Seeger, B., Pfeiffer, J., Handel, S., Robeck, T., Karpova, E., Rozhdestvensky, T.S. and Brosius, J. (2007) Deletion of the MBII-85 snoRNA gene cluster in mice results in postnatal growth retardation. *PLoS genetics*, **3**, e235.
35. Soeno, Y., Fujita, K., Kudo, T., Asagiri, M., Kakuta, S., Taya, Y., Shimazu, Y., Sato, K., Tanaka-Fujita, R., Kubo, S. *et al.* (2013) Generation of a mouse model with down-regulated U50 snoRNA (SNORD50) expression and its organ-specific phenotypic modulation. *PloS one*, **8**, e72105.
36. Ben-Shem, A., Garreau de Loubresse, N., Melnikov, S., Jenner, L., Yusupova, G. and Yusupov, M. (2011) The structure of the eukaryotic ribosome at 3.0 Å resolution. *Science*, **334**, 1524-1529.
37. Natchiar, S.K., Myasnikov, A.G., Kratzat, H., Hazemann, I. and Klaholz, B.P. (2017) Visualization of chemical modifications in the human 80S ribosome structure. *Nature*, **551**, 472-477.
38. Sharma, S. and Lafontaine, D.L.J. (2015) 'View From A Bridge': A New Perspective on Eukaryotic rRNA Base Modification. *Trends in biochemical sciences*, **40**, 560-575.
39. Tamm, T., Kisly, I. and Remme, J. (2019) Functional Interactions of Ribosomal Intersubunit Bridges in *Saccharomyces cerevisiae*. *Genetics*, **213**, 1329-1339.
40. Li, Z., Guo, Q., Zheng, L., Ji, Y., Xie, Y.T., Lai, D.H., Lun, Z.R., Suo, X. and Gao, N. (2017) Cryo-EM structures of the 80S ribosomes from human parasites *Trichomonas vaginalis* and *Toxoplasma gondii*. *Cell research*, **27**, 1275-1288.
41. Matzov, D., Taoka, M., Nobe, Y., Yamauchi, Y., Halfon, Y., Asis, N., Zimmermann, E., Rozenberg, H., Bashan, A., Bhushan, S. *et al.* (2020) Cryo-EM structure of the highly atypical cytoplasmic ribosome of *Euglena gracilis*. *Nucleic acids research*, **48**, 11750-11761.
42. Shalev-Benami, M., Zhang, Y., Rozenberg, H., Nobe, Y., Taoka, M., Matzov, D., Zimmerman, E., Bashan, A., Isobe, T., Jaffe, C.L. *et al.* (2017) Atomic resolution snapshot of *Leishmania* ribosome inhibition by the aminoglycoside paromomycin. *Nature communications*, **8**, 1589.

43. Cavaille, J. and Bachellerie, J.P. (1998) SnoRNA-guided ribose methylation of rRNA: structural features of the guide RNA duplex influencing the extent of the reaction. *Nucleic acids research*, **26**, 1576-1587.
44. Montellese, C., Montel-Lehry, N., Henras, A.K., Kutay, U., Gleizes, P.E. and O'Donohue, M.F. (2017) Poly(A)-specific ribonuclease is a nuclear ribosome biogenesis factor involved in human 18S rRNA maturation. *Nucleic acids research*, **45**, 6822-6836.
45. Martineau, Y., Azar, R., Muller, D., Lasfargues, C., El Khawand, S., Anesia, R., Pelletier, J., Bousquet, C. and Pyronnet, S. (2014) Pancreatic tumours escape from translational control through 4E-BP1 loss. *Oncogene*, **33**, 1367-1374.
46. Yang, J., Sharma, S., Watzinger, P., Hartmann, J.D., Kotter, P. and Entian, K.D. (2016) Mapping of Complete Set of Ribose and Base Modifications of Yeast rRNA by RP-HPLC and Mung Bean Nuclease Assay. *PLoS one*, **11**, e0168873.
47. Alestrom, P., D'Angelo, L., Midtlyng, P.J., Schorderet, D.F., Schulte-Merker, S., Sohm, F. and Warner, S. (2020) Zebrafish: Housing and husbandry recommendations. *Laboratory animals*, **54**, 213-224.
48. Kimmel, C.B., Ballard, W.W., Kimmel, S.R., Ullmann, B. and Schilling, T.F. (1995) Stages of embryonic development of the zebrafish. *Developmental dynamics : an official publication of the American Association of Anatomists*, **203**, 253-310.
49. Quillien, A., Moore, J.C., Shin, M., Siekmann, A.F., Smith, T., Pan, L., Moens, C.B., Parsons, M.J. and Lawson, N.D. (2014) Distinct Notch signaling outputs pattern the developing arterial system. *Development*, **141**, 1544-1552.
50. Lawson, N.D., Scheer, N., Pham, V.N., Kim, C.H., Chitnis, A.B., Campos-Ortega, J.A. and Weinstein, B.M. (2001) Notch signaling is required for arterial-venous differentiation during embryonic vascular development. *Development*, **128**, 3675-3683.
51. Wong, W., Bai, X.C., Brown, A., Fernandez, I.S., Hanssen, E., Condrón, M., Tan, Y.H., Baum, J. and Scheres, S.H. (2014) Cryo-EM structure of the Plasmodium falciparum 80S ribosome bound to the anti-protozoan drug emetine. *eLife*, **3**.
52. Pettersen, E.F., Goddard, T.D., Huang, C.C., Couch, G.S., Greenblatt, D.M., Meng, E.C. and Ferrin, T.E. (2004) UCSF Chimera--a visualization system for exploratory research and analysis. *Journal of computational chemistry*, **25**, 1605-1612.
53. Emsley, P., Lohkamp, B., Scott, W.G. and Cowtan, K. (2010) Features and development of Coot. *Acta crystallographica. Section D, Biological crystallography*, **66**, 486-501.

## Figure - Legends

**Figure 1 - Schematic of SNORD13-dependent ribosomal RNA acetylation. A)** Through an incompletely defined antisense-mediated mechanism, human SNORD13 assists the RNA cytidine acetyltransferase NAT10 in modifying C1842 in the universally conserved helix 45 at the 3' extremity of 18S rRNA. **B)** Helix 45 is enriched with post-transcriptional RNA modifications. RNA modifying enzymes and their modified nucleotides (lollipops) are indicated: SSU-ac<sup>4</sup>C1842 (yellow), SSU-m<sup>6</sup>A1832 (green) and SSU-m<sub>2</sub><sup>6</sup>A1850 and SSU-m<sub>2</sub><sup>6</sup>A1851 (orange). **C)** Human SNORD13 base-pairs with 18S rRNA sequences on each side of the cytidine to be acetylated. Note that SNORD13-rRNA duplexes tolerate G-U wobble base-pairs, mismatches or even bulged nucleotides and the length of the intervening loops, from either rRNA or SNORD side, also differ from one organism to another (**Supplementary figure S1**).

**Figure 2 - The specific lack of SNORD13-mediated acetylation in helix 45 does not alter cell growth or translation. A)** Schematic representation of SNORD13 locus at human chromosome 8. The relative location of the two DNA sequences targeted by sgRNAs is shown (PAM sequence is underlined). **B)** Northern blot showing that SNORD13 is no longer detected in clones bearing deletions. \* indicate truncated SNORD13 form which is routinely detected and corresponding to RNA species whose 5'-end is positioned 5-6 nucleotides upstream of the C-box (not shown). **C)** RP-HPLC chromatograms of nucleosides obtained from helix 45 of WT (black) and SNORD13 (red) cells. Peak corresponding to SSU-ac<sup>4</sup>c1842 is indicated. **D)** Sanger DNA sequencing of RT-PCR products obtained after borohydride treatments of total RNA extracted from WT and SNORD13-KO cells. % of misincorporation (C-to-U) at SSU-C1842 (helix 45) and SSU-C1337 (helix 34) is indicated below each electropherogram. **E)** Growth curves of WT and SNORD13-KO cells as judged by cell counting (n=6 for each genotype). **F)** Apoptosis levels determined by flow cytometry using propidium and Annexin V

staining of WT and SNORD13-KO cells (n=2 for each genotype). **G**) SUnSET assay. Incorporation of puromycin into the elongating peptide was assayed in WT and SNORD13-KO cells (western blotting with anti-puromycin antibodies). Ponceau S staining of the membrane and detection of CDK9 (western blotting) were used as gel loading controls. Cells treated with the translation inhibitor cycloheximide (CHX) were also used as negative controls. **H**) Luciferase reporter gene assays. WT and SNORD13-KO cells were transiently co-transfected by two plasmids expressing Renilla luciferase gene (LucR; internal control) or Firefly luciferase gene (lucF; translation reporter) carrying either an in-frame stop-codons (UAA, UAG), a detrimental mutation (R-to-S) or an IRES from FGF1A, FGF2 and CMV. Histograms show the normalized luciferase activity (lucF-to-lucR ratio). Data are expressed as mean +/- s.e.m. and represent 5-6 independent experiments with triplicate measurements.

**Figure 3 - Phenotypic analyses of SNORD13-deficient zebrafish embryos.** **A)** Schematic representation of the zebrafish *snord13* locus. The relative location of the two DNA sequences targeted by sgRNAs is shown (PAM sequence is underlined). **B)** Northern blotting showing that SNORD13 is no longer detected in embryos bearing deletion events. \*: truncated SNORD13 form which is routinely detected. SNORD118 was used as a gel loading control. **C)** Histograms show percentage of misincorporation (C-to-U ratio) measured in borohydride-treated RNA samples prepared from WT and SNORD13-KO embryos (n= 3). **D-G** Confocal projections of WT (**D, F**) and SNORD13-KO (**E, G**) embryos after immunostaining against cleaved Caspase-3 (red) and the pan neural marker HuC/D (green). **D-E:** Dorsal view of the zebrafish brain at 30 hpf, neurons from the olfactory epithelium (oe), tectum (t), pineal gland (pg), optic tectum (ot) and trigeminal ganglion (tg) can be detected. **F-G:** Lateral view of the spinal cord (sc) at 30 hpf. **H-I** Confocal projections of WT (**H**) and SNORD13-KO (**I**) embryos after *in situ* RNA hybridization using antisense riboprobes directed against *fli1a* transcripts. White brackets indicate the dorsal aorta (DA) and the cardinal vein (CV) and the white arrows point to



intersegmental vessels. Pictures are representative of three independent experiments (at least 6 embryos imaged per genotype).

**Figure 4 - Cross-evolutionary survey of eukaryotic rRNA acetylation machinery.** **A)** This table summarizes the conservation of the 5'-CCG-3' motif, the acetylation status of helix 45 and the detection of SNORD13 and NAT10 genes in commonly used models or organisms for which we experimentally assayed the presence of ac<sup>4</sup>C at helix 45. n.d.: not determined. n/a: not applicable (genome is not available). **B)** Simplified phylogenetic tree of Metazoan. The genomic organization (intronic vs intergenic) of newly-identified SNORD13 genes (red arrows) is shown. Note that intronic SNORD13 can be positioned in the sense or antisense orientation with respect to their host-genes (black arrow). **C)** Simplified phylogenetic tree of Archaeplastida. Acetylation status of helix 45 and the presence of SNORD13 in the genome of representative species are indicated. Note that while rRNA in algal species is acetylated, we failed to identify obvious SNORD13 counterparts. A full list of newly-identified SNORD13 sequences can be found in **Supplementary data S1**.

**Figure 5 - Atypical SNORD13-related RNA guides rRNA acetylation in *D. melanogaster*.** **A)** Simplified phylogenetic tree of Arthropoda. Representative species where SNORD13-like were identified are indicated. **B)** Simplified phylogenetic tree of Diptera. The genomic arrangements of newly-identified SNORD13 genes (blue arrow) are shown. **C)** Multiple sequence alignment of representative eukaryotic SNORD13 sequences. The small red arrow indicates the relative position of the mature 5'-end of Or-CD1 in Diptera (see also panel F) while the two horizontal black arrows in opposite orientation depict the terminal 5'-3' stem structure. Note that SNORD13 sequences in Diptera - but not in other species - lack one of the two conserved antisense rRNA elements (denoted by horizontal blue bars). Vertical black, grey and white bars highlight Diptera, other Arthropoda and non-Arthropoda species, respectively. **D)** Immunoprecipitation by anti-

trimethyl cap (R1131) antibodies. OR-CD1 in various insects (as indicated above the panels) was detected by Northern blots. The same membrane was hybridized with an antisense oligo probes that recognized uncapped 5.8S rRNA used as negative controls. Input RNA (I); RNA recovered from the pellet (P), RNA recovered from the supernatant (S). The theoretical size of SNORD13 (nt) in each of the species studied is indicated in parentheses. **E)** Schematic representation of two distinct modes of expression: independent transcription gives rise to short (top) or long (bottom) forms of 5' capped SNORD13. **F)** A mutant KO fly strain harboring an inserted P-element in the Or-CD1 gene (*Dmel*\{EP}snoRNA:Or-CD1G9117) does not express OR-CD1 as assayed by primer extension. Note that the 5'-end of the cDNA product confirms that fly Or-CD1 lacks one 18S rRNA complementarity. The expected size (nt) of OR-CD1 with ~4-5 nucleotides upstream of the C-box (as shown on the panel) is indicated in parentheses. <sup>32</sup>P labeled primer (P). **G)** Misincorporation (C-to-U) at SSU-C1968 (helix 45) as judged by Sanger DNA sequencing of RT-PCR products obtained after borohydride treatments of total RNA extracted from WT and Or-CD1-KO adult flies.

**Figure 6 – Life without rRNA acetylation** **A)** Simplified phylogenetic tree of Nematoda. Sequence contexts of the acetylated cytidine in representative species of each clade are indicated. **B)** Schematic representations of helix 45. Green bases represent compensatory base changes, as compared to human helix 45, while red bases provoke irregularity in the geometry of helix 45. The triplet sequence motif is framed. **C)** Sanger DNA sequencing of RT-PCR products obtained after borohydride treatments of total RNA extracted from *C. elegans*. **D)** Ac<sup>4</sup>C content in total RNA extracted from adult *C. elegans* was visualized by Northern blotting-based assay using anti-Ac<sup>4</sup>C antibodies. Ethidium bromide (etBr) staining indicates the relative position of rRNA and tRNA species. **E)** Top-panels: WT and  $\Delta$ snR4 $\Delta$ snR45 yeast strains were grown at 30°C (left) or 37°C (right) in liquid YPD. Optical density at 600 nm (OD<sub>600</sub>) was measured every 30 minutes. Growth curves of individual biological samples (thin lines; n=3 or

12 for 30 °C and 37 °C samples, respectively) and the mean of replicates (thick lines) are presented along with a confidence interval (gray area). Bottom-panels: WT and  $\Delta$ snR4 $\Delta$ snR45 yeast strains were spotted on a YPD-agar plate and incubated for 48 hours at 30°C or 37°C. Cells were grown in duplicates with a 5-fold dilution between distinct concentrations.

**Figure 7 – Comparative schematic representation of rRNA modification systems. A)**

Through the formation of a perfect (or near perfect) RNA duplex (~10-20 bp), SNORDs guide Fibrillarin/Nop1 to their target rRNA nucleotides, i.e. the nucleotide to be 2'-O-methylated (2'-O-Me) is paired to the fifth position upstream of the conserved D (or D') box. **B)** Through the formation of two perfect (or near perfect) RNA duplexes (~4-10 bp each), SNORAs guide Dyskerin/Cbf5 to their target rRNA nucleotides, i.e. the uridine to be isomerized into pseudouridine ( $\psi$ ) remains unpaired and it is located at ~ 14-16 nt from the conserved H (or ACA) box. **C)** snR45, snR4 and SNORD13 contain two imperfect antisense elements matching either side of the cytidine to be acetylated ( $ac^4C$ ) and, through still unknown mechanisms, guide cytosine acetylation by NAT10/Kre33. **D)** In *D. melanogaster*, SNORD13 targets rRNA acetylation at helix 45 through the use of a single antisense rRNA sequence.

**Supplementary figure S1 - Examples of SNORD13-rRNA duplexes across evolution.**

Schematic representations of base-pairing interactions between SNORD13 and 18S rRNA (only a few representative examples are shown). The targeted C for acetylation is written in green.

**Supplementary figure S2 - Loss of SNORD13 does not affect pre-rRNA synthesis and processing. A-B)**

Northern blot - Total RNA prepared from WT and SNORD13-KO clones, as well as from a pool of the three WT and KO clones, were analysed by Northern blot using probe 1 (5-ITS1) and probe 2 (ITS2) that detect main rRNA precursors intermediates as depicted in panel B). Cytoplasmic 18S and 28S rRNAs were also visualized by ethidium bromide staining of

a denaturing 1.2% agarose gel. Relative quantification of rRNA intermediates based on three independent Northern blots did not reveal any obvious abnormalities (not shown). **C)** RNase H assay - Total RNA extracted from WT or SNORD13-KO cells were annealed with antisense DNA oligonucleotide (black line), RNase H digestion products were then resolved onto a 12% acrylamide gels and visualized by Northern blot with an antisense oligo-probe matching the 3'-end of 18S (red line). The ladder-like pattern reflecting heterogeneity of the 3'-end at 18S in SNORD13-KO cells was indistinguishable from that of observed in WT cells, indicating that the accuracy of cleavages that delineates the 3' extremity of 18S rRNA is not impaired in SNORD13-KO cells. **D)** Pulse chase experiments - WT and SNORD13-KO cells were pulse-labelled with L-[methyl-<sup>3</sup>H]-methionine and harvested by chase times as indicated above the panel. Freshly-synthesized rRNA intermediates were detected by autoradiography after being separated by electrophoresis on denaturing 1.2% gel and transferred to a nylon membrane. Dynamics of rRNA synthesis in the SNORD13-KO cells was in the normal range, as shown by the timing of appearance and lifespan of the detected methyl-<sup>3</sup>H labelled rRNA precursors. **E)** Polysome profiling - Whole cytoplasmic extracts prepared from WT and (left) SNORD13-KO (right) cells were fractionated by ultracentrifugation on a 10-50% sucrose gradient. Absorbance (254 nm) of each fraction was recorded and the peaks corresponding to free 40S and 60S subunits, 80S ribosomes (monosomes) and polysomes are indicated.

**Supplementary figure S3 - Deletion of *snord13* gene does not perturb zebrafish development.** **A)** Bright field images of WT (up) and homozygous (down) *snord13* mutant embryos derived from the crossing of homozygous *snord13* females with heterozygous males. Pictures are representative of three independent crosses. **B)** Relative mRNA expressions determined by RT-qPCR in 30 hpf WT and SNORD13-KO embryos (3 independent experiments with at least 15 animals per condition). The tested genes are listed below the histogram (black and red histograms correspond to WT and KO, respectively).

**Supplementary figure S4 – Phylogenetic conservation of helix 45 across evolution.**

Sequence **(A)** and schematic representations **(B)** of helix 45 in representative species belonging to each eukaryotic supergroup. Green bases represent compensatory base changes, as compared to human helix 45, while red bases alter the geometry of helix 45. The triplet sequence motif is framed.

**Supplementary figure S5 – Probing rRNA acetylation in *T. thermophila*, *S. carpocapsae***

**and *P. polycephalum*.** Sanger DNA sequencing of RT-PCR products obtained after borohydride treatments of total RNA extracted from *P. polycephalum* (left) *T. thermophila* (middle), *S. carpocapsae* (right). % of misincorporation at helix 45 is indicated below each electropherogram.

**Supplementary figure S6 – rRNA h45 acetylation does not seem to affect Rpl41**

**positioning.** Spatial alignment of Ribosomal 3D structures of various species, carrying either acetylated C (left panel) or unmodified U or G (right panel) on rRNA helix 45 (h45) revealed no change in the location of ribosomal protein Rpl41 (eL41). For each aligned species (indicated on the top left of each vignette), the modified/unmodified nucleotide of interest is shown both on the structure as well as on the 3-nucleotide sequence by an underlined character. For spatial cueing, lateral chain of an N-terminal Arginine of Rpl41, one of the closest aminoacids of the nucleotide of interest, is fully displayed.

**Supplementary data S1 – Examples of newly-identified SNORD13 sequences.**

**Supplementary data S2 – The primary structure of NAT10 across evolution**

**Supplementary data S3 – Sequences of primers**



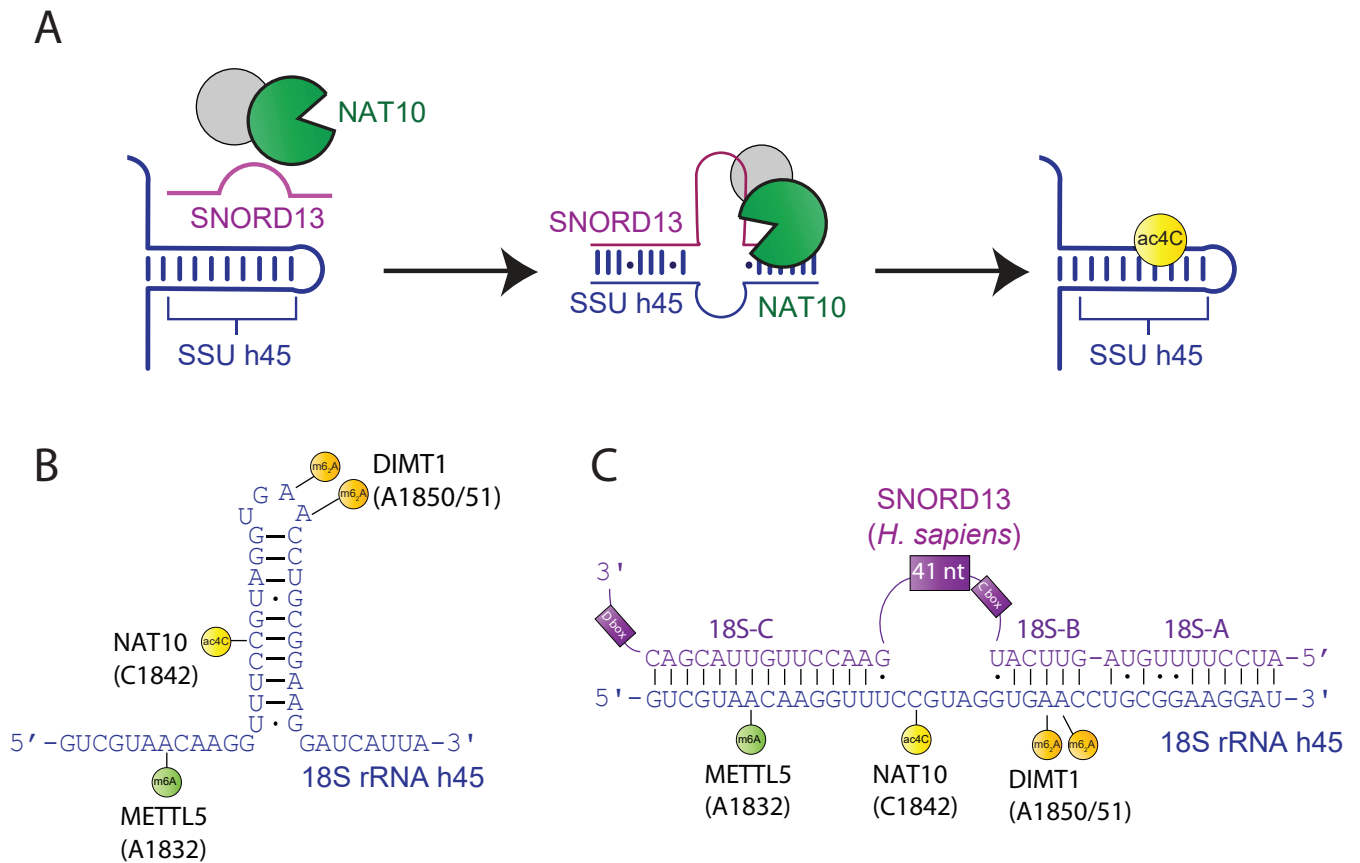

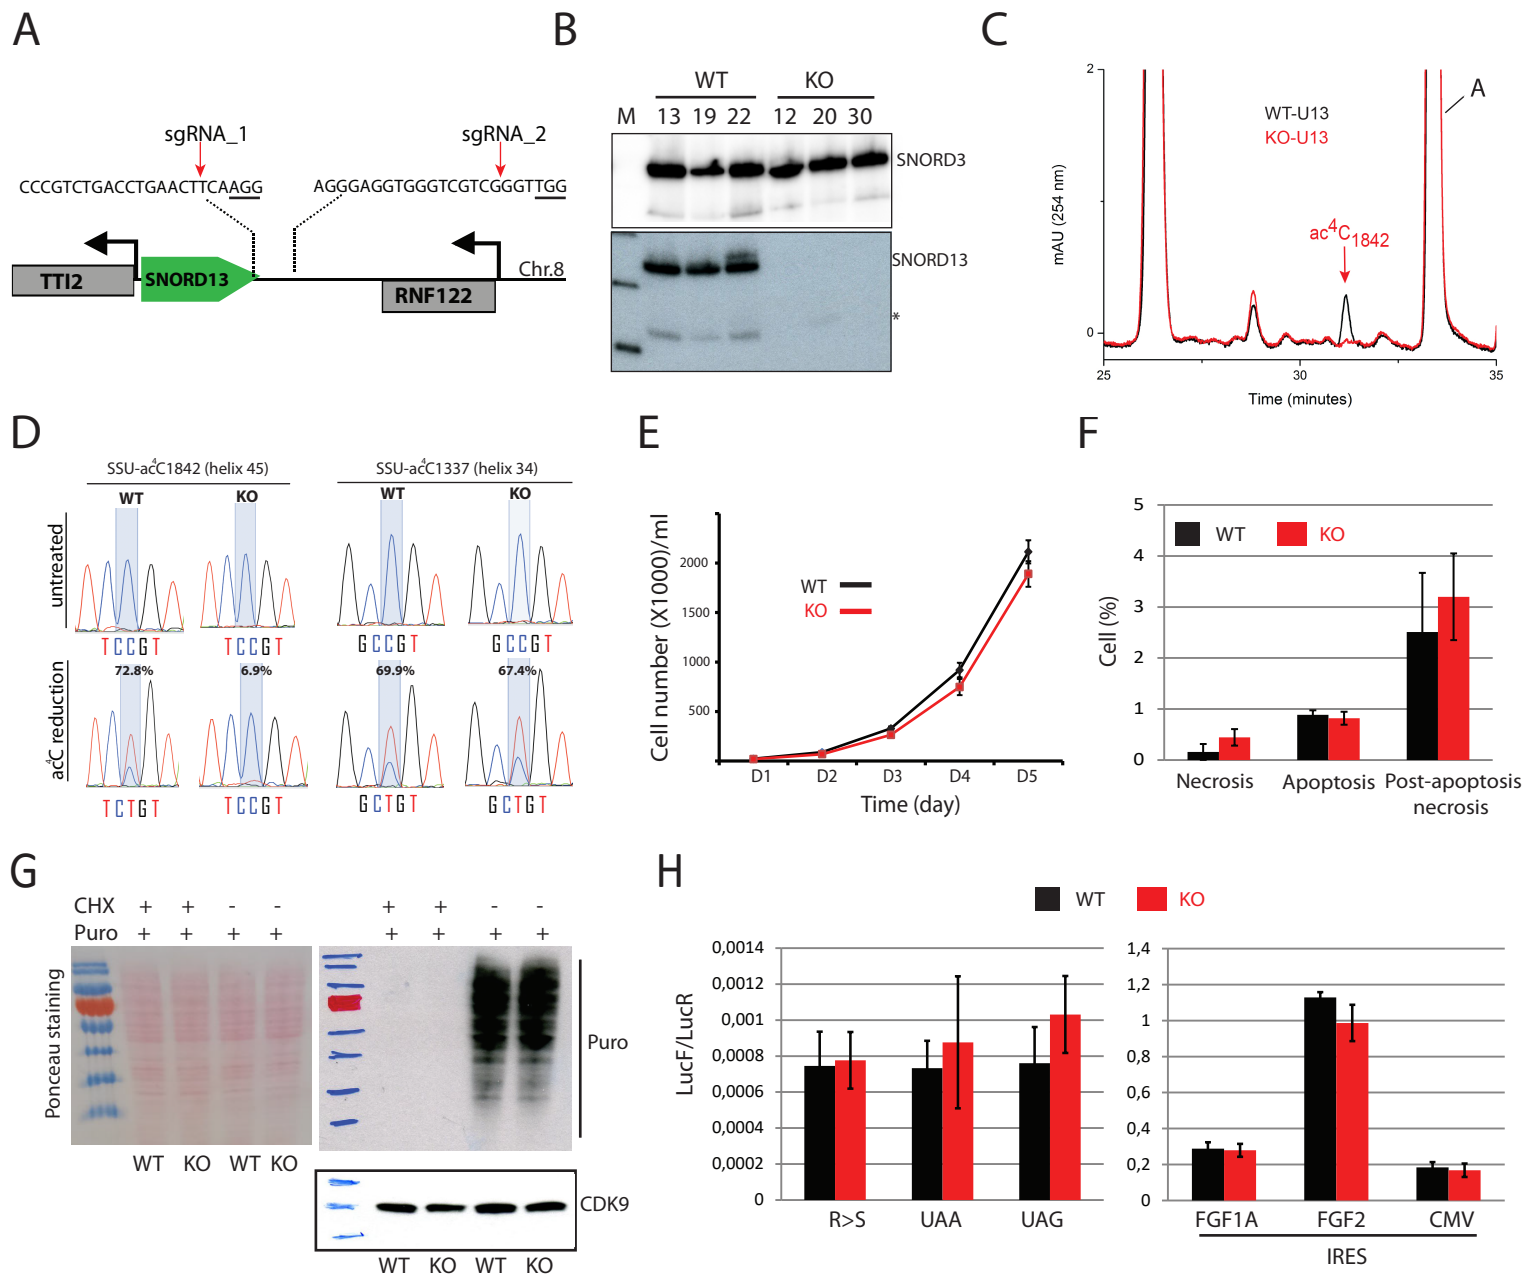



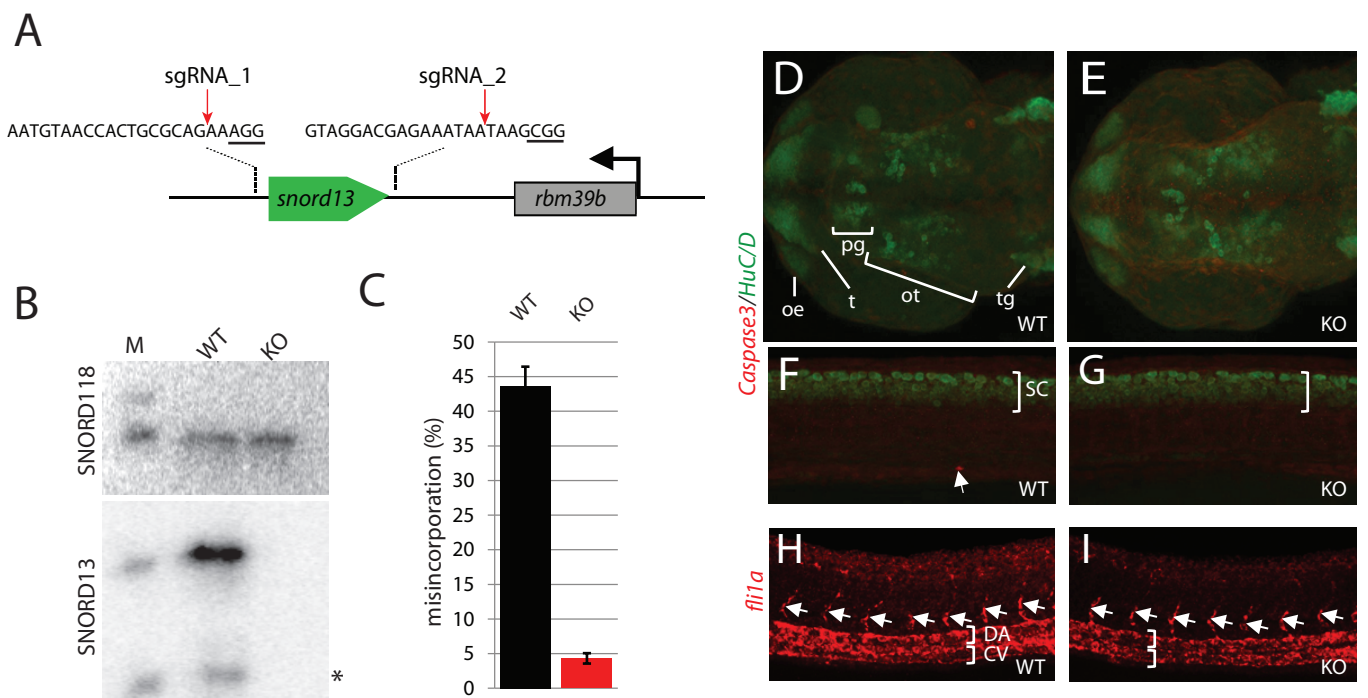

A

| Organisms                                               | Helix 45 | Ac4C                       | SNORD                             | NAT10     |
|---------------------------------------------------------|----------|----------------------------|-----------------------------------|-----------|
| <i>H. sapiens</i>                                       | CCG      | yes (Sharma et al 2015)    | SNORD13 (U13)                     | yes       |
| <i>M. musculus</i> (mouse)                              | CCG      | n.d.                       | SNORD13-like (this study)         | yes       |
| <i>R. norvegicus</i> (rat)                              | CCG      | yes (Thomas et al 1978)    | SNORD13-like (this study)         | yes       |
| <i>G. gallus</i> (chicken)                              | CCG      | yes (Thomas et al 1978)    | GGN86 (Makarova et al 2011)       | yes       |
| <i>X. laevis</i> (frog)                                 | CCG      | n.d.                       | SNORD13-like (this study)         | yes       |
| <i>D. rerio</i> (zebrafish)                             | CCG      | yes (this study)           | SNORD13-like (this study)         | yes       |
| <i>P. marinus</i> (lamprey)                             | CCG      | n.d.                       | SNORD13-like (this study)         | yes       |
| <i>C. intestinalis</i> (sea squirt)                     | CCG      | n.d.                       | SNORD13-like (this study)         | yes       |
| <i>B. floridae</i> (Florida lancelet)                   | CCG      | n.d.                       | SNORD13-like (this study)         | yes       |
| <i>S. purpuratus</i> (purple sea urchin)                | CCG      | n.d.                       | SNORD13-like (this study)         | yes       |
| <i>H. attenuata</i> (star fish)                         | CCG      | yes (this study)           | n/a                               | n/a       |
| <i>A. mellifera</i> (bee)                               | CCG      | yes (this study)           | SNORD13-like (this study)         | yes       |
| <i>A. gambiae</i> (mosquito)                            | CCG      | n.d.                       | not found                         | yes       |
| <i>D. melanogaster</i> (fruit fly)                      | CCG      | yes (this study)           | OR-CD1 (this study)               | yes       |
| <i>B. mori</i> (domestic silk moth)                     | CCG      | n.d.                       | Bm_10 (this study)                | yes       |
| <i>A. labyrinthica</i> (spider)                         | CCG      | yes (this study)           | n/a                               | n/a       |
| <i>C. scutellaris</i> (ant)                             | CCG      | yes (this study)           | n/a                               | n/a       |
| <i>I. scapularis</i> (deer tick)                        | CCG      | n.d.                       | SNORD13-like (this study)         | yes       |
| <i>C. elegans</i> (nematode)                            | CUG      | no (this study)            | not found                         | yes       |
| <i>S. carpocapsae</i> (nematode)                        | CCG      | yes (this study)           | not found                         | yes       |
| <i>H. aspera</i> (snail, mollusk)                       | CCG      | yes (this study)           | n/a                               | n/a       |
| <i>M. galloprovincialis</i> (mussel, mollusk)           | CCG      | yes (this study)           | SNORD13-like (this study)         | yes       |
| <i>A. californica</i> (aplysia, mollusk)                | CCG      | n.d.                       | SNORD13-like (this study)         | yes       |
| <i>L. anatina</i> (brachiopoda)                         | CCG      | n.d.                       | SNORD13-like (this study)         | yes       |
| <i>O. bimaculoides</i> (octopus)                        | CCG      | n.d.                       | SNORD13-like (this study)         | yes       |
| <i>A. viridis</i> (anemona, cnidaria)                   | CCG      | yes (this study)           | n/a                               | n/a       |
| <i>C. hemisphaerica</i> (cnidaria)                      | CCG      | yes (this study)           | SNORD13-like (this study)         | yes       |
| <i>P. gracilis</i> (cnidaria)                           | CCG      | yes (this study)           | n/a                               | n/a       |
| <i>N. vectensis</i> (Starlet sea anemone, cnidaria)     | CCG      | n.d.                       | SNORD13-like (this study)         | yes       |
| <i>D. gigantea</i> (coral, cnidaria)                    | CCG      | n.d.                       | SNORD13-like (this study)         | yes       |
| <i>D. australiensis</i> (sponge)                        | CCG      | yes (this study)           | n/a                               | n/a       |
| <i>Haliclona</i> sp (sponge)                            | CCG      | yes (this study)           | n/a                               | n/a       |
| <i>E. muelleri</i> (sponge)                             | CCG      | n.d.                       | SNORD13-like (this study)         | yes       |
| <i>U. maydis</i> (corn smut fungus)                     | CUG      | no                         | not found                         | yes       |
| <i>A. bisporus</i> (mushroom from Paris)                | CCG      | yes (this study)           | not found                         | yes       |
| <i>S. pombe</i> (fission yeast)                         | CCG      | yes (Taoka et al 2014)     | not found                         | yes       |
| <i>N. crassa</i> (filamentous fungus)                   | CCG      | n.d.                       | not found                         | yes       |
| <i>P. ansarina</i> (filamentous fungus)                 | CCG      | n.d.                       | not found                         | yes       |
| <i>A. niger</i> (filamentous fungus)                    | CCG      | n.d.                       | not found                         | yes       |
| <i>S. cerevisiae</i> (budding yeast)                    | CCG      | yes (Ito et al 2014)       | snR45 (Sharma et al 2017)         | yes       |
| <i>D. discoideum</i> (social amoeba)                    | CCG      | yes (McCarroll et al 1983) | not found                         | yes       |
| <i>P. polycephalum</i> (slime mod)                      | UCG      | yes (this study)           | not found                         | yes       |
| <i>A. thaliana</i> (eudicot)                            | CCG      | yes (Sharma et al 2015)    | snoR105/108/2279 (Kim et al 2010) | yes       |
| <i>O. sativa</i> (monocot)                              | CCG      | n.d.                       | SNORD13-like (this study)         | yes       |
| <i>A. trichopoda</i> (ancestor of angiosperms)          | CCG      | n.d.                       | SNORD13-like (this study)         | yes       |
| <i>N. colorata</i> (water lily)                         | CCG      | n.d.                       | SNORD13-like (this study)         | yes       |
| <i>N. revoluta</i> (Japanese sago palm)                 | CCG      | yes (this study)           | n/a                               | n/a       |
| <i>S. moellendorffii</i> (lycophyte)                    | CCG      | n.d.                       | SNORD13-like (this study)         | yes       |
| <i>P. patens</i> (moss)                                 | CCG      | n.d.                       | SNORD13-like (this study)         | yes       |
| <i>H. cupressiforme</i> (moss)                          | CCG      | yes (this study)           | n/a                               | n/a       |
| <i>M. polymorpha</i> (liverwort)                        | CCG      | n.d.                       | SNORD13-like (this study)         | yes       |
| <i>C. braunii</i> (freshwater algae)                    | CCG      | n.d.                       | SNORD13-like (this study)         | yes       |
| <i>C. reinhardtii</i> (green algae)                     | CCG      | yes (this study)           | not found                         | yes       |
| <i>G. sulphuraria</i> (red algae)                       | CCG      | yes (this study)           | not found                         | yes       |
| <i>C. crispus</i> (red algae)                           | CCG      | n.d.                       | not found                         | yes       |
| <i>Ectocarpus</i> sp (brown algae)                      | CCG      | yes (this study)           | not found                         | yes       |
| <i>P. tricornutum</i> (diatom, microalgae)              | CCG      | yes (this study)           | not found                         | yes       |
| <i>T. thermophila</i> (ciliata)                         | CUG      | no (this study)            | not found                         | yes       |
| <i>P. tetraurelia</i> (ciliata)                         | CCG      | yes (this study)           | not found                         | yes       |
| <i>P. falci-parum</i> (agent of malaria, parasite)      | CCG      | yes (this study)           | not found                         | yes       |
| <i>T. gondii</i> (agent of toxoplasmosis, parasite)     | CCG      | yes (N. Gao, pers. com.)   | not found                         | yes       |
| <i>G. intestinalis</i> (flagellated protozoan parasite) | CCG      | n.d.                       | not found                         | yes       |
| <i>T. vaginalis</i> (flagellated protozoan parasite)    | CGG      | no                         | not found                         | yes       |
| <i>E. gracilis</i> (flagellated green algae)            | CUG      | no                         | not found                         | not found |
| <i>T. brucei</i> (flagellated protozoan parasite)       | CUG      | no                         | not found                         | yes       |
| <i>L. major</i> (flagellated protozoan parasite)        | CUG      | no                         | not found                         | yes       |

B

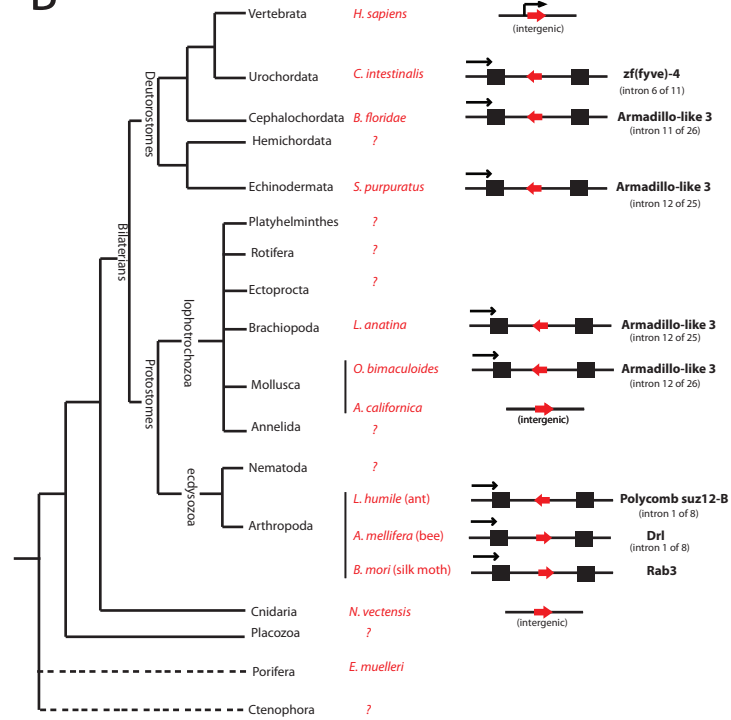

C

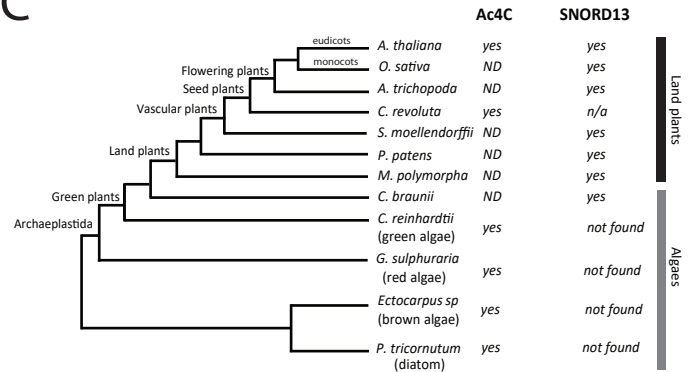

**A**

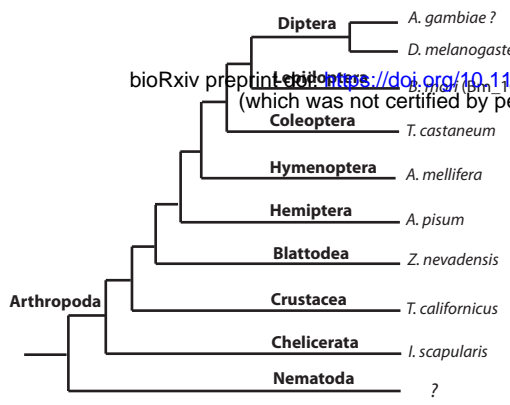

**B**

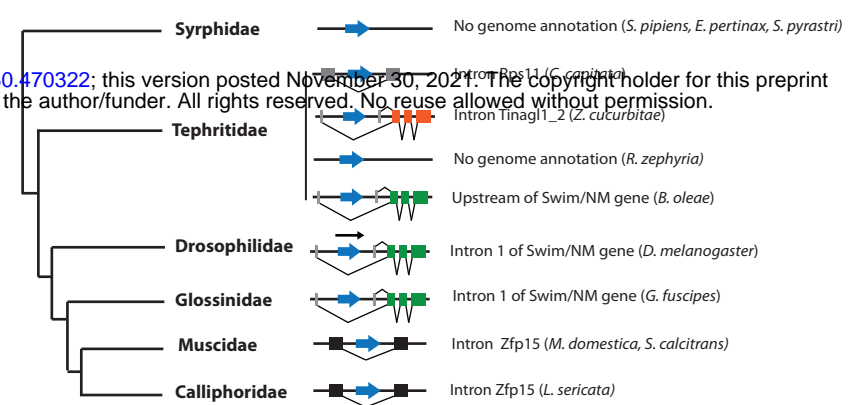

**C**

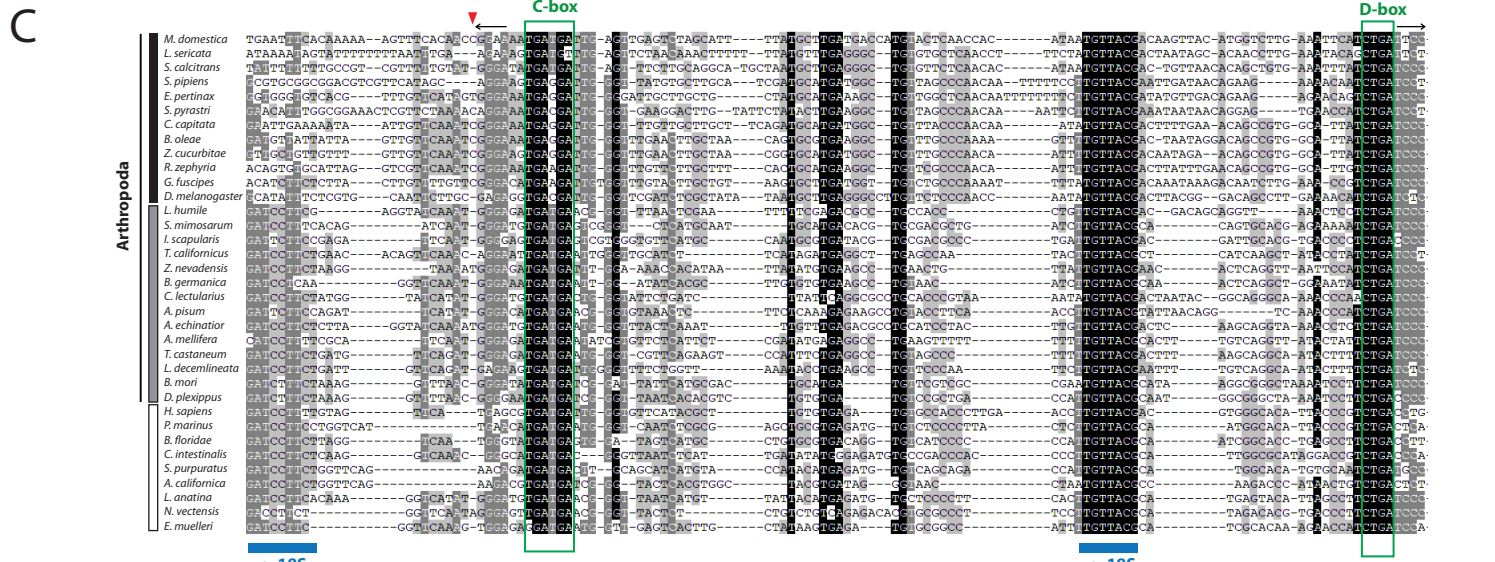

**D**

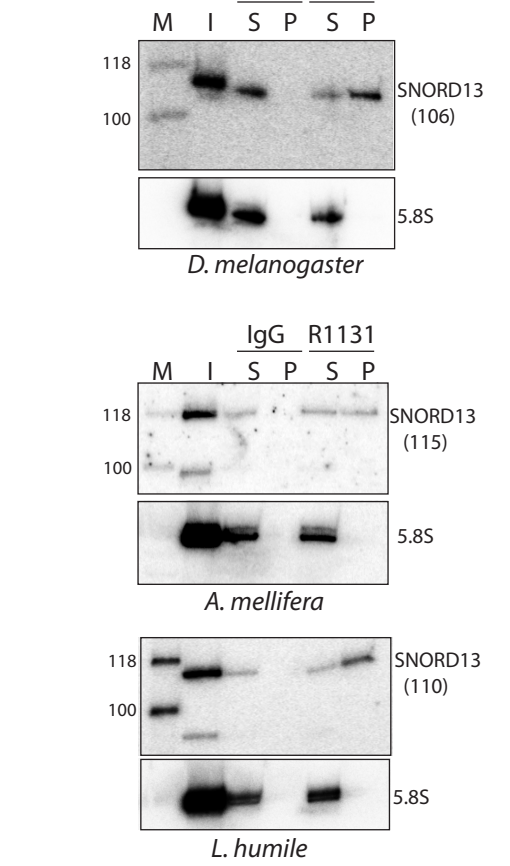

**E**

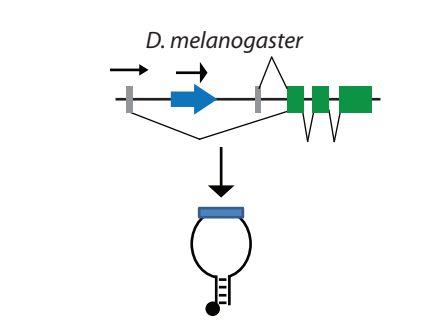

**F**

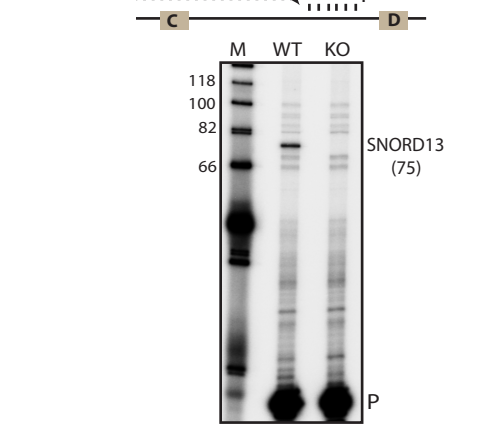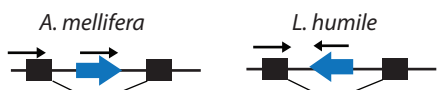

**G**

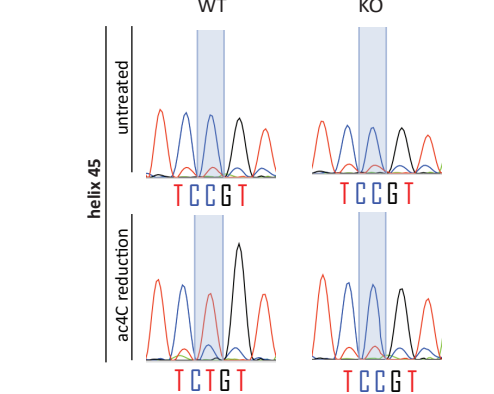

A

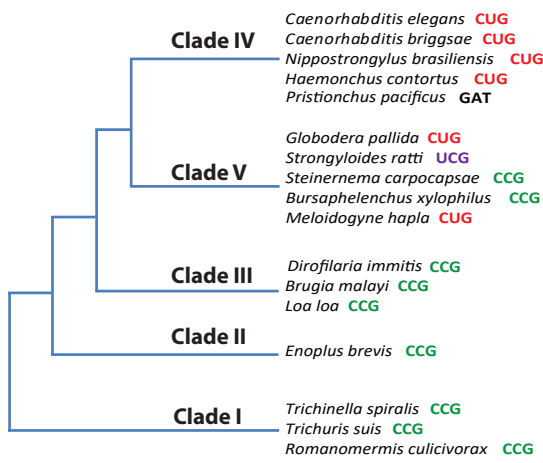

C

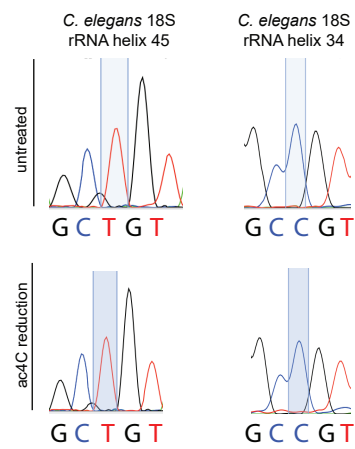

D

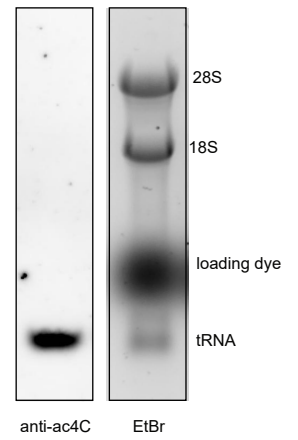

B

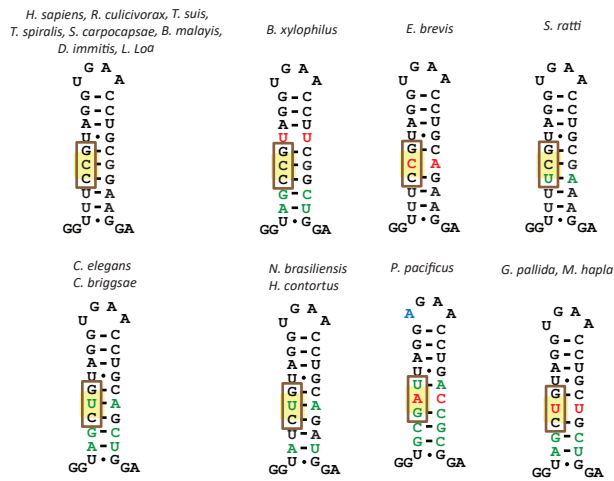

E

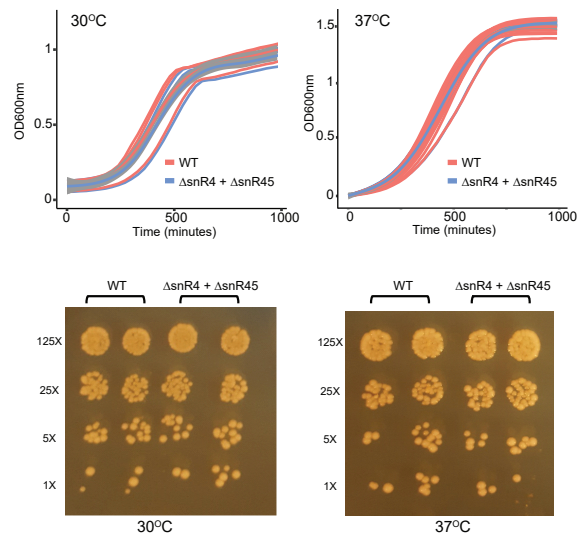

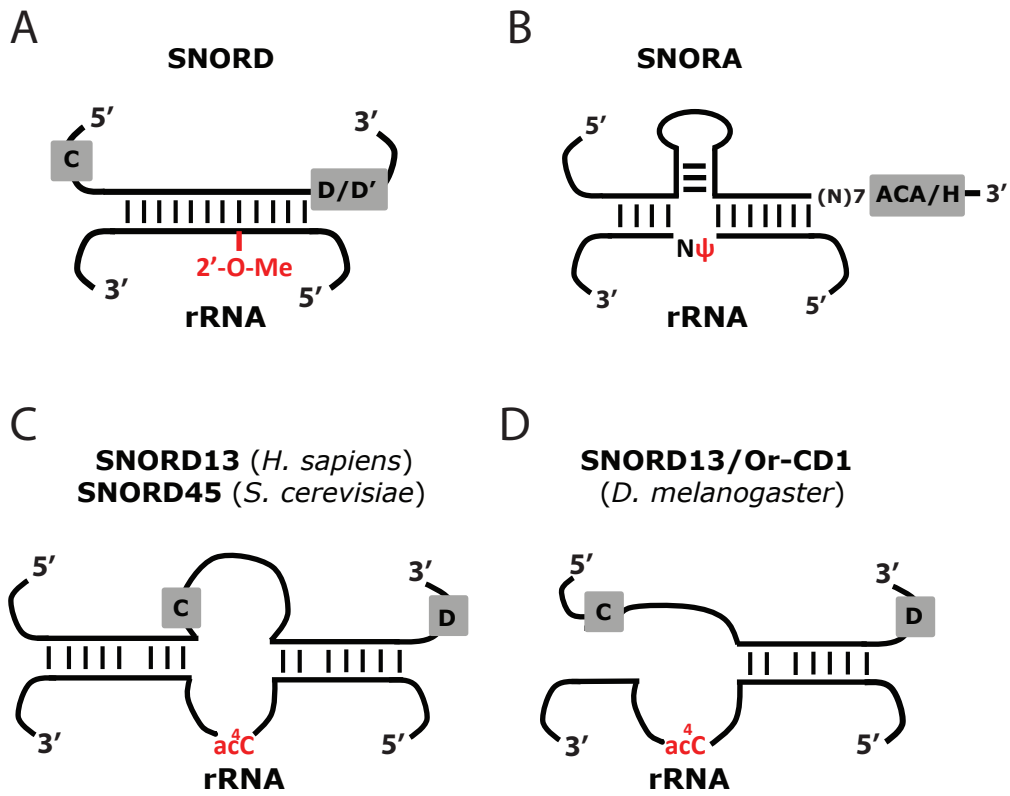

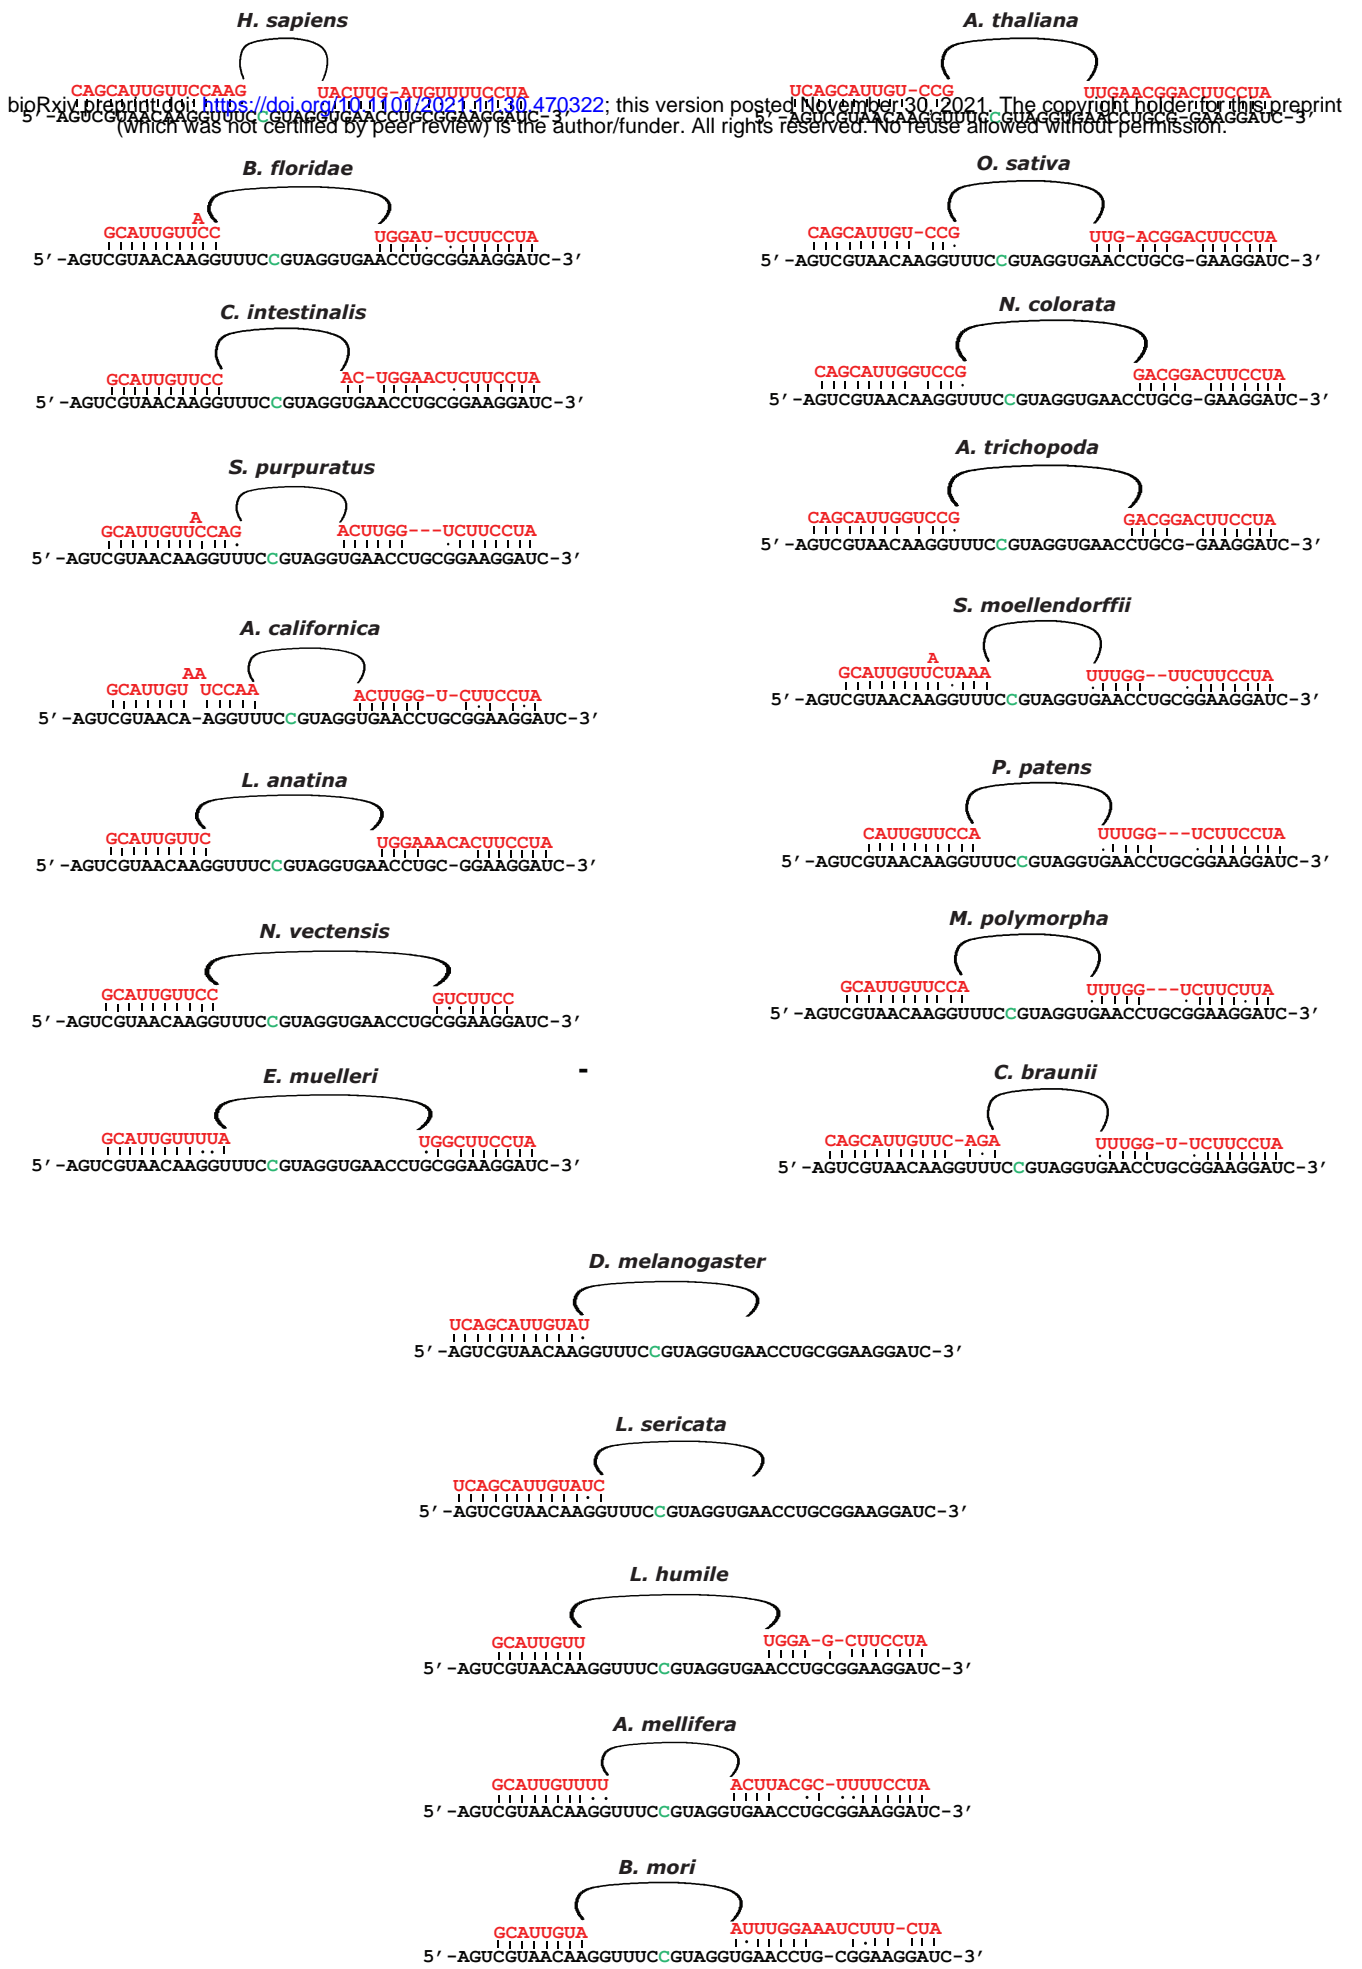

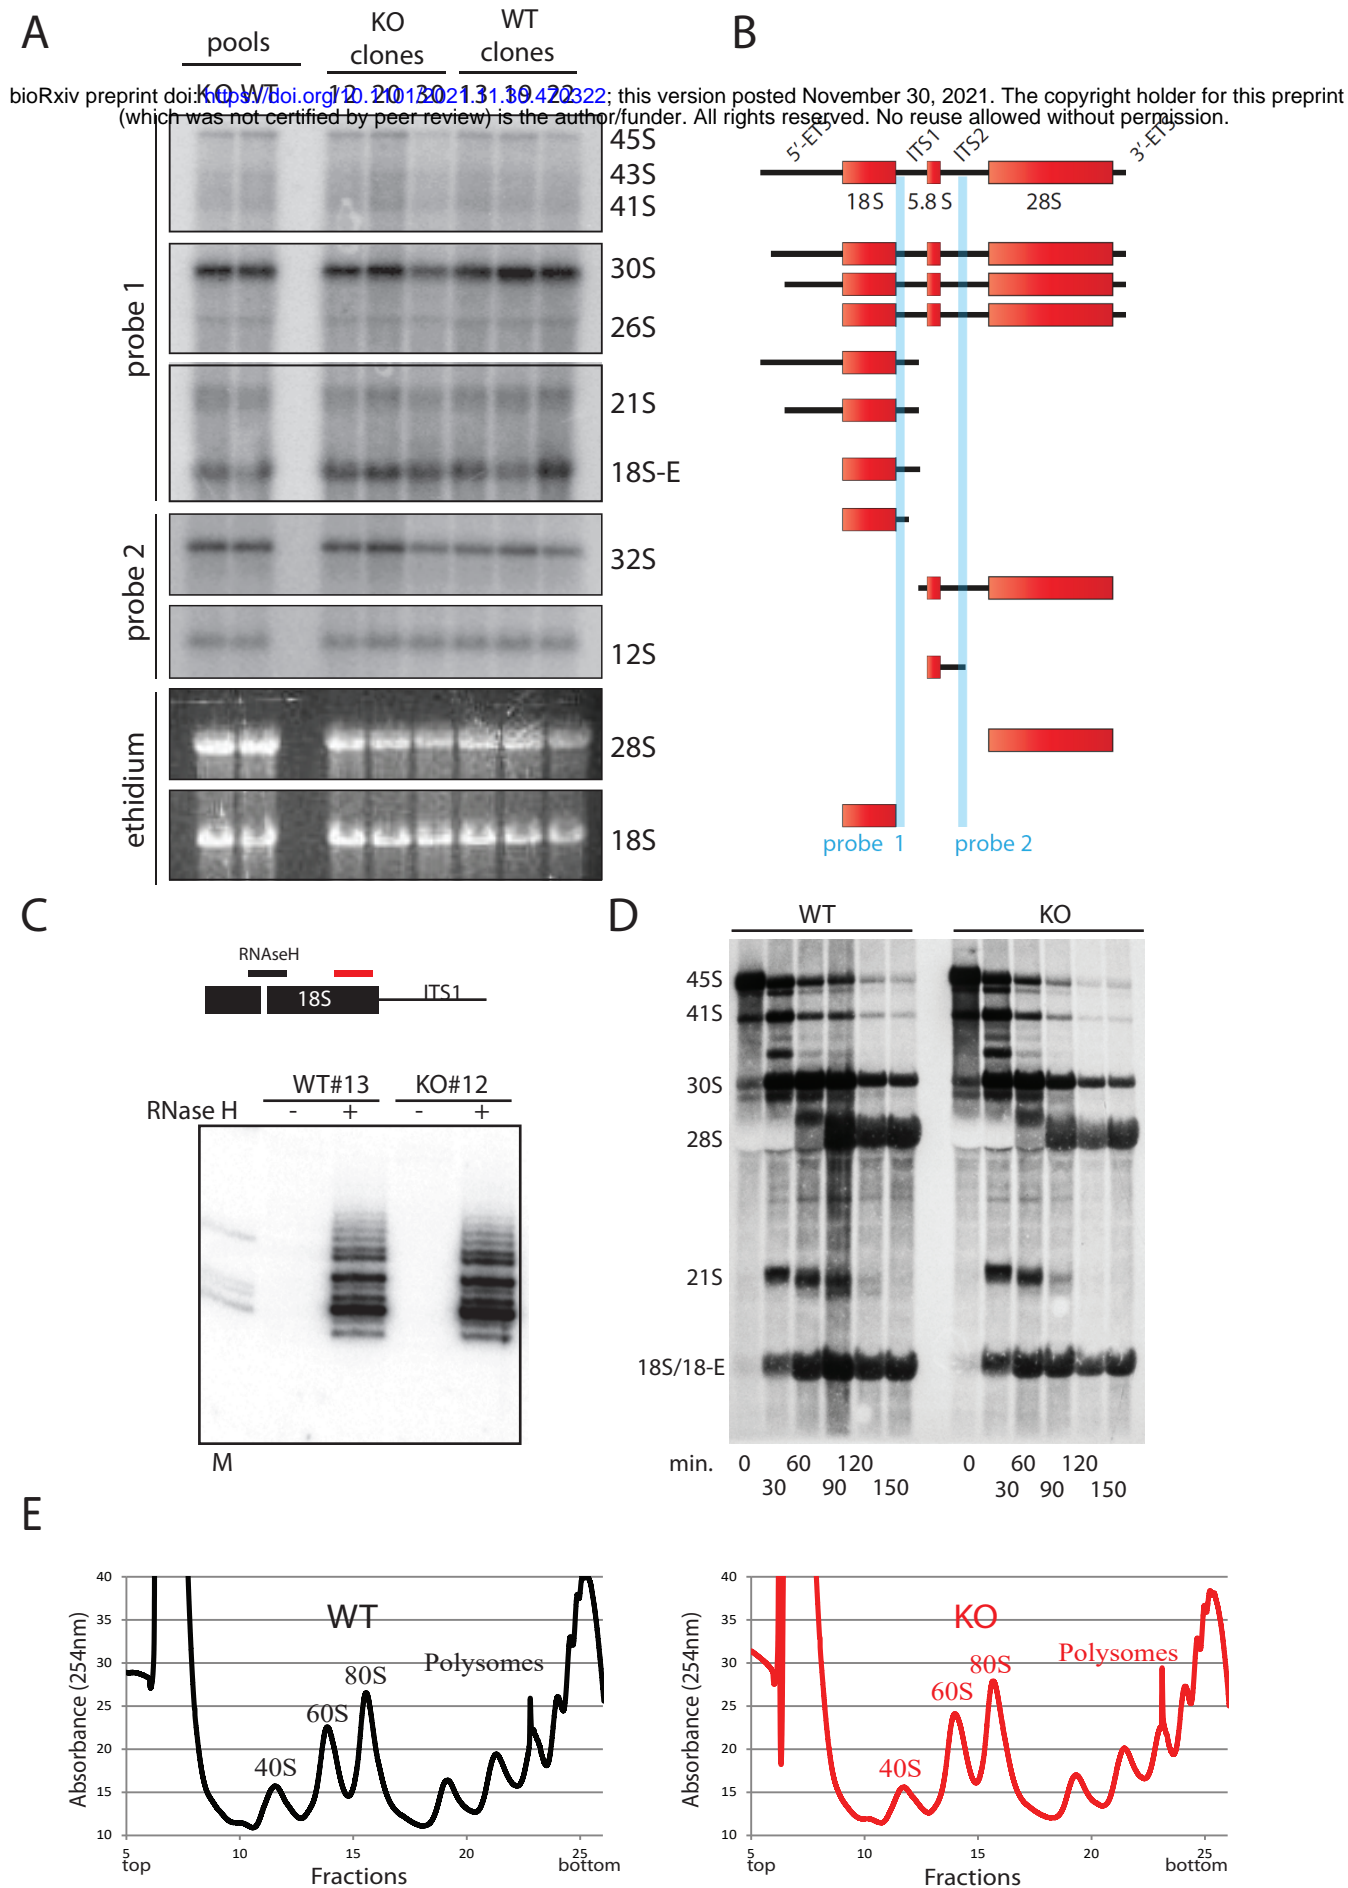

A

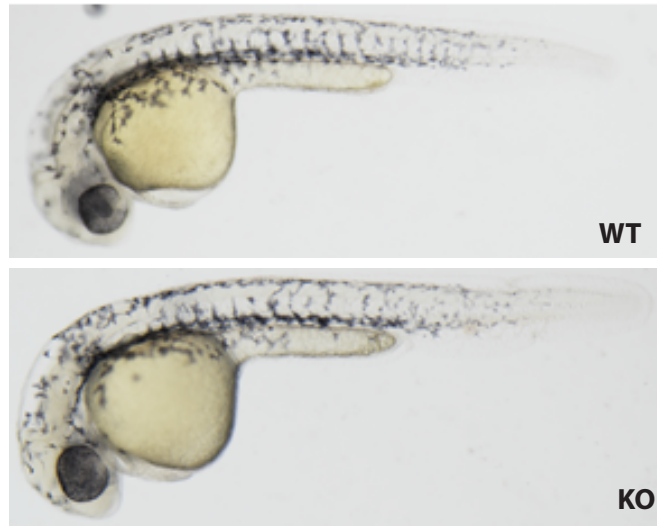

B

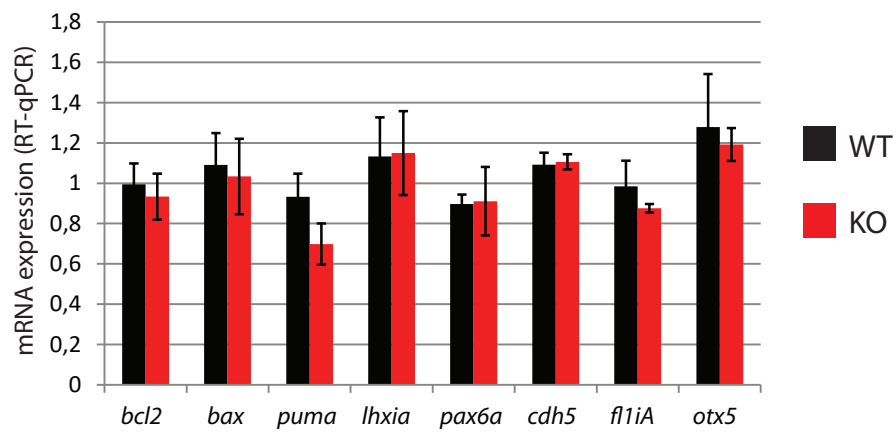



A

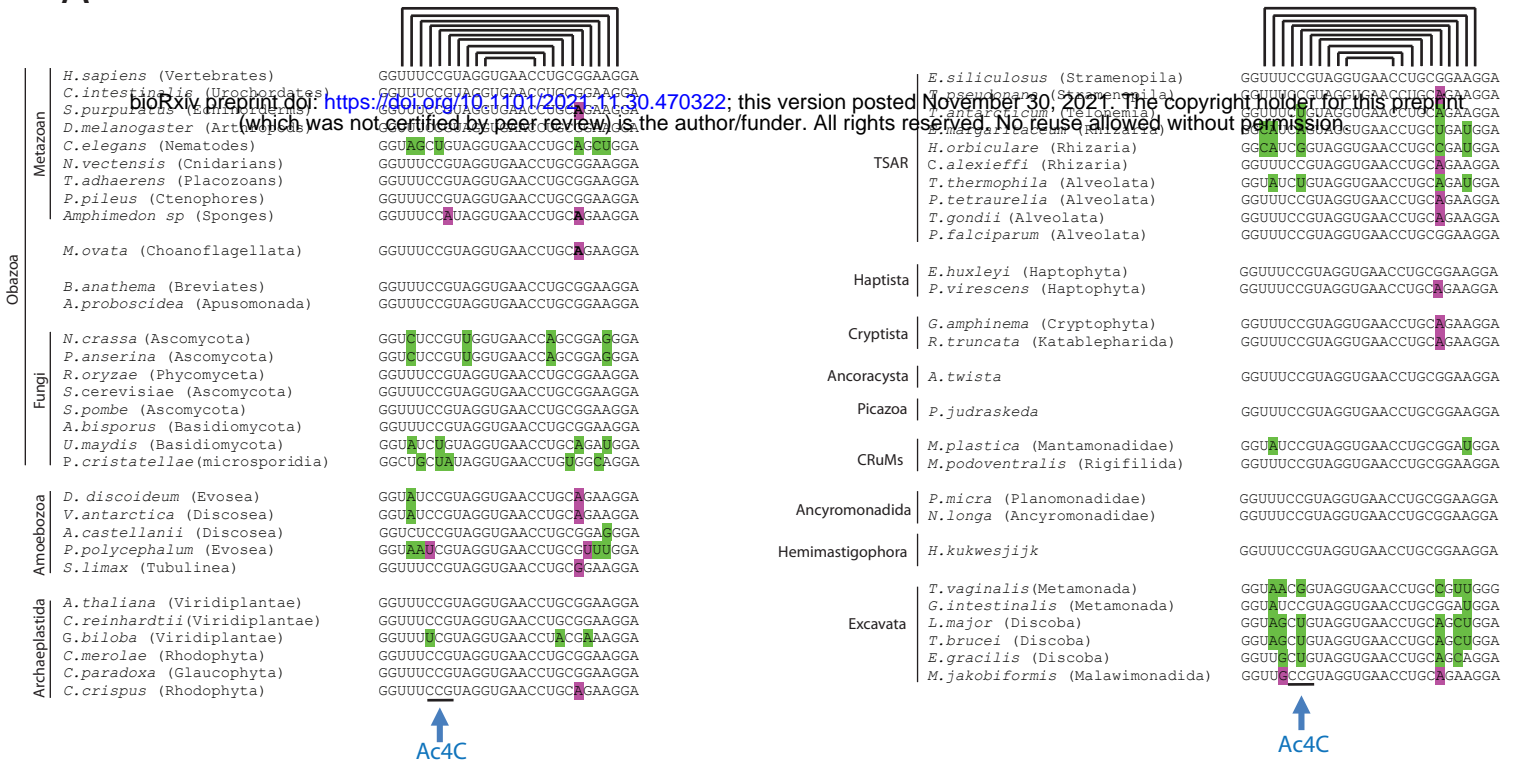

B

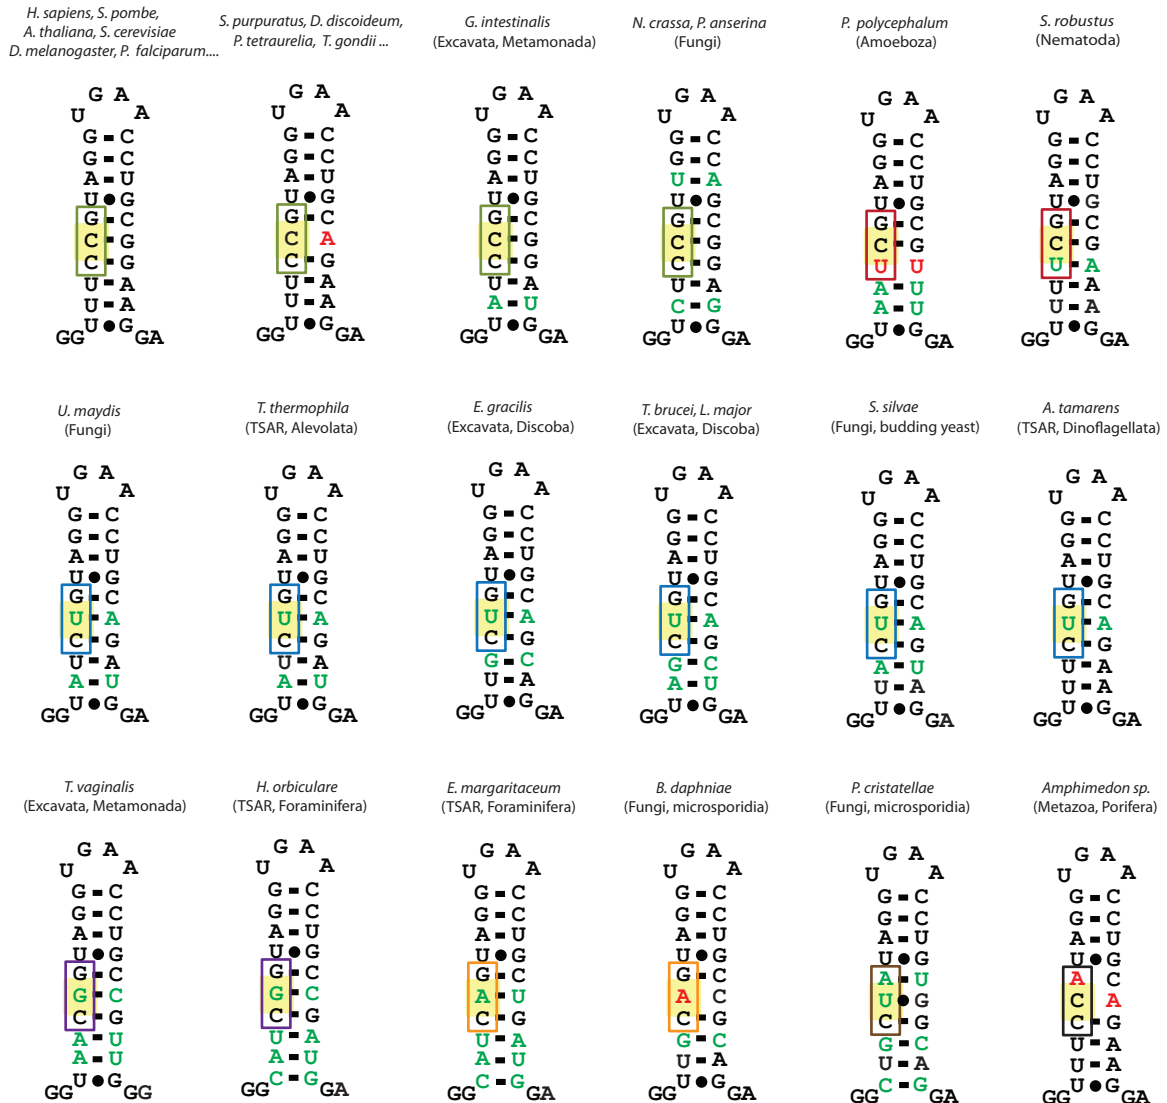

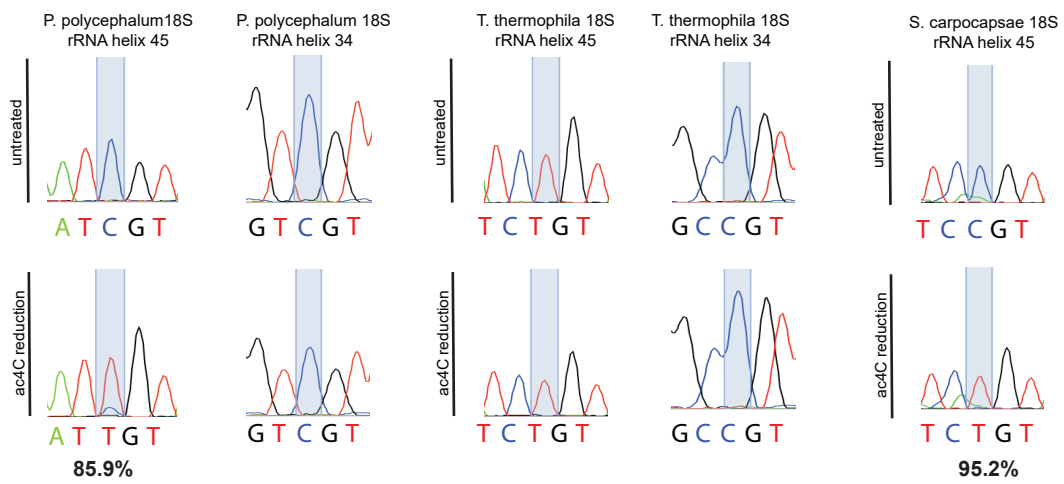

*H. sapiens*

CCG

ac<sup>4</sup>C1842

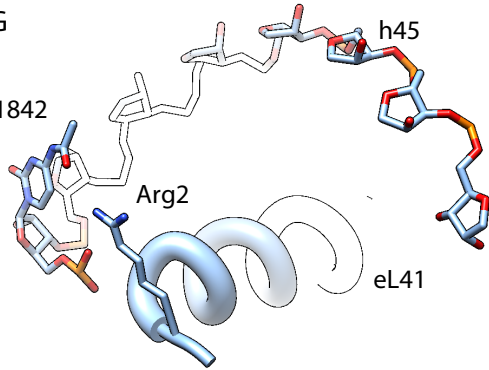

*T. vaginalis*

CGG

G1553

Arg2

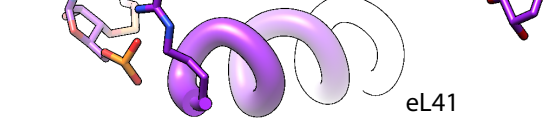

*P. falciparum*

CCG

ac<sup>4</sup>C2065

Arg16

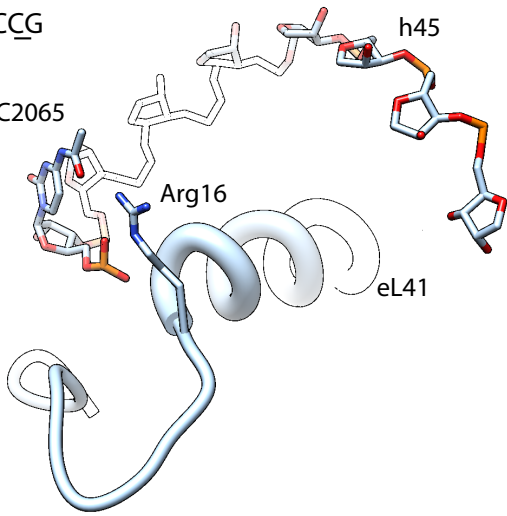

*L. donovani*

CUG

U2176

Arg11

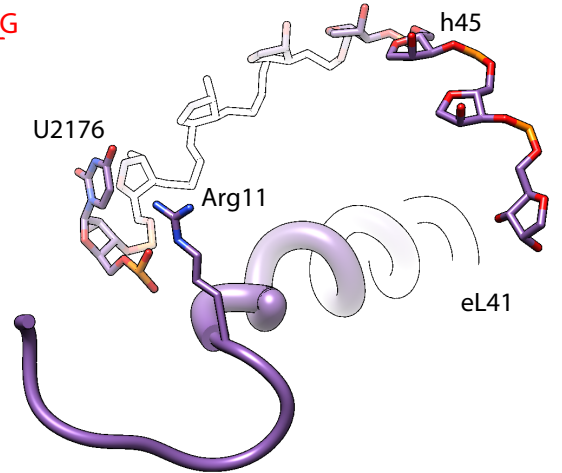

*T. gondii*

CCG

ac<sup>4</sup>C1764

Arg16

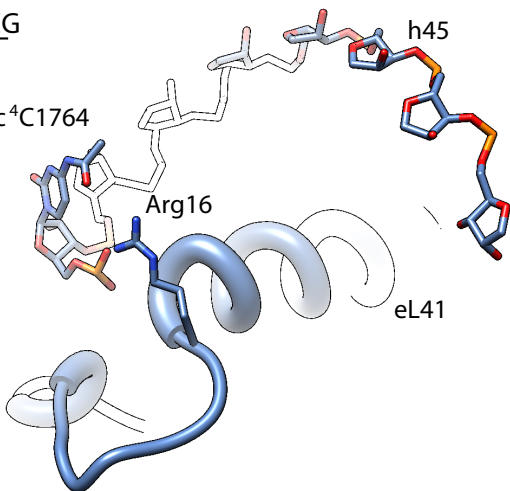

*E. gracilis*

CUG

U2279

Arg11

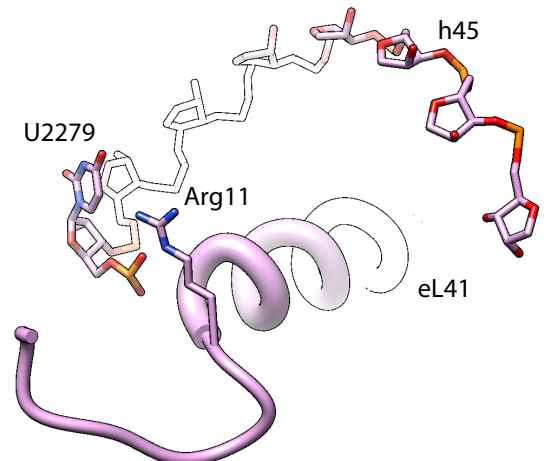

## Supplementary data S1

- **Vertebrata** – A few representative species are listed

```
>Homo_sapiens
GATCCTTTTGTAGTTCATGAGCGTGATGATTGGGTGTTTCATACGCTTGTGTGAGATGTGC
CACCCCTTGAACCTTGTACGACGTGGGCACATTACCCGTCTGACC
>Callithrix_jacchus (monkey)
GATCCTTTTGTAGTTCATGAGCGTGATGATTGGGTGTTTCATACGCTTGTGTGAGATGTGC
CACCCCTTGAACCTTGTACGACGTGGGCACATTACCCGTCTGACC
>Mus_musculus (mouse)
GATCCTTTCTGGTTCATAAAGCGTGATGATTGGGTGTTTCACGCCATTGCGTGACATGTGC
CGCCATAAACCTTGTACGACGTGGGCACATTACCCGTCTGACA
>Oryctolagus_cuniculus (rabbit)
GATCCTTTTTCGTAGTTCATAAAGCGTGATGATTGGGTGTTTCACGCAATTGCGTGAGATGT
GCCACCCTCGAAACCTTGTACGACGCCGGCACATGACCCGTCTGACG
>Erinaceus_europaeus (hedgehog)
GATCCTTTTGTAGTTCATAAGTGTGATGATTGGGTGTTTCATGCGACTGCGTGAGGTGTGC
CACCCATAAACCTTGTACGACGTGGGCACATTACCCGTCTGACA
>Tursiops_truncatus (dolphin)
GATCCTTTTGTAGTTCATAAGTGTGATGATTGGGTGTTTCACGCGCTTGTGTGACATGTGC
TTCCTTCCAACCTTGTACGACTGTGGCACATTACCCGTCTGACA
>Ceratotherium_simum (Rhinoceros)
GATCCTTTTGTAGTTCATAAAGCGTGATGATTGGGTGTTTCACGCGTCTGTGTGAGATGTGC
CTCCCAAAACCTTGTACGACGTGGGCACATCACCCTCTGACG
>Canis_lupus_familiaris (dog)
GATCCTTTTGTAGTTCATAAAGCGTGATGATTGGGTGTTTCACGCCGTTGTGTGACATGTGC
CTCCCTCAAACCTTGTACGACGCCGGCACATTACCCGTCTGACG
>Pteropus_vampyrus (megabat)
GATCCTTTTGTAGTTCATAAAGCGTGATGATCGGGTGTTCATGCTGTTGTGTGAGATGTGC
CGCCCATCTAACCTTGTACGACATTAGGCACATGACCCGTCTGACG
>Loxodonta_africana (Elephant)
GATCCTTTTTCGGTTCATAAAGCGTGATGATTGGGTGTTTCATACGCTCTGTGTGATATGTGC
CTCCCCAAACCTTGTACGACGTGGGCACATTACCCGTCTGACG
>Dasypus_novemcinctus (Armadillo)
GATCCTTTTGTGGTTCATAAAGTATGATGAATGGGTGTTTCACGCGCTTGTGTGAGATGTGC
CTCCCTCAAACCTTGTACGACGTGGGCACATTACCCGTCTGACA
>Monodelphis_domestica (Opossum)
GATCCTTCTGGTTCATACAAGTGTGACTGGGTGTTTCACGCGTTTGTGTGAGATGTGCCG
CCCTTACTTTTCTTGTACGCATAGGTACATTACCCGTCTGATT
>Ornithorhynchus_anatinus (Platipus)
GATCCTTTTCGGTTCATTAATAATGATGATTGGGTGTTTCACGCGCCTGCGTGAGATGTGCC
GCCCTTTGTTACGCATGCGCACATTACCCTTCTGATC
>Gallus_gallus (chicken)
GATCCTTCCGGTTCATAGCAAATGATGAATGGGAGTTGCACGCGGCTGCGTGACGTGTGC
GCCCTTTGTTACGACGTGCACAGCCCCTTCTGAGC
>Anolis_carolinensis (lizard)
GATCCTTCCAGTTCCTTCATGTGATGAGTGGGTGTTTCATGCGCATGCGTGAGATGTGCC
GTCCCAATTGTTACGACAGGGCACAGTACCCATCTGATC
>Xenopus_tropicalis (frog)
GATCCTTCTGGTTCCTTACATGTGATGAGTGGGTATCACACGGCTGTGTGAGATGTGCCT
TCCCGACTTGTACGACTCGGCATAGTACCCATCTGATC
>Takifugu_Rubripes (fugu)
GATCTTTCTGGTTCATGCATGTGATGATTGGTCAAATCACGGATCAATCTGTGAAAGGTG
CAGCCTTCTTGTACGCTATGCGCCTCAGCCTCTCTGATC
>Danio_rerio (Zebrafish)
GATCCTTGAGGTTTCATACAACATGATGATTGGTCTATCACGACTGTTTCGTGAAATGTGCA
GCCCTTTGTTACGACGTGGCACATTGACCCGTCTGATT
>Petromyzon_marinus (lamprey)
```

GATCCTTCCTGGTCATTGAACATGATGAATGGGTCAATCTCGCGAGCTGCGTGAGATGTG  
TCTCCCCTTACTCTTGTTACGCAATGGCACATTACCCGTCTGACT

#### • Urochordata

>*Ciona\_intestinalis*

GATCCTTCTCAAGGTCAAACGGGCATGATGACGGGTTAATCTCATTGATATATGGGAGATGTGCCGACCCACCCC  
TTGTTACGCATTGGCGCATAGGACCGTCTGACCCA

#### • Cephalochordata

>*Branchiostoma\_floridae*

GATCCTTCTTAGGTCAATGGGTATGATGAGTGGATAGTCATGCCTGTGCGTGACAGGTGTCATCCCCCATTTGTT  
ACGCAATCGGCACCTGAGCCTTCTGACCTT

>*Branchiostoma\_belcheri*

GATCCTTCTTAGGTCAATAGGTATGATGAGTGGTTCCCTCATGCCTGTGCATGACAGGTGTTGTCCCACCATTGTT  
ACGCATTCAACACCTGAGCCCTCTGACCTT

>*Branchiostoma\_lanceolatum*

GATCCTTCTTAGGTCAATAGGTATGATGAGTGGATACTCATGCCTGTGCGTGACAGGTGTCATCCCCCATTTGTT  
ACGCAATCGGCACCTGAGCCCCCTGACCTT

#### • Echinodermata

>*Strongylocentrotus\_purpuratus*

GATCCTTCTGGTTCAGAACAGATGATGACTTGCAGCATCATGTACCATACATGAGATGTGTCAGCAGACCATTGTT  
TACGCATGGCACATGTGCAATCTGATGCC

>*Lytechinus\_variegatus*

GATCCTTCTGGTTCAGAACAGGTGATGACTTGCATGATCATGTAACTATACATGAGATGTGTCAGCAGACCATTG  
TTACGCAAGGCACATATGCAATCTGATGCT

>*Patiria\_miniata*

GATCCTTCTAAGGTCAAACGGGAGATGATGATTGGTTGATCATGTCTTAGTACATGAGACGTGTGACCATTTTAT  
CCTTGTTACATACCATCACGTTGACCATCTGATCCC

>*Asterias\_rubens*

GATCCTTCTAAGGTCAAACGGGAGATGATGATTGGTTATTTCATGCTCTATACATGAGACATGTCACCATTTATCCT  
TGTTACATTCTGACATGAAACCATCTGATCCC

>*Anneissia\_japonica*

GATCCTTCCATAATCATGGAATAATGATGAAAGGTATTTTCATGCACCATGCATGAGAGGGGCTGACCTCCCTACT  
TGTTACGTGAAGCACCTCACCTATCTGAATCC

>*Acanthaster\_planci*

GATCCTTCTAAGGTCAATTGGGAGGTGATGATTGGTTTATCATGTCTGTACATGAAACGTGTGCCCATGGTTAC  
GCACTGACACGTTAGCCATCTGATCCC

#### • Mollusca

>*Mytilus\_galloprovincialis*

GGCCTTCCTGGTTTATACATTATGATGAATAGGGTAATCATGTGACTGCATGAGACATG  
TCTCCTTCTAACTTGTTACGCAGAAGGCATGTTCCCATCTGAATAA

>*Pecten\_maximus*

GACCTTCTTTACTGATGGTTCATTAAAGAATGATGAATGGGTTTTTCAGGCGTCTGTCTGACACATGTCGTCTCC  
ATTGTTACGCATGACATGTTACCCAACCTGACTCC

>*Pomacea\_canaliculata*

GATCCTTCTGGTTCAAACGCATGATGAATGGGAAGTCACGCGACTGCGTGATGGTGCCAACCTCCAGTTACGCA  
ATGGCACATCCCGTCTGACTTG

>*Crassostrea\_virginica*

GTTAATGAAACCTTCTGGTTCTGTCAAATGATGACTGGCTGGGACATGCAACATGCATGACACATGCCACCGACT  
TGTTACGTTAGGCATGTTTACCCTCTGATTCA

>*Aplysia\_californica*

GATCCTTCTGGTTCAGAAGACGTGATGATCGGGTACTCACGTGGCTACGTGATAGGGTAACTAATGTTACGCCA  
AGACCCATAACTGTCTGACTCT

>Mizuhopecten\_yessoensis  
GACCTTCTTTACTGATGGTTCAATTTAGAATGATGAAAGGTTTCTCAGGCGTCTGTCTGAGACATGTCACCTCCAT  
TGTTACGCACGACATGTTACCTCTCTGACTCT  
>Octopus\_bimaculoides  
GATCCTTCTGTGTTTCTGAGAAATGATGAATCGGGTTATCACGTAATGATATGTGAGACATGTCGCCGTTTACCT  
TGTTACGACTATACGACATGACACCCTGTCTGATTCT  
>Octopus\_sinensis  
GATCCTTCTGAGTTCTGAGAAATGATGAATCGGGTTATCACGTAATGATACGTAATGAGACATGTCGCCGTTTACCT  
TGTTACGACTATACGACATGACACCCTGTCTGATTCT  
>Batillaria\_attramentaria  
GATCCTTCTGTTTCTGAAACACATGATGAATGGAGTACATGCGTCTGCATGACAGTGCCAGCCTCCTTGTTACGCT  
CAGGCACTCAGCCATCTGACTCA  
>Crassostrea\_gigas  
GTTAATGAAACCTTCTGGTTCTGTTACATGATGACTGGTGGGGACATGCTCCATGCATGAGACATGCCGCCGGCT  
TGTTACGCTAGGCATGTGTACCTTCTGACTCA  
>Lottia\_gigantea  
GGTAATGACCTTCTAGGTCATATGGGATATGATGAACCGGTTAATCTCAGGCATTGTGGAGATATGTGTCAGCCA  
ACCTTGTTACGCTCTGACACAGAGAACCATCTGATCCC  
>Gigantopelta\_aegis  
GGCCTTTTGGTTTCAATAAAATGATGAATGGGTTATTCATGTGTCTACATGAGATATGTCTCCAGCATTGTTACG  
CACAGACATATTACCTCTCTGATA

#### • Brachiopoda

>Lingula\_anatina  
GATCCTTCTCACAAGGTCATATGGGATGTGATGAACCGGTTAATCATGTTATTACATGAGATGTGCTCCCCTTAC  
TTGTTACGCATGAGTACATTAGCCTTCTGATCCC

#### • Cnidaria

>Clytia\_hemisphaerica  
GATCCTTCTGGTTCAACGGAATGATGAGTCGGTCTTCACTTTACGTAAGTGATACGTGTTTACGCCAACCTTG  
TTACGCACGGGCACGTCACCGAGTCTGATCC  
>Acropora\_millepora  
GAATCCTTCTCAGGATTTAACAAGGGATATGATGAGTGGTTACTTCACTGGTACGTGAGACGTGTCACCCTTT  
CGTTACGACACCGACACGAGACCTCTCTGATCCC  
>Acropora\_digitifera  
GAATCCTTCTCAGGATTTAACAAGGGATATGATGAGTGGTACTTCACTGGTACGTGAGACGTGTCACCATTT  
CGTTACGACACCGACACGAGACCTCTCTGATCCC  
>Nematostella\_vectensis  
GACCTTCTGGTTCAATAGGGAGTTGATGAACCGGTTACTCTCTGTCTGTCAGAGACACGTGCGCCCTTCCCTTGT  
ACGCATAGACACGTGACCTTCTGATCCC  
>Pocillopora\_damicornis  
TATCCTTCTGGTTTCAATGAGGAGATGATGATTGGTCCAATCACTGTTCCATCAGTGAGACGTGTCCTCAACTTGT  
TACGCATAGACACGTGACCTCTCTGATCCT  
>Stylophora\_pistillata  
CATCCTTCTGGTTTCAATGAGGAGATGATGATCGGTTCCAATCACTGCTCTATCAGTGAGATGTGTCCTCATCTTGT  
TACGCATAGACACGTGACCTCTCTGATCCT  
>Dendronephthya\_gigantea  
GATTCTTCAATGGTTTCAATAGGGAGATGATGATTGGTTAATCACCTCATTAGGTGATAAGTGTCGTCATTTTTTG  
TTACGCATAGACACTTGCCCATCTGATCCC  
>Paramuricea\_clavata  
TCCTTCAATGGTTTCAATAGGGAGATGATGATTGGTTAATCACCTCATTAGGTGAGAAGTGTCGTCATAATTTGTT  
ACGCATAGACACTTGACCTCTCTGAT  
>Exaiptasia\_pallida  
GACTTCTGGTTTCAATGCGGAAGTGAATGGGTTTTCACTTTTCTTAGTGAGACGTGTCCTCTCTGTTTAC  
GCACGACACGTAACCCATCTGATCCC  
>Actinia\_tenebrosa  
GCCTTCAATGGTTTCAATGCGGAAGTGAATGGGTTAATCGCTAGTATTAGTGAGACGTGTCACCCACCAATGTT  
ACGCACAGACACGTGACCTCCTGATCCC

>Actinia\_equinia

GGCCTTCATGGTTCATGCGGGAAGTGATGAACTGGGTAATCACTAGTATTAGTGAGACGTGTCACCCACCAATGT  
TACGCAAAGACACGTGACCCTCCTGATCCC

## • Porifera

>Ephydatia\_muelleri

GATCCTTCGGTTCAAAGTGGAGAGGATGAATGGTTGAGTCACTTGCTATAAGTGAGATGTGCGGCCATTTTGTTA  
CGCATCGCACAAAGAACCATCTGATCCA

## • Arthropoda

>Lucilia\_sericata

AGAAAGTGATGTTTTGAGTTCTAACAACTTTTTTTATGTTTGAGGGCTGTGTGCTCAACC  
TTTCTATGTTACGACTAATAGCACAACTTGAAATACAGCTGATTCT

>Stomoxys\_calcitrans

GGGATATGATGATTGAGTTTCTTGACAGGCATGCTAATGCTTGAGGGCTGTGTTCTCAACA  
CATAATGTTACGACTGTTAACACAGCTGTGAAATTTATCTGATCCC

>Syrirta\_pipiens

AGGAAGTGAGGATTGGGTTATGTGCTTGATCGATGCATGATGGCTGTTAGCCCAACAAT  
TTTTCTTGTACGAATTGATAACAGAAGAAAACAATCTGATCCT

>Eristalis\_pertinax

GGGAAATGAGGATTGGGATTGCTTGCTGCTATGCATGAAAGCTGTTGGCTCAACAATTT  
TTTTCTTGTACGATATGTTGACAGAAGAGAACAGTCTGATCCC

>Scaeva\_pyrastris

AGGAAATGACGATTGGGTGAAGGACTTGTATTCTATACTTGAAGGCTGTTAGCCCAACAA  
AATTCTTGTACGAAATAATAACAGGAGTGAACCATCTGATCCT

>Ceratitis\_capitata

GGGAAATGAGGATTGGGTTTGTGCTTGCTTCAGATGCATGATGGCTGTTTACCCAAACAA  
ATATGTTACGACTTTTGAAACAGCCGTGGCATTATCTGATCCC

>Bactrocera\_tryoni

GGGAAATGAGGATTGGGTTTGAACCTTGCTAACTATGCATGATGGCTGTTTGCCCAACAAT  
TTTGTTACGACTAATAGAACAGCCGTGGCATTATCTGATCCC

>Bactrocera\_oleae

GGGAAATGAGGATTGGGTTTGAACCTTGCTAACAGTGCCTGAAGGCTGTTTGCCCAAAAAGT  
TTTGTTACGACTAATAGGACAGCCGTGGCATTATCTGATCCC

>Bactrocera\_latifrons

GGGAAATGAGGATTGGGTTTGAACCTTGCTAGCAATGCGTGAAGGCTGTTTGCCCAACAAT  
TTTGTTACGACTATTAGAACAGCCGTGGCATTATCTGATCCC

>Rhagoletis\_zephyria

GGGAAATGAAGATTGGGTTTGTCTTCTGCTTCACTGCATGAAGGCTGTTGCGCCCAACAAT  
TTTGTTACGACTTATTTGAACAGCCGTGGCATTGTCTGATCCC

>Glossina\_austeni

GGGGCGTGAAGATTGTGGTTTGTACTTGCTGTAAGTGCTTGATGGTTGTCTGCCCAAAAC  
TTAATGTTACGACAAATAAAGACAACCTTGAAACCGTCTGATCCC

>Glossina\_pallidipes

GGGGCGTGAAGATTGTGGTTTGTACTTGCTGTAAGTGCTTGATGGTTGTCTGCCCAAAAC  
TTAATGTTACGACAAATAAAGGCAACCTTGAAACCGTCTGATCCC

>Glossina\_morsitans

GGGGCGTGAAGATTGTGGTTTGTACTTGCTTTAAATGCTTGATGGTTGTCTGCCCAAAAC  
TTAATGTTACGACAAATAAAGGCAACCTTGAAACCGTCTGATCCC

>Glossina\_brevipalpis

GGGAAGTGACGATTGTGGCATGTACTTTCTTTAAATGTTTGATGGTTGTCTGAGCACAATA  
TTAATGTTACGACTGATAAGACAGCCTTGAAACCATCTGATCCC

>Glossina\_palpalis

GGGACATGAAGATTGTGGTTTGTACTTGCTGTAAGTGCTTGATGGTTGTCTGCCCAAAAT  
TTTATGTTACGACAAATAAAGACAATCTTGAAACCGTCTGATCCC

>Glossina\_fuscipes fuscipes

GGGACATGAAGATTGTGGTTTGTACTTGCTGTAAGTGCTTGATGGTTGTCTGCCCAAAAT  
TTTATGTTACGACAAATAAAGACAATCTTGAAACCGTCTGATCCC

>*Drosophila\_melanogaster*  
GAGAGGTGACGATTGGGTTTCGATCTCGCTATATAATGCTTGAGGGCCTTGTTCTCCCAAC  
CAATATGTTACGACTTACGGGACAGCCTTGAAAACATCTGATCTC

>*Drosophila\_ananassae*  
GAGAGGTGAAGATTGGGCTAGGTCTCGCGAACTGATGCTTGAGGGCCTTGTTCTCCCAAC  
CAATATGTTACGACTTACGGAACAGCCTTGAAACGATCTGATCTC

>*Drosophila\_simulans*  
GAGAGGTGACGATTGGGTTTCGATCTCGCTATAAAAATGCTTGAGGGCCTTGTTCTCCCAAC  
CAATATGTTACGACTTACGGGACAGCCTTGAAAACATCTGATCTC

>*Drosophila\_sechellia*  
CGAGAGGTGACGATTGGGTTTCGATCTCGCTATAAAAATGCTTGAGGGCCTTGTTCTCCCAA  
CCAATATGTTACGACTTACGGGACAGCCTTGAAAACATCTGATCTC

>*Drosophila\_yakuba*  
GAGAGGTGACGATTGGGTTTCGATCTCGCTATATAATGCTTGAGGGCCTTGTTCTCCCAAC  
CAATATGTTACGACTTACGGGACAGCCTTGAAAACATCTGATCTC

>*Drosophila\_erecta*  
GAGAGGTGACGATTGGGTTTCGATCTCGCTATATAATGCTTGAGGGCCTTGTTCTCCCAAC  
CAATATGTTACGACTTACGGGACAGCCTTGAAAACCTCTGATCTC

>*Drosophila\_pseudoobscura*  
GAGAAGTGAGGATTGGGCCAGGTCTCGCAATACTATGCTTGAGGGCCTTGTTCTCCCAAC  
AAATATGTTACGACTTGTGGAACAGCCTTGAAAACATCTGATCTC

>*Drosophila\_persimilis*  
GAGAAGTGAGGATTGGGCCAGGTCTCGCAATACTATGCTTGAGGGCCTTGTTCTCCCAAC  
AAATATGTTACGACTTGTGGAACAGCCTTGAAAACATCTGATCTC

>*Drosophila\_mojavensis*  
GAGAGGTGAAGATTGGGTTATTCTTTCCTTAACCATGCTTGAAGGTTCTGTTTGCCCAAC  
CAAATATGTTACGATTACAAAACAGCCTTGAAAACATCTGATCTC

>*Drosophila\_virilis*  
GAGAGGTGAAGATTGGGTTACTCTTGCCTTAACCATGCTTGAGGGTCTTGTTTCGCCCAAC  
TTATACGTTACGACTAACAGAACAGCCTTGAGAACATCTGATCTC

>*Drosophila\_grimshawi*  
GAGAAGTGAGGATTGGGTTAATCTTGCCTTAACCATGCTTGAGGGTCTTGTTTCGCCCAAC  
ATTTTGTACGACTAACAGAACAGCCTTAGGATAACATCTGATCTC

>*D. willistoni*  
GAGGTGTGAGGATTGGGTTTAGTTCTAGCATTTCATGCTTGATCGCTGTGTTTCGCCCA  
ACTGTTTATGTTACGACTAAAGAACAGCCATGAGAAACATCTGATCTC

>*Frankliniella\_occidentalis*  
GATCCTTCTAGGTTTAAACGGGAATTGATGAATGGATTATCAAACGATACATTTGTTTGAA  
GCCTGAGTCTATCTTGTACGACTTGTTCAGGCGAAACCTATCTGATCCCTC

>*Melanaphis\_sacchari*  
GATTCTTCCAGATTCATATGGGACATGATGAACGGGTTAATCTCTTCTTGAAGAGAAGC  
CTGTGCCCTCACACTTGTTACGTATTAACAGGTCAAACCTATCTGATCCT

>*Diaphorina\_citri*  
GATCCTTCTGTGATTGAAATGGGATATGATGAATGGGGTATGTCACGTGACTCCGTGAA  
GCCTACACTCCTTACCTTGTTACGATTAGGTAGGCGAAACCTCTCTGATCCC

>*Cimex\_lectularius*  
GATCCTTCTATGGTATCATATGGGATGTGATGACTGGGTATTCTGATCTTATTCAGGCGC  
CTGCACCCGTAATAATGTTACGACTAATACGGCAGGGCAAAAACCAACTGATCCC

>*Nilaparvata\_lugens*  
GATCCTTTCAGTTCAATGAAAGATGATGAATAAGGTAAACATCCATGTGGGTGAAACCTG  
AATCTTTCCTTGTTACGCTTATTCAGGTCAAACCTCTCTGATTTT

>*Aphis\_gossypii*  
GATTCTTCCAGATTCATATGGGATATGATGAACGGGTCTTATCTCTTCTTATGGAGAATC  
CTGTGCCTTCAAACCTTGTTACGTATTTATCAGGTTAAACCCATCTGATCCT

>*Diuraphis\_noxia*  
GATTCTTCCAGATTCATATGGGACATGATGAATGGGTCTAAACTCTCTCAAAGAGAAGC  
CTGAGCCTTCAAACCTTGTTACGTATTTAACAGGTCAAACCTATCTGATCCT

>*Myzus\_persicae*  
GATTCTTCCAGATTCATATGGGAAATGATGAACGGGTCTAATCTCTTCTCAAAGAGAAGC  
CTGTGCCCTCAAACCTTGTTACGTATTAACAGGTCAAACCTTCTGATCCC



>*acyrthosiphon\_pisum*  
GATTCTTCCAGATTCATATGGGACATGATGAACGGGTGTAAACTCTTCTCAAAGAGAAGC  
CTGTACCTTCAACCTTGTTACGTATTAACAGGTCAAACCCATCTGATCCC

>*Bemisia\_tabaci*  
GATTCTTCTGAGTTCATTGGGAAATGATGATCGGTCAATTTATGACTCCTACTGATGACGC  
CTGAAGCCATTTGTTACGACTTGGTCAGGTGAAACCCATCTGATCCC

>*Sipha\_flava*  
GATTCTTCCAGATTCATATGGGACATGATGAACGGGTTTAAACTTCATTTCGTGAAGAATC  
CTGTGCCTTTAAACTTGTTACGATTTTCATCAGGTCAAACCTATCTGATCCC

>*Gerris\_buenoi*  
ATGTAGATATTTGTTTGTATGGGGATATGATGATTGGTTGTAACCGGTGTTCTGCGCGAA  
GCCTGGACCTCTTTATTAACCTTGTTACGATTAACCCAGGTAAATACCATCTGATCCT

>*Laodelphax\_striatellus*  
GATCCTTTTCAAGTTCATGAAAGATGATGAATAAGGTAATCATCCTTCATGGGTGAAGCCT  
GAGTCTTTACTTGTACGCATATTCAGGTCAAACCTCTCTGATTTT

>*Ixodes\_scapularis*  
GATTCTTCCGAGATTCATGAGTGGGAGTGTGAGTCGTGGGTGTTTCATGCCAATGCGTGATA  
CGTGCGACGCCCTGATTGTTACGACGATTGCACGTGACCCCTCTGACCCC

>*Varroa\_destructor*  
GATCCTTCTGACCAGTTCAGAAGCATGATGAGTCGGGAGTCATACCTTCCATGGTGACAC  
GTGTGACGCTATAACCTTGTTACGCATTCGCACGGGACCCGCCTGATTCT

>*Varroa\_jacobsoni*  
GATCCTTCTGACCAGTTCAGAAGCATGATGAGTCGGGAGTCATACCTTCCATGGTGACAC  
GTGTGACGCTATAACCTTGTTACGCATTCGCACGGGACCCGCCTGATTCT

>*Dermacentor\_silvarum*  
GATCCTTTAACGGTTCCTACTGGGGAGTGTGAGTTGTGGGTTTCGCACGCCTCATGCGTGA  
TACGTGCCACGCCCTTTAACCTTGTTACGACGACAGGCACGTAGCCCTTCTGACCCC

>*Galendromus\_occidentalis*  
GATCCTTCTGACTAGATTCAGAAGCATGATGAGTCGGGATTCTGACACCCAGTGGTGAC  
ACGTGTGACGCCAATCCTTGTTACGCAAACGCACGCGACCCGCCTGATTCTCG

>*Rhipicephalus\_sanguineus*  
GATCCTTTTTGGTTCCTACTGGGGAATGATGAGCTGTGGGTTTCGCACGCCTCATGCGTGAT  
ACGTGCCACGCCCTTTTACCTTGTTACGACGATTGGCACGTAGCCCTTCTGACCCC

>*Rhipicephalus\_microplus*  
GATCTGTTGCGGTTCTACTGGGGAATGATGAGTTGTGGGTCTGCATGCCTCGTGCGTGAT  
ACGTGCCGCGTCTTTTACCTTGTTGCGACGATTGGCACGTAGCCCTTCTGACCCC

>*Stegodyphus\_mimosarum*  
GATCCTTTTACAGATCAATGGGATGTGATGAGTCGGGTCTCATGCAATTGCATGACACGT  
GCGACGCTGATCTTGTTACGCACAGTGCACGAGAAAAATCTGATCCC

>*Stegodyphus\_dumicola*  
GATCCTTTTACAGATCAATGGGATaTGATGAGTCGGaTCTCATGCAAgTGCATGACACGT  
GCGACGCTtGATgTTGTTACGCACAGTGCACGAGAAAAgTCTGATCCC

>*Loxosceles\_reclusa*  
GATCCTTTCTGGTTCAAAGGGAAGTGTGAGTCGGTCTTACGTTGATATACGTGAAACGG  
GTACCGCTGTTTGTACGACGTTTGGCCGTAAGCCGTCTGATCCC

>*Zootermopsis\_nevadensis*  
GATCCTTCTAAGGTAATGGGAGATGATGATTTGGAAAACACATAATTATATGTGAAG  
CCTGAAGTGTATTGTTACGAACACTCAGGTAAATTCATCTGATCCC

>*Blattella\_germanica*  
GATCCTCAAGGTTCAAATGGGAAATGATGAATTGGATATCACGCTTGTGTGTGAAGCCTG  
TAACATCTTGTTACGCAAACCTCAGGCTGGAAATATCTGATCCC

>*Centruroides\_sculpturatus*  
GATCCTTTTGCATTTTACAAGTAATGGGAAATGATGAGTTGGGGTTCACGATTCTTCGT  
GACACGTGCGCCACCTTCTGTTACGCATTGCACGTGACCTTCTGATCCC

>*Ostrinia\_furnacalis*  
GATCTTTCAAAGGTTAAATGGGGGATGATGATCGGATTGGACACGCGACTGCGTGACGT  
CCGCCCGGACTGTTACGCTTGGGCGGGCCAAAATCCTACTGACTCC

>*Vanessa\_tameamea*  
GATCTTTCTAAAGGTTACAACGGGGAATGATGATCGGGCTAATCATGCGTCTGCGTGAAG  
TCCGCCACCGATTGTTACGCATTACGGCGGGCCAAAATCCTTCTGACCCC

>Trichoplusia\_ni  
GATCTTTCCAAAGGTTAAACGGGGGATGATGATCGGATTGGACTTGCCTGTCATGATGT  
CCACCACCGAATGTTACGCTTTGGTGGGCTAAAATCCTTCTGACTCC

>Pieris\_rapae  
TATCCTTTCCAGGACCAAACGGGGGATGATGATCGGTTTATTACGCGTCTGCGTGACG  
TCCGTCACCGATTGTTACGCTTAGACGGGCTAAAACCTTCTGACCCC

>Papilio\_machaon  
GATCTTTCCAAAGGTTTAAACGGGGAATGATGAATTTCGGTTAATCACGCGGCTGCGTGAAG  
TCCGTCACCGAATGTTACGCATTTGGCGGGCTAAAACCTTACTGACCCC

>Plutella\_xylostella  
GATCTTTCCAAAGGTATACGGGGGATGATGATCGGATTGGACATGCGCCTGCATGAAGTC  
CGCAGCCGATTGTTACGCTTAGCGGGCTAAAATCCTTCTGACCCC

>Zerene\_cesonia  
GTATCCTTTCCAGGACCAAACGGGGGATGATGATCGGTTGAATCACGTGTCTACGTGATG  
TCCGTCACCGAATGTTACGCATTAGACGGGCTAAAACCTTCTGACCCC

>Galleria\_mellonella  
GATCTTTCTAAAGGTTTTAAATGGAGTATGATGATCGGTTTTTTTACACGTCTGTGTGAT  
GTCTGCCACCGAAATGTTACGCTTTGGCGGGCTAAAATCCTTCTGACTCC

>Danaus\_plexippus  
GATCTTTCTAAAGGTTTTAAACGGGGAATGATGATCGGGTTAATCACACGTCTGTGTGATG  
TCCGCTGACCATTGTTACGCAATGGCGGGCTAAAATCCTTCTGACCCC

>Amyelois\_transitella  
GATCTTTCCAAAGGTTAAACGGGGAATGATGATCGGAATTTTTACGCGACTGCGTGAAGT  
CCGCAGCCGATTGTTACGCTTGTGCGGGCGAAAATCTTTCTGACCCC

>Hyposmocoma\_kahamanoa  
GATCTTTCTAAAGGTTAAACGGGGGATGATGATCGGATGGACACGCGTCTGCGTGATGT  
CCGCCACCGAATGTTACGCATTAGGCGGGCCAAAATCCTTCTGACCCC

>Spodoptera\_litura  
GATCTTTCCAAAGGTTAAACGGGGAATGATGATCGGATTGGACATGCGTCTGCATGATGTC  
CGTTGCCGATTGTTACGCTTTGACGGGCTAAAATCCTACTGACCCC

>Pararge\_aegeria  
GATCTTTCTGTAAGTTTTTAAACGGGGGATGATGATTTCGGATTGAACACGCGTCTGCGTG  
AGGTCGCCCGCCGATTGTTACGCATTTCGAGCGGGCTAAAATCCTTCTGACCCC

>Bicyclus\_anyna  
GATCTTTCCAAAGGTTAAACGGGGGATGATGATCCGGGTTTACACGCGTCTGCGTGATG  
TCCGCCACCGTACTGTTACGCTTTACGGCGGGCTAAAATCCATCTGACCCC

>Bombyx\_mori  
GATCTTTCTAAAGGTTTTAAACGGGATATGATGATCGGATTATTCATGCGACTGCATGATGT  
TCGTCGCCGAATGTTACGCATAAGGCGGGCTAAAATCCTTCTGATCCC

>Bombyx\_mandarina  
GATCTTTCTAAAGGTTTTAAACGGGATATGATGATCGGATTATTCATGCGTCTGCATGATGT  
TCGTCGCCGAATGTTACGCATAAGGCGGGCTAAAATCCTTCTGATCCC

>Manduca sexta  
GATCTTTCTAAAGGTTTAAACGGGGGATGATGATCCGATTAATCACGCGTCTGCGTGAAGTC  
CGCCATCGATTGTTACGCATTTGGCGGGCTAAAATCAGACTGACCCC

>Heliconius\_melpomene  
GATCTTTCTGTAAGTTTTTACGGGGAATGATGATCGGGATGATCACGCGTCTGCGTGAGG  
TCCGCCACCGAATGTTACGCAATACGGCGGGCTCAAATCCTTCTGACCCC

>Melitaea\_cinxia  
GATCTTTCTAAAGGTTAAACGGGGAATGATGATCGGGTTTCATCACGCGTCTGCGTGATGT  
CCGCCACCGATTGTTACGCATTTCAGGCGGGCTAAAATCCTTCTGACCCC

>Heliothis\_virescens  
GATCTTTCCAAAGGTTAAACGGGGAATGATGATCGGATTGGACTTGCATTGCATGATGTC  
CGTCGCCGAATGTTACGCTTATGGCGGGCTAAAATCCTTCTGACCCC

>Anoplophora\_glabripennis  
GATCCTTCTGATTGTTTCAGATGAGAAGTGATGTTTTGGGGTTTTTTCAGAAGATTATTTCTG  
AAGTCTGCTCCCCAGTTTTTTTTGTTACGACTTGGAGCAGACGATACTTCTGATCTC

>Leptinotarsa\_decehlineata  
(GATCCTTCTGATTGTTTCAGATGAGAAGTGATGATTGGGGTTTTTCTGGTTAAATACCTGAA  
GCCTGTTCCCAATTCTTGTACGAATTTTGTACGGCAATACTTTTCTGATCTC

>Diabrotica\_virgifera

GATCCTTCTGATAGTTTCAGATGAGAGATGATGAATGGGTTTTTCAGAAACAAAATTTCTG  
AAGTCTGTAACCTCCACTTGTACGATTTGGCAGACGATACCTACCTGATCTC  
>*Tribolium\_castaneum*  
GATCCTTCTGATGTTTCAGATGGGAGATGATGAATGGGTCGTTTCAGAAAGTCCATTTCTGAG  
GCCTGTAGCCCTTTTTGTTACGACTTTAAGCAGGCAATACTTTTTCTGATCCC  
>*Aethina\_tumida*  
GATCCTTCTGATTGTTTCAGATGGGAGATGATGAACGGGTTCTTGCAGGGACGTCCCTGAA  
GCCTGTTCCCAAACCTTGTACGATTTTGGCAGGCCACTACCCATCTGATCCC  
>*Sitophilus\_oryzae*  
GATCCTTCTGATCGTTTCAGATGGGAGATGATGATTGGGATTTAACAGAATTTTTTCTGAA  
GCCTGTACCCATATTGTTACGACTATGGCAGGCAATCCTCATCTGATCCC  
>*Dendroctonus\_ponderosae*  
GATCCTTTTACAATGGTGAAATTTGGAAATGATGAACGGGGACGATCAGATTTTTTGTCTGA  
AGTCTGCACCTATTTGTTACGACTTTTGGCAGACCATCCCTATCTGATCC  
>*Anoplophora\_glabripennis*  
GATCCTTCTGATTGTTTCAGATGAGAAGTGATGTTTGGGGTTTTTCAGAAGATTATTTCTG  
AAGTCTGCTCCCCAGTTTTTTTTGTTACGACTTGGAGCAGACGATACTCTTCTGATCTC  
>*Tigriopus\_californicus*  
GATCCTTCTGAACACAGTTCAAACAGGAATTGATGAATTGGGTTGCATCTTCATAGATGA  
GGCTTGAGCCAATACTTGTACGCTCATCAAGCTATACTATCTGATCCT  
>*Catajapyx\_aquilonaris*  
GATCCTTCTAAAGTTCAAATGGGAAGTGATGAGCTGGTTTTCTTACCACCATGGTGAGGC  
CTGCACCACAAAATATACGACACTTGCAGGATAAACCTATCTGATCCC  
>*Cyphomyrmex\_costatus*  
GATCCTTCAATCAGGTATCAAAATGGGAGATGATGAATGGGTTCACTCAAATTTGTTTGA  
GACGCCTGCACCCTACTTGTACGACGAAAGCAGGTTAAACCCCTCTGATCCC  
>*Dinoponera\_quadriceps*  
GATCCTTCTTAAGTTTGAATGGGAAATGATGAATGGGTTTTGCTCAAATTTGTTTGAAGC  
CCTGAACCTTACTTTGATACGACATTCGGCAGGCTAAACCTCTCTGATCCC  
>*Nylanderia\_fulva*  
GATCCTTCAATCAGGTATCAAAATGGGATGTGATGAATGGGTTCAACTCGAAATTATTTCGA  
GACGCCTGCGTCCCCTATGTTACGACACTAGCAGGTTAAACCTCTCTGATCCC  
>*Odontomachus\_brunneus*  
GATCCTTCTTGAGTTTGAATGGGAAATGATGAATAGGTTTTGGCTCAAATTTATTGAGATG  
CCTGCATCTTACTTTGTTACGACTTCCAGCAGGCTAAACCTCTCTGATCCC  
>*Pseudomyrmex\_gracilis*  
TATCCTTTCGCGTTTTTAAATTTGGGAGATAATGAATGGGTTTTATTTCAAATTTTATTGGA  
GACACCTGCACCCTGTATTGTTACGACATTTGCAGGTAAAACCTGTCTGATCC  
>*Trachymyrmex\_cornetzi*  
GATCCTTCAATCAGGTATCAAAATGGGATGTGATGAATGGGTTTACTCAAATTTGTTTGA  
GACGCCTGCACCCTATTTGTTACGACGCAAGCAGGTTAAACCTCTCTGATCCC  
>*Temnothorax\_curvispinosus*  
GATCCTTCAATCAGGTATCAAAATGGGAGGTGATGAACGGGTTTACTCAAATTTATTGGA  
GACGCCTGCAACCCTAGTTGTTACGACGCTAGCAGGTTAAACCCCTCTGATCCC  
>*Trachymyrmex\_septentrionalis*  
GATCCTTCAATCAGGTATCAAAATGGGACGTGATGAATGGGTTCACTCAAATTTATTGGA  
GACGCCTGCACCCTCTTGTACGACGCAAGCAGGTTAAACCCCTCTGATCCC  
>*Trachymyrmex\_zeteki*  
GATCCTTCAATCAGGTATCAAAATGGGATATGATGAATGGGTTTACTCAAATTTGTTTGA  
GACGCCTGCACCCTACTTGTGTTACGACCCAAGCAGGTTAAACCTCTCTGATCCC  
>*Vollenhovia\_emeryi*  
GATCCTTCAATCAGGTATCAAAATGGGAAGTGATGACTGGGTTTAAAGCTCAAGATTATTT  
GAGACTCCTGCGACCCGTAATTGTTACGACTATGCAGGCTAAACCTCTCTGATCCC  
>*Linepithema\_humile*  
GATCCTTTCGAGGTATCAAATGGGAGATGATGAACGGGTTTTAACTCGAATTTTTCGAGACG  
CCTGCCACCCTGTTGTTACGACGACAGCAGGTTAAACTCCTCTGATCCC  
>*Ooceraea\_biroi*  
GATCCTTCAATGTCAGGAATCAAACCTGGGATATGATGAATAGGTTTTACCTCAAATTTGTT  
GAGACGCCTGTAACCTTTTTTAAAGTTACGACATCGGCAGGCTAAACCGCTCTGATCCC  
>*Camponotus\_floridanus*  
GATCCTTCAATCAGTTTTCAAATGGGAAATGATGAATGGGTTTTACTCAAATTTATTGAG

ACGCCTGCATCCCTTACTTTGTTACGACACTAGCAGGCAAACCTCTCTGATCCC  
>Harpegnathos\_saltator  
GATCCTTCTTCAGTTTCAATGGGAAATGATGAATAGGTTGGCTCAAGTTATTTGAGACGC  
CTGCACCTTACTTTGTTACGACTTTTCTGCAGGTTAAACCTCTCTGATCCC  
>Wasmannia\_auropunctata  
GATCCTTCGATCAGGTATCAAAATGGGAGGTGATGAACGGGTTTTGACTCAAAATTTGTTT  
GAGACGCCTGCACCCTAGTTGTTACGACGTTAGCAGGTTAAACCCCTCTGATCCC  
>Acromyrmex\_echinatior  
GATCCTTCTCTTAGGTATCAAAATGGGATGTGATGAATGGGTTTACTCAAATTTGTTTGA  
GACGCCTGCATCCTACTTGTGTTACGACTCAAGCAGGTAAACCTCTCTGATCCC  
>Monomorium\_pharaonis  
GATCCTTCTCGAGGTATCAAAATGGGAGATGATGAATGGGTTTTGACTCAAAGTTATTTGA  
GATGCCTGCACCCTGATTGTTACGACACAAGCAGGCTAAACTCTCTGATCCC  
>Solenopsis\_invicta  
GATCCTTCTCGAGGTATCAAAGGGAGATGATGAATGGGTTTATCTCAAATTTATTTGAG  
ACGCCTGCACCCTGACTGTTACGACGAGAGCAGGCTAAACCCCTCTGATCCC  
>Pogonomyrmex\_barbatus  
GATCCTTCAATCAGGTATCAAGATGGGAGATGATGAACGGGTTTTGACTCAATATTATTTG  
AGACGCCTGCACCCTGTTTGTGTTACGACGCAAGCAGGCTAAACCCATCTGATCCC  
>Pogonomyrmex\_barbatus  
GATCCTTCAATCAGGTATCAAGATGGGAGATGATGAACGGGTTTTGACTCAATATTATTTG  
AGACGCCTGCACCCTGTTTGTGTTACGACGCAAGCAGGCTAAACCCATCTGATCCC  
>Cardiocondyla\_obscurior  
GATCCTTCTTTAAGGTGAAAATGGGATATGATGAACGGGTTTAGCTCGAATTTGTTTGA  
ACGCCTGCAGCCTTTATTGTTACGACGATTGCAGGTTAAACCTCTCTGATCCC  
>Bombus\_terrestris  
GATCCTTCTTTAAGGAAAATGGGAAATGATGATTAGGTTATCTCATTTTTCATATGAGA  
AGCCTGCATTCTTACATACTTGTGTTACGCTTTATGCAGGTCAAACCTCTCTGATCCC  
>Bombus\_impatiens  
GATTCTTCTTTAAGGAAAATGGGAAATGATGATTAGGTTATTCTCGTTTTCCATATGAGA  
AGCCTGCATTCTTTACATACTTGTGTTACGCTTTATGCAGGTAAACCTCTCTGATCCC  
>Cephus\_cinctus  
GATCCTTCTGTGATTACAGAACGGGGTGTGATGATATGGTTTTGCTCGTTCTGTTACGAGA  
CGCCTGCGGCCACAATCCTTGTGTTACGATTATAAGGCAGGCTAAACCGCTCTGATCCC  
>Trichogramma\_pretiosum  
GATCCTTCTGGATTACAGAACGGGAGATGATGACTGAGTAAGTCGCTCGTTACCCATACGA  
GATGTCTGTTGCTCGGAACCTTGTGTTACGCAATCGGCAGACTATGACACTCTGATCCC  
>Fopius\_arisanus  
GATCCTTCTGTGATTACAGAACGGGAGATGATGACTCGTTTTGGCTCGCAATTGCGAGATG  
CCTGTTACGGCAATCCTTGTGTTACGATTATAAGGCAGGCAAACCTCTCTGATTCC  
>Chelonus\_insularis  
GATCCTTCTCGGATTCAAACGAGAGATGATGATTGTTAGGACTCGTTACATACGAGAAG  
CCTGCACGGAACTTGTGTTACGATTACGAGGCTAAACGGCTCTGATCTC  
>Neodiprion\_lecontei  
GATCCTTCTGAGATTACAGAACGGGAAATGATGACGCGGTCGACCCTGTTTCATACGGGAC  
GCCTGCACCGCAAACCTTGTGTTACGATAACGCAGGTCAAACCTCTCTGATCCC  
>Orussus\_abietinus  
GATCCTTCTGTGATTACAGAACGGGGTGTGATGACTGGGTTGTTCTCGTTTTTCATACGAGA  
CGCCTGCACCGGATTCTTGTGTTACGATTCTAGCAGGTCAAACCTCTCTGATCCC  
>Diachasma\_alloeuum  
GATCCTTCTGTGATTACAGAACGGGAGATGATGACTCGTTTTGGCTCGCATTTGCGAGATG  
CCTGCTACGGCAAACCTTGTGTTACGATCAAGCAGGCGAAACCTCTCTGATTCC  
>Belonocnema\_treatae  
GATCCTTCTGTGATTACAGATGGGAGATGATGATTTGGTTTTAGCTCGTTTCGATACGAGAAG  
CCTGCGCAACCAAACCTTGTGTTACGACAGTGCAGGCAAACCGCTCTGATCCC  
>Vespa\_mandarinia  
GATCCTTCTGTTGATCAGAATGGGAAATGATGATCTGGTTTTCTCTCGTTACGAGATG  
CCTGCACCATATTTGTTACGACTTTTGGCAGGTTGAACCTCTCTGATCCC  
>Eufriesea\_mexicana  
GATCTTTCTAAAGTCAATGGGAAATGATGAAGAGGTTATTCTCATTCTTATATGAGAAGC  
CTGCACAAATCTTATACTTGTGTTACAATTTAAAGCAGGTTAAACCTTTCTGATCCC

>Megalopta\_genalis  
GATTCTTCCCAATCAAAGGGATATGATGACTGGGTGAATCTCGTGCTGATACGATACGC  
CTGCACCGTTTCATTTCTTGTTACGTTTAAAGCAGGTTAAACCCATCTGATCCC

>Nomia\_melanderi  
GTATCCTTCTTAGGTGTAAAAGGGATATGATGATTGGGATCTTCTCGTTTTTATACGAGA  
TGCCTGCACTTTATACTTGTTACGATTAAAGCAGGTTAAACCTCTCTGATCCC

>Apis\_mellifera  
CATCCTTTTCGCATTCAATGGGAGATGATGAATATCGTGTTCTCATTCTCGATATGAGAG  
GCCTGAAGTTTTTTTTTTGTTACGCACCTTTGTCAGGTTATACTATTCTGATCCC

>Apis\_florea  
CATCCTTCTAGCAGTCAAATGGGATATGATGAATGACGTGTTCTCATTCTAGATATGAGA  
GGCCTGAAGTTTTTTTTTTGTTACGACATTTATTACAGGTTATAACCATTCTGATCCC

>Apis\_dorsata  
CATCCTTCCCTGCGATCAATGGGAGATGATGAATGTCGTATTCTCATTCTCGATATGAGAG  
GCCTGAGTTTTTTTTTTCTTGTTACGTAGTTTGTGTCAGGTTATAACCATTCTGATCCC

>Apis\_cerana  
CATCCTTCCGATGTTTTAATGGGAGATGATGAATGTCGTGTTCTCATTCTCGATATGAGAG  
GCCTGAAATTTTTTTTTTTGTTACGCAATTTGTCAGGTTAAACCTCTGATCCC

>Dufourea\_novaeangliae  
GATCTTTCCAGTTCAAATGGGATGTGATGATTGGGTAATTCTCGTTTTTATATGAGACGC  
CTGCATGCTCTTAATTTTGTACGCTTAAGCAGGTTAAACCTTCTGATCCC

>Ceratina\_calcarata  
GATTCTTCCCTGAATTTCAAATGGGAAGTGATGATAAGGTTTTTCTCGTCCGAATACGAGA  
AGCCTGCGGATTTTTATCCTTGTTACGTTCAACGCAGGTTAAACCTCTCTGATCCC

>Melipona\_quadrifasciata  
GATTCTTCTGTAAGGAAATGTGGGAAATGATGATCTAGGTTATGCTCATCTTTAATATGA  
GAAGCCTGCATTTGTTATACTTGTTACATTTTATGCAGGTTAAACCTCTCTGATCCC

>Habropoda\_laboriosa  
GTTTCATATATTTCTTACATGGGAGGTGATGATTAGGTTACTCTCATCCAGATATGAGAAG  
CCTGCTTTTCTAAATTTCTTGTTACGCTTTAAAGCAGGTTAAACCTTTCTGATCCC

>Copidosoma\_floridanum  
GATCCTTCTGGGATTGAGAACGGGAAATGATGACCGAGGTGAATCTCGTTTTGATACGAG  
ACGTCTGTGCACTCGAACTTGTTACGCATATGGCAGACTATGACCCTCTGATCCC

>Microplitis\_demolitor  
GATCCTTCTGTGATTGAGAACAAGAAATGATGACTCGTGAGAGCTCGTCTGATACGAGAT  
GCCTGCAACGGACATCCTTGTTACGATTTAGCAGGCCAAACATTTCTGATCTT

>Nasonia\_vitripennis  
GATCCTTCTGTGATTGAGAACGGGATATGATGACTGAGTCTAGCTCGTTCTATACGAGAT  
GTCTGCGCGCTCGCAAACCTTGTTACGCTTACGGCAGACCATGACCCTCTGATCCC

>Polistes\_canadensis  
GATCCTTCTGTTGATCAGAATGGGACGTGATGATTTGGTTTTGCTCGTTCGATACGAGATG  
CCTGCACCGACTCTTGTTACGACTTCCGGCAGGATAAACCTCTCTGATCCC

>Polistes\_dominula  
GATCCTTCAAAGGTCATATGGGAAATGATGATTTGGTTTTGCTCGTTGTTACGAGATGCC  
TGCACCGACATTTGTTACGACTATTGCAGGTTAAACCTCTCTGATCCC

>Athalia\_rosae  
GATCCTTCTGAGATTGAGAACGGGAGGTGATGACTCGGGGCGGCTTGTGATTGATACGAG  
ATGCCTACACCGCAAACCTTGTTACGATACTGTAGGTCAAACCCCTCTGATCCC

>Megachile\_rotundata  
GATCCTTCCGTTCAAAGGGATATGATGAATCGGTCTATCTTGTCTTTTACAAGAAGC  
CTGCACCGTGTACGACGTGGCAGGTTAAACCTCTCTGATCCC

- **Archeplastida - A few representative species are listed**

>Syntrichia\_caninervis  
GATCCTTCTGGTTTTACAACATGATGAATGGACAATTCTCGCGTCTGCGTGACAGGTGCC  
CGTTACATACTTGTTAAACAGGGCACCCCTCCATATCTGACCC

>Physcomitrella\_patens  
GATCCTTCTGGTTTTCAAATGATGAGAGGAGGAGTCCGCGTCTGCGGAGAGGTGCC

CGCCCCAATACCTTGTTACAAAGGGCAACCCCCCTGTCTGACCC  
>Marchantia\_polymorpha  
GATTCTTCTGGTTTTTAAATATGATGAATGGCTTATTCTCGCGCTTGCAGAGAGAGGTGTC  
CGCAGCACCTTGTTACGCATGGACACCGCTGTTCTGATCCTT  
>Amborella\_trichopoda  
GATCCTTCAGGCAGAACGGGAAGATGAGGAGTGGTATTTTCTCACTTGTGAGATGAGTGT  
CTGCCCCATGCCTGGTTACGACAAATGGGCACTCACATTCTAATCCTATCTGATTCC  
>Nymphaea\_colorata  
GATCCTTCAGGCAGCAAGGGAAGGTGATGAGTGGGTCTAATCTCGCTGATAACATGCGGG  
ATGGGTGTTGCCCCAACGCCTGGTTACGACGCTCGGGCACCCCAATCTTAACCATCTG  
ATTCC  
>Selaginella\_moellendorffii  
GATCCTTCTTGGTTTTACTGGGGGATGATGAGTGGTAAATGCTCGGTTTCTCCACTGTGA  
GAGGGCTTGCCCGCCCAAATCATTGTTACGCAAGGGGAGTCTCCTATTTTGGCCTCT  
GACCT  
>Chara\_braunii  
GATCCTTCTTGGTTTTATGAAATGATGATGAGTGGTACTCACCTCCCTTTTGCATGTGA  
GAGGTGGCCCTCACCCAGACTTGTTACGACCGGTGCGCCGCTAAGCCTATCTGACCCCT  
>Arabidopsis\_thaliana  
GATCCTTCAGGCAAGTTAAAGGGGATATGATGAATGGTAAAACTCGCTTATATTGCGAG  
AAGAGCGTTCCGCCCAAAGCCTGTTACGACTATTGGGCGCTCTCTTTTTTACACAATCTG  
ATCCCT  
>Oryza\_Sativa\_Japonica\_Group  
GATCCTTCAGGCAGTTAAAGGGAGATGATGAGTGGTAAACATCTCGCTAATTAATGTTGCG  
AGAGGGGTGTCTGCCCAAACCAAGCCTGTTACGACAACAGGGCACTCCAATATTTTACCA  
TCTGATCCC  
>Theobroma\_cacao\_Matina\_1.6  
GATCCTTCAGGCAGTAAACGGGATATGATGAGTGGTCACTACTCACAAGCGCTGTGAGAT  
GGGTGTCCGCCCAAACGCCTGGTTACGACAACATGGGCACTCCCCTCTGTACCGCTGAT  
CCC  
>Arabidopsis\_halleri  
GATCCTTCAGGCAAGTTAAAGGGGAAATGATGAATGGTAAAGTACTCGCTTCTATTGCGAG  
AAGAGCGTTCCGCCCAAAGCCTGTTACGACAATTGGGCGCTCTCATTTTTTACACCGTCTG  
ATCCC  
>Beta\_vulgaris  
GATCCTTCAGGCAGTAAATGGAATATGAGGAGTGGTCAATTTCTCGCTTATATAAATTGCG  
AGAGGGGTGTCCGCCCAAAGCCTGGTTACGACAATTGGGCATCCCCATTCTTAACCATCT  
GATTCTT  
>Brassica\_oleracea  
GATCCTTCAGGTTTTAAAGGGGAAGTGAAGATTGGGTTTTAATCTCGCATATTTTATTGCGT  
GAAGAGCGTTCGCTCAAACCTTTTTACGACAATTGGGCGCTCCAATTTTCTTATCATCT  
GATCCC  
>Arabidopsis\_lyrata  
GATCCTTCAGGCAAGTTAAAGGGGAAATGATGAATGGTAAATACTCGCTTCTATTGCGAG  
AAGAGCGTTCGCCCCAAGCCTGTTACGACAATTGGGCGCTCTCATTTTTTTACACAATCT  
GATCCC  
>Brassica\_napus  
GATCCTTCAGGTTTTAAAGGGGAAGTGAAGATTGGGTTTTAATCACGCATATTTAATTGTGT  
GAAGAGCGTTCGCTCAAACCTTTTTACGACAATTGGGCGCTCCAATTTTCAATATATCTGATCC  
GATCCC  
>Brassica\_rapa  
GATCCTTCAGGTTTTAAAGGGGAAGTGAAGATTGGGTTATTCTCGCATATATGCGTGAAGA  
GCGTTCGCTCAAACCTTTTTACGACAATTGGGCGCTCCAATTTTCAATATATCTGATCC  
C  
>Actinidia\_chinensis  
GATCCTTCAGGCAGTTTTAAAGGGGATGTGATGAGTGGTCAACTCGCAATAAAAAATGC  
GAGATGGGTGCTACGGCACAAAGCCTGGTTACGACAATGCGGGCACTCTCATCTGAACC  
AATCTGATCCC  
>Corchorus\_capsularis  
GATCCTTCAGGCAGTAAACGGGATATGATGAGTGGTCACTACTCGCACGGATGCGAGAT  
GGGTGTCCGCCACGCCTGGTTACGACAACCTGGGCACTCCCATTTTTTACCATCTGATCCC

>*Vigna\_radiata*  
GATCCTTCAGGCAGTTAACGGGATGTGATGAGTGGTAAATGCTTGCATATAACATGCAAG  
AGGGGTGTCCGCCCCAGCCTGGTTACGACTATGGGGCACTCTCTTTTTTGACCTATCTGAT  
CCC

>*Vigna\_angularis*  
GATCCTTCAGGCAGTTAATGGGATATGATGAGTGGTAAATGCTTGCCTTAATATGCAAG  
AGGGGTGTCCGCCCCAGCCTGGTTACGACTATGAGGCACTCTCTTTTTTGACCTATCTGAT  
CCC

>*Cynara\_cardunculus*  
GATCCTTCAGGCAAGTTTTAATGGGAAGTGATGAGTGGTTCGCTACTCGCATTTAATATGC  
GAGAAGGGGTGTTTCGCCTAAAGCCTTACGACAATTGGCCACCTCCAATTTTTAACCATCT  
GATCCCT

>*Glycine\_max*  
GATCCTTCAGGCAGTTAACGGGATATGAGGAGTGGTAAATCTCGCACAAAATATGCGAG  
TGGGGTGTCCACCCAGCCTGGTTACGACACTAGGACACTCTCTTTTTTAACCAATCTGAT  
CCC

>*Daucus\_carota*  
GATCCTTCAGGCAGATAATGGGATGTGATGAGCGGTGAGAATATTGCAATAAAAAATGCA  
ATATGGGTGTCTAGCCCAAGCCTGTTACGACAACATAGGCGCTCTCGTTTTTAACCAATC  
TGATCCC

>*Cucumis\_sativus*  
GATCCTTCAGGCAGTAACGGGATATGATGAGTGGTTGGCTCTCGCTAATAATAATGCGAGT  
TGGGTGTCCGCCCCAAGCCTGGTTACGACAATTGGGCACTCCCATCTCTTCCAATCTGA  
TCCC

>*Medicago\_truncatula*  
GATCCTTCAGGCAGAAACGGGATATGATGAGTGGTTGAGTCTCGCACATAATATGCGAGT  
TGGGTGTTTCGCCCCAAGCCTGGTTACGACAATTGGGCACTCTCATTTAATCAATCTGATC  
CC

>*Phaseolus\_vulgaris*  
GATCCTTCAGGTTTATTGGATGTGATGAGTGGTAAAGACTTGCATACAATATGCAAGAGG  
GGTGTCCGCCCCAGCCTTGTACGACTGGGGGCACTCAATCTTTAGACCAATCTGATCCT

>*Lupinus\_angustifolius*  
GATCCTTCAGGCAGTTAACGGGATATGATGAGTGGTTAAATGTGCAATAAAAAATGCGA  
GTTGGGTGTTTCGCCCCAAGCCTGGTTACGACAATTGGGCACTCCCATCTTATTATTCCAATCTG  
ATCCC

>*Prunus\_persica*  
GATCCTTCAGGCAGAAACGGGATGTGATGAGTGGTCAGTATTCGCAATAATTATGCGAGA  
GATGGGTGTCCGCCCCAAGCCTGGTTACGACAATTGGGCACTCCCATTAATCTTTGTACCATC  
TGATCCC

>*Helianthus\_annuus*  
GATCCTTCAGGCAAGTTTTGAAGGGAGATGAGGAGTGGTCAATGCTTGCATTTAAATATG  
CAAGATGGGGTGTCCGCCCCAAGCCTGTTACGACAATTGGGCACTCCATTTTTAAACCA  
TCTGATCCC

>*Manihot\_esculenta*  
GATCCTTCATGGCAGTTAACGGGATGTGATGAGTGGTCATTTTTTCGCGATTAGCTTTGCG  
AGATGGGTGTCCGCCCCAATGCCAGTTACGACAATACGGGCACTCCCATTAATACCAATC  
TGATCCC

>*Solanum\_tuberosum*  
GATCCTTCAAGCAAGTTTTAATGGGATATGATGAGTGGTCATTACTCGCAATAAAAAATAAA  
ATATGCGAGAAGAGCGTTCCAGCCCAGCCTGGTTACGACAATTTGGGCGCTCTCATTTTTT  
ACCAATCTGATCCC

>*Prunus\_dulcis*  
GATCCTTCAGGCAGAAACGGGATGTGATGAGTGGTCAGTATTCGCAATAATTATGCGAGA  
GATGGGTGTCCGCCCCAAGCCTGGTTACGACAATTGGGCACTCCCATTAATCTTTGTACCATC  
TGATCCC

>*Solanum\_lycopersicum*  
GATCCTTCAGGCAAGTTTTAATGGATGTGATGAGTGGTCATAACTCGCAATAAAAAATGCG  
AGAAGAGCGTTCCAGCCCAGCCTGGTTACGACAATTTGGGCGCTCTTAATTTTTACCAATC  
TGATCCT

>*Theobroma\_cacao\_Belizian\_Criollo\_B97-61\_B2*  
GATCCTTCAGGCAGTAAACGGGATATGATGAGTGGTCATTACTCACAAGCGCTGTGAGAT

```
GGGTGTCCGCCTCAACGCCTGGTTACGACAACATGGGCACTCCCCTCTGTACCCCTGAT
CCC
>Capsicum_annuum
GATCCTTCAGGCAAGTTTTAATGGGATATGATGAGTGGTCATTACTCGCAATTTAAAAAT
ATGCGAGATGGGCGTCCAGGCTCAGCCTCGTTACGACATTTTGGGCGCTCTCATTTTTAA
CCAATCTGATCCC
>Prunus_avium
GATCCTTCAGGCAAGAAACGGGATGTGATGAGTGGTCAGTATTCGCAATAATTATGCGAGA
GATGGGTGTCCGCCCAAAGCCTGGTTACGACAATTGGGCACCCTAATCTTTGTACCATC
TGATCCC
>Nicotiana_attenuata
GATCCTTCAGGCAAGTTTTAAAGGGGATATGATGAGTGGTCAATGCTCGCATTTTAAATATG
CGAGAAGGGCGTCCAGCTCAGCCTGTTACGACAATTTGGGCGCTCTCATTTTACCAATCT
GATCCC
>Gossypium_raimondii
GATCCTTCAGGCAAGAAACGGGATATGATGAGTGGTCATTACTCGCAAGCGTTGCGAGAT
GGGTGTCCGCCCAAAGCCTGGTTACGACACTTGGGCACTCCCATTTTTTACCATCTGATC
CC
>Olea_europaea_var._sylvestris
GATCCTTCAGGCAAGTTTTACGGGGATGTGATGAGTGGTCGACACTCGCACTGAACATGC
GAGATGGGTGTCCAGCCTAAGCCTGGTTACGACAATATGGGCACTCTCATTTTTACCAAT
CTGATCCC
>Malus_domestica
GATCCTTCAGGCAAGAAACGGGATGTGATGAGTGGTCATAATTCGCAAATTTAAATGCGAG
AGATGGGTGTCTGCCCAAAGCCTGTTACGACAATTGGGCACTCTCCTGTTTTTACCATCT
GATCCC
>Pistacia_vera
GATCCTTCAGGCGGTTTTAACGGGGATGTGATGAGTGGTCATCACTCGCTATAACTTTGCG
AGATGGGTGTCCGACCTATGCCTGGTTACGACAATCTGGGCACTCCCATCTTTACCAATC
TGATCCC
>Populus_trichocarpa
GATCCTTCAGGGTTTTAACGGGATATGATGAGTGGTCAATGCTCGCATATAAACATGCGAG
ATGGGTGTCCAGCCCACTCCCTGGTTACGACAACAGGGCACTCCCATCTTACCTATCTG
ATCCC
>Citrus_clementina
GATCCTTCAGGCAGTAACGGGGATGTGATGAGTGGTCATCGCTCGCTAAAAGTCTGCGAG
ATGGGTGTCCGCCCAAAGCCTGGTTACGACAATCTGGGCACTCCCATCTTTACCGATCT
GATCCC
>Coffea_canephora
GATCCTTCAGGCAGTTTTACGGGGATGTGATGAGCGGTCAAAGCTCGCATTTTAAACATGCG
AGATGGGTGCCCGGCCCAAAGCCTGGTTACGACAACCCGGGCGCTCCCATATTTACCGAT
CTGATCCC
>Ipomoea_triloba
GATCCTTCAGGCAAGTTTTAAGGGGATGTGATGAGTGGTTAATGCTCGCAGTTTGTGCGA
GAAGGGTGCCCGCCTTGCTGTTACGACATATTGGGCATTCCAATGTTTTTACCATCTGAT
TCC
>Vitis_vinifera
GATCCTTCAGGCAGTTAACGGGATATGATGAGTGGTCAACGTTTCGCAACAAATATGCGAG
ATGGGTGTCCGCCCTAGCCTGGTTACGACAATTGGGCACTCTCATCTTTTACCAATCTGAT
CCC
>Trifolium_pratense
GATCCTTCAGGCAGAAACGGGGATATGATGAGTGGTCTGAGTCTCGCAATAAAAAATGCGA
GTTGGGTGTTTCGCCCAAAGCCTGGTTACGACAATTGGGCACTCTCCTTTAATCAATCTGA
TCCC
>Brachypodium_distachyon
GATCCTTCAGGCAGCAAAGGGAAATGATGAGCGGTAACGGCTTGCAAATTTCACTGCGAG
AGGGTGCCCGCCCAACTAAGCCTGTTACGACAATGGGGCACCCCAATGATTTACCATCT
GATCCC
>Eragrostis_tef
GATCCTTCAGGCAGTCAAAGGGATATGATGAGTGGTAAAAGCTCGCAAATTTATCTGCGA
GAGGGGTGCTGCCCAAATAAGCCTGTTACGACAACAGAGCACTCACATGCTTACCA
```



TCTGATCCC

>*Triticum\_dicoccoides*

GATCCTTCAGGCAGTAAAGGGAGATGATGAGTGGTATCAGCTCGCTACAATGCGAGAGG  
GGTGTCCGCCCAACCAAGCCTGTTACGACAATGGGGCGCCCCAGTGACTTACCATCTGA  
TCCC

>*Oryza\_nivara*

GATCCTTCAGGCAGTAAAGGGAGATGATGAGTGGTAAACATCTCGCTAATTAATGTTGCG  
AGAGGGGTGTCTGCCCCAACCAAGCCTGTTACGACAACAGGGCGCTCCAATATTTTACCA  
TCTGATCCC

>*Oryza\_glumipatula*

GATCCTTCAGGCAGTAAAGGGAGATGATGAGTGGTAAACATCTCGCTAATTAATGTTGCG  
AGAGGGGTGTCTGCCCCAACCAAGCCTGTTACGACAACAGGGCACTCCGATATTTTACCA  
TCTGATCCC

>*Oryza\_glaberrima*

GATCCTTCAGGCAGTAAAGGGAGATGATGAGTGGTAAACATCTCGCTAATTAATGTTGCG  
AGAGGGGTGTCTGCCCCAACCAAGCCTGTTACGACAACAGGGCACTCCAATATTTTACCA  
TCTGATCCC

>*Oryza\_longistaminata*

GATCCTTCAGGCAGTAAAGGGAGATGATGAGTGGTAAACATCTCGCTAATTAATGTTGCG  
AGAGGGGTGTCTGCCCCAACCAAGCCTGTTACGACAACAGGGCACTCCAATATTTTACCA  
TCTGATCCC

>*Oryza\_barthii*

GATCCTTCAGGCAGTAAAGGGAGATGATGAGTGGTAAACATCTCGCTAATTAATGTTGCG  
AGAGGGGTGTCTGCCCCAACCAAGCCTGTTACGACAACAGGGCACTCCAATATTTTACCA  
TCTGATCCC

>*Oryza\_meridionalis*

GATCCTTCAGGCAGTAAAGGGAGATGATGAGTGGTAAACATCTCGCTAATTAATGTTGCG  
AGAGGGGTGTCTGCCCCAACCAAGCCTGTTACGACAACAGGGCACTCCAATATTTTACCA  
TCTGATCCC

>*Oryza\_brachyantha*

GATCCTTCAGGCAGTAAAGGGAGATGAGGAGTGGTAAATCTCGCTATTTTCCGCTGCG  
AGAGGGGTGCCCCGCCCAACCAAGCCTGTTACGACAATTGGGGCATCCCCGTGTCTACCA  
TCTGATCCC

>*Oryza\_punctata*

GATCCTTCAGGCAGTAAAGGGAGATGATGAGTGGTAAACATCTCGCTAGTTATGTTGCGA  
GAGGGGTGTCTGCCCCAACTAAGCCTGTTACGACAACAGGGCACTCCAGTCATTTACCAT  
CTGATCCC

>*Oryza\_sativa\_Indica\_Group*

GATCCTTCAGGCAGTAAAGGGAGATGATGAGTGGTAAACATCTCGCTAATTAATGTTGCG  
AGAGGGGTGTCTGCCCCAACCAAGCCTGTTACGACAACAGGGCACTCCAATATTTTACCA  
TCTGATCCC

>*Oryza\_rufipogon*

GATCCTTCAGGCAGTAAAGGGAGATGAGGAGTGGTAAACATCTCGCAACTTTTACTGCGA  
GAGGGGTGCCCCGCCCAACCAAGCCTGTTACGACAACAGGGGCATCCCCATCATTTTAC  
CATCTGATCCC

>*Ananas\_comosus*

GATCCTTCAGGCAGTAAACGGGATGTGATGAGCGGTAACAGCTCGCATTCTGCGAGAGGG  
GCACCCGCCCCATAAGCCTGTTACGACAAACAGGGGCGCTCTCGTAATTTACCAATCTG  
ATCCC

>*Saccharum\_spontaneum*

GATCCTTCAGGCAGTAAAGGGAAATGATGAGTGGTAAAGCTCGCGTTTTTTCAATTGC  
GAGAGGGGTGCTGCCCCAAATAAGCCTGTTACGACAACAGGGGCGCTCACACTGTTTACC  
ATCTGATCCC

>*Panicum\_hallii\_FIL2\_Phallii*

GATCCTTCAGGCAGTCAAAGGGAAATGAGGAGTGGTATAAGCTCGCAATTTATTATGCGA  
GAGGGGTGCTGCCCCAACTAAGCCTGTTACGACAACAGGGGCACCCCAATGAATTTACC  
ATCTGATCCC

>*Hordeum\_vulgare*

GATCCTTCAGGCAGCAAAGGGAGATGATGAGCGGTGTCAGCTCGCTATATGCGAGAGGGG  
TGTCCGCCCAACTAAGCCTGTTACGACAATGGGGCACCCCAATGACTTACCATCTGATC  
CC

```
>Sorghum_bicolor
GATCCTTCAGGCAGTTAAAGGGAAATGATGAGTGGTAGAAGCTCGCGTTTTTTTATTGCG
AGAGGGGTGCCTGCCCCAAATAAGCCTGTTACGACAACAGGGCACTCACACTGTTTACCA
TCTGATCCC
>Triticum_turgidum
GATCCTTCAGGCAGCAAAGGGAGATGATGAGTGGTATCAGCTCGCTACAATGCGAGAGG
GGTGTCCGCCCCAACCAAGCCTGTTACGACAATGGGGCGCCCCAGTGACTTACCATCTGA
TCCC
>Aegilops_tauschii
GATCCTTCAGGCAGCCAAAAGGGATGTGATGAGTGGTATCAGCTCGCTATAATGCGAGAG
GGGTGTCCGCCCCAACTAAGCCTGTTACGACAATGGGGCGCCCCAGTGACTTACCATCTG
ATCCC
>Triticum_urartu
GATCCTTCAGGCAGCAAAGGGATGTGATGAGTGGTATCAGCTCGCTATGTGCGAGAGGG
GTGTCCGCCCCAACTAAGCCTGTTACGACAATGGGGCACCCCAGTGACTTACCATCTGAT
CCC
>Panicum_hallii_HAL2
GATCCTTCAGGCAGTCAAAGGGAAATGAGGAGTGGTATAAGCTCGCAATTTATTATGCGA
GAGGGGTGCCTGCCCCAACTAAGCCTGTTACGACAACAGGGGCACCCCAATGAATTTACC
ATCTGATCCC
>Musa_acuminata
GATCCTTCAGGCAGTAAACGGGATGTGATGAGTGGTAAAAGCTCGCGCTGTTTGCGTGAA
GAGCAGCCGCCAGAGCCTGTTACGACAACAGGGCCTGCTCCCATCTTTACCCTTCTGAT
CCC
>Triticum_aestivum
GATCCTTCAGGCAGCAAAGGGATGTGATGAGTGGTATCAGCTCGCTATAATGCGAGAGG
GGTGTCCGCCCCAACTAAGCCTGTTACGACAATGGGGCGCCCCAGTGACTTACCATCTGA
TCCC
>Leersia_perrieri
GATCCTTCAGGCAGTTAAAGGGAGATGAGGAGTGGTAAACAGCTCGCCATTTTTACTGCGA
GAGGGGTGCCCGCCCCAACCAAGCCTGTTACGACAACAGGGCATTCCCTTCATCTTACCA
TCTGATCCC
>Zea_mais
GATCCTTCAGGCAGTTAAAGGGATATGATGAGTGGTAAAACTCGGTTTTTTTTATTCCGA
GAGGGGTGCCTGCCCCAAATAAGCCTGTTACGACAACATGGCGCTCACATTTTTTACCAT
CTGATCCC
>Eragrostis_curvula
GATCCTTCAGGCAGTCAAAGGGATATGATGAGTGGTAAAAGCTCGCAAATTTATCTGCGA
GAGGGGTGCCTGCCCCAAATAAGCCTGTTACGACAACAGAGCACTCACATGCTTCACCA
TCTGATCCC
>Setaria_italica
GATCCTTCAGGCAGTTAAAGGGACATGATGAGTGGTAAAACTCGCGATTTTTACTGCGAG
AGGGGTGCCTGCCCCAAATAAGCCTGTTACGACAACAGGGCACTCACAGCGTTTACCATC
TGATCCC
>Dioscorea_rotundata
GATCTTTCAGGCGGTCCAATGGGAGGTAATGAGTGGTAAAAGCTAGCGCTTTGATGCGTG
ATGGGTGTGCAAAGCCTGTTACGACAATGAGCACACTCTAATCTTTGCCAATATGATCCC
```

- **Fungi (budding yeasts)** – See also Sharma et al (2017) PLoS Genet

```
>S_cerevisiae
ATGACCTTCCAAGTTTTTAAAAGAATACGATGATATTATTTGCGTTTTCAAATCGAACAAT
TCTTCTCGGAGCGATCTGAGGTTTTAATGGAGATAGCGGTTCTGCGCAACCCATTGATC
TTGTTACATTCTTAAGAATGACAAGGACGCTTTTATAAAATTCTGATTCTTT
>K_lactis
ATGACCTTCCAAGTTTTTAAAAGAAGACGATGATACTATTTGCGCTTTTTTAATTCTTACA
ATTCTTTCGTGGATGGGAATTATTTTCTGTTTCATGGTTTTAATGGAGAATGTGGTGCCCT
CGCAAGCCTTATAATCTTGTTACATTCTTTGAATGATTTGGGACACTTTTTTATAAAATTC
TGATTCTTT
>C_glabatra
```

ATGACCTTCCAAGTTTTATTAAGAAGACGATGAAATTATTTGCGTGAATCCTATTTCGAACA  
ATTCTTCTTGCATCCTATCGTGAGGTTTTAATGGAGAAAGCGGTACCAACGCAGACCTT  
ATTTCTTGTTACATCCCTAGTTTCTTTTCGAGGAGCTAGTTTTCTGGACGCTACTAGAAAA  
TTCTGATTCTT  
>S\_eubayanus  
ATGACCTTCCAAGTTTTTAAAAGAACACGATGATACTATTTGCGTTTTCAAATCGAACAAT  
TCTTCTCGGAGCAATCTGAGGTTTTAATGGAGATAGCGGTTCTGCGCAGCCAATTGATC  
TTGTTACATTCTTAAGAATGACAAGGACGCTTTTATAAAAATTCTGATTCTTT  
>C\_albicans  
ATGACCTTCCAAGTTTTTATACTTACATGATGAAATCTCGCGTTATATTCAACGATTTCGGC  
CCTTCTGTTGACTGGTTTTCTTTTATGAGAAGTTGAGTCTTTTTTCGGAGGATTCTTTTTT  
GTAAGTTCATGGGAAACTGGTTAGTAGAAAATGACTTGACCGTCAGGGTAATGAAGTTG  
ATGAAGGTGTCTGGCGCAACCATTATCTTGTACATATATTTTCAGACGCTATAGAGAACT  
TCTGACCTA  
>A\_gossypii  
ATGACCTTCCAAGTTTTTATAAGAAGTGGATGATATGATTTGCGTAGCAACTCGAACAAT  
TCCTCGCCTGTGATCAGGCTGAGGTTTTAATGGAGAAAGTGGTGCCCGCAGCAAATAA  
TCTTGTACATTCTTTGAATGCCTGGGACACTTGCTATAAAAATTCTGATTCTT  
>L\_fermentati  
ATGACCTTCCAAGTTTTTATAAGAAGAAGATGAAATTATTTGCGTTTTCAATTCGAACAAT  
TCTTCTCAGTGTAGCTTAGCTGTACTTTGAGGTTTTGATGGAGAATGTGGTTCTGCGCAG  
CTTTTTAATCTTGTACATTCAATGAATGCTCAAGGACACTTTTTTAGAAAATTCTGATTC  
TTT  
>S\_passalidarum  
ATGACCTTCCAAGTTTTTATACTTACATGATGAAATCTCGCGTTTTTAAATCATTTCGACAAT  
TCCCTTTCGAGGTTGAGTTGTTCCCTTCGGGAACGATTCTTTGGAAAATGCTTCTTTCC  
AGGAGCTGGGTTTTAATGGTGCAGGTGTCCGGCGCAACAATTCTTGTACTAAATTTACG  
GACGCTGAGGAGAGCTTCTGACCCC  
>C\_lusitaniae  
ATGACCTTCCAAGTTTTTATAACAAATGATGAAGTCTCGCGTGCATCTATACTATTCCCTC  
TGGAGTTGCAGTCGGAGCTTTCGGGCTCTGACTCCTCCGGAATGCTTTTTCCGTACGGGA  
AAGTTGGGTTTGTGTGGTGAAGTGTGGCGCAACCTTTCTTGTACATTTGACAAAACA  
CTGAAAGAATTTCTGATCCAA  
>C\_jadinii  
ATGAACCTTCCATAGTTTTTAACTAACGTGATGAAATCTCGCGTCTATCTCTTCTAACGA  
TTCTTCCCTCGGAGGTGTGAAAGCACATTTTCGAGAATGGATGCCTTTTAGGCGTTCTGGG  
TTTCGATGGGGATGGGCATTCGACGCAACCTTTTCTTGTACATAACTATTTGGATGCTC  
TAAGGAGAAGTTCTGATTTAC  
>A\_rubescens  
ATGACCTTCCAAGTTTTTATACTATGATGAAACTTAGCACTTCTGAAACTCTGACCGATT  
CCCTTTCCTATGAAATTGCCGGTGTCTCAGCGCCGGCTTGGGTTTTGAATGGAGTCAACG  
CTTGGTGCACAATTCTTGTACAACTTAAAGCGTTTGTCTATTTCTGATCCTT  
>W\_anomalus  
ATATCCTTCCAAGTTTTTATACTATATGATGAAGTCTCGCGTTTTCTTCTAACAAATCCCC  
AAGGTTGAGTACTGGCAACGTTATTCTTTGAATGGTGTGGTTTTAAATCATATCTGGG  
TTTTAATGGAGATGGTGTTCGGCGCAAATTTATCTTGTACAAATTAATTATTAGGACGC  
CTAAATGAGAAATTCTGACCCCT  
>S\_stipitis  
ATGACCTTCCAAGTTTTTATACTCATATGATGAAATCTCGCGTTTCTATCCATGACAGATC  
CCTCTGGAGTTGAGTTGAAGTTCTGCTTCGATTCTCCGGAACGGCCTCTTGTACGAGA  
GACCTGGGTTCTACTGGTGTAGAGCGTTTGGCGCAACCATTCTTGTACATAAAGAAAAGA  
CGCTGAAAGAATTCTGACCCC  
>D\_hansenii  
ATGACCTTCCACGTTTTTATACTCATATGATGAAATCTCGCGTTATTCAAGACAATTCCCTTT  
AGAGTTGTAGTCTTTCTTTTCGGGAGAGATTCTCTGAAATTGCTTTCTCATACGAGAGAG  
TAGGGTTTTATTGGTTAAGGTGTTTGGCGCAAATCTTGTACAAAAATATCACAGA  
CGCTTAAGAGAATTCTGAACCTC  
>B\_inositolovora  
ATGAACCTTCCAAGTTTTTATACTCATATGATGAAGTCTCGCGTTTCTCATGACAGCTGG  
CCCCTCTCCTGAAGTTGAGTTACCTCACGGTATTCTTTGGGGGGAAATTTAGTCCTTG  
TATGAGGGCTAGGGTGCTAATGGTGTGATTTCGGCGCACAAACCATAATCTTGTACAA

TTTTATTTAACGGATGCTTTGGAGAATTTCTGACCCC

>P\_tannophilus

ATGACCTTCCAAGTTTTATTTACATGATGAAATCTCGCGTACTCCATATTATGACTTTTC  
CCTTCTTCTTTTTTTTTATTCCGTATTTCAAGCTGGTTTTGTTTTCGCCTTACACAGGCTTGA  
GACAAGATTAGATTTGGAAGGAATTTCTATATGAAGAAAAATTTCTTTTCTTATGGGA  
AGGAAAATGGGTTTGTAGTGGGTAATGGCGATTGGCGCAAACCTTTCTTGTACACAATT  
AATTTTTACAGTCGCTATAAATGAGATGTTCTGACCCCTT

>O\_polymorpha

ATTATCCTTCCCTAGTTTTTACTAAGAAATGATGAAAACCTAGGCGCTGTTTTTTAACACAC  
CCGGTTTTCCCTCCTTCGGGAATAAGTTGTTCTTCGGGATGGCTTTGGGAAAGCGTGGGTG  
AAAGCGTTTGGCGCAAATTTATCTTGTACAAACATTTGTTGCAAGACGCTTTTGTACCTT  
CTGAATT

>P\_membranifaciens

ATGACCTTCCCTAGTTTTTACTATAACATGATGAAAACCTAGGTGTTGTCTGTTGACACATC  
CGGCATCCCTCCTTCGGAAGTGTCTTTATGGCAGCCGGGATGGTATGGGTGACTGCGT  
TTGGCACAATTTCTTGTACATAAAAACGACGCTTTCATTTTGTACATTCTGACCCC

>L\_elongisporus

ATGACCTTCCAAGTTTTTATACTACATGATGAAATCTCGCGTTTATTCATTCATTGATTAA  
AGTCCCTTTCTCAAAGTTGTAGTCGGGGTCTTCTTTTCGTTTGTAGAGGGGGCTCTTGATTC  
CTTTGAGAGATGTGTCTCTTGACGGAGGCTGGGTATTTAAATGATGAAAGGTGTCTGGCG  
CAACCTTATCTTGTACATTTTACAGACGCTTAAAGAGAACTTCTGACCCCT

>T\_phaffii

ATGACCTTCCAAGTTTTTAAAAGGATATGATGAAGTTATTTGCATTTTTAATCGAACAAAT  
TCTTCTCAATATAATTGAGGTTTTAATGGAGATTGCGGTGCCTGTGCAGAAAATTATCTT  
GTTACATTCAATTGAATGAATCAGGACGCTATATTAGAAAATTCTGATCCTT

>Y\_lypolytica

ATGACCTTCCACGTTTTTAAACGTTTTATGATGAAAATTATGCGTGCTAGCTGATTTGCCCC  
CTCCTCGGAGGTAGTCCTTGACCGGACGGCGGCATCTTATGTTGATAGCGTTTGGCGCAC  
TTACCTTGTTTTAAACAAACGCGGTAGTACTTTCTGATCCTT

>N\_fulvescens

ATGACCTTCCACGTTTTTATAATGTGTATGATGAAAACCTACGCGTTTATCAACTTAGCTT  
GCCCCCTGGTTCGAGTCTACTACGTTGATAATTTGGAGGAAAGGAACCTGTTTTTTTTTAC  
TAGGTTATTGACCGGTGGAATCCTGGGCGTCCCTGACCGGACTGGGCGTAGCATGGTGAT  
AGCGTTCGGGCGCAACATTACCTTGTTTTTACGAACGCTTTTGTACTTTCTGATCCCT

>L\_starkeyi

ATGACCTTCCAGCGTTTTACGTTGTACATGATGAAAACCAGGCGTTAGCTGTTCGGATATG  
TGTCGGGTGATTTAGTTTCGCTTTGCGACCGTATGTATGTGATGACGGCGTTTCGACGCA  
ACCTCTTGTTACGTTACCAGGACGCTTTTGGTACCTTCTGATTTTTT

>E\_cymbalariae

ATGACCTTCCAAGTTCTATAAAAAGGTGATGATATTATTTGCATTTCTAAATCGAACAAAT  
TCTTCTCGTGAGCTTTATGCACCTCGAGGTTTTAATGGAGAATGTGGTGCCTGCGAGCC  
TTATAATCTTGTACATTCAATTGAATGCCAAGGGACACTATAATCGTTAGATAAATCTGA  
TTTTT

>V\_polyspora

ATGAACCTTCCAAGTTTTTAAAAGAGTGCAGTACTATTTGCATTTATTAAATCGAAC  
AATTCTTCTCGGTGGACTAGATAATATCTAATTTACTGAGGTTTTAATGGAGAATGCGGT  
TCCTATGCAGCCAATATAATCTTGTACATTCAATTGAATGACAGGACGCTAATATTATG  
AAATTCTGATTCTT

>T\_blattae

ATGACCTTCCAAGTTTTTATAAGAATACGATGATATTATTTGCGTAATAAGCTAACAAAT  
CTTCTCGTGGGTTTTCGGCTCTGTGAGGTTTTAATGGGGAATGCGGTTCCCGCGCAGCCA  
ACCAATCTTGTACATTTTTTTTTAAAATGATTTTTTGGGACGCTACAATATAAAAATTCTG  
ATTCTTT

>L\_thermotolerans

ATGACCTTCCAAGTTTTTATAAGAAGTGGATGATATGATTTGCGTAGCAACTCGAACAAAT  
TCCTCGCCTGTGATCAGGCTGAGGTTTTAATGGAGAAAGTGGTGCCCGCGCAGCAAATAA  
TCTTGTACATTCTTTGAATGCCTGGGACACTTGCTATAAAAATTCTGATTCTTT

>T\_delbrueckii

ATGACCTTCCAAGTTTTTATAAGAAGTGGATGATATGATTTGCGTAGCAACTCGAACAAAT  
TCCTCGCCTGTGATCAGGCTGAGGTTTTAATGGAGAAAGTGGTGCCCGCGCAGCAAATAA  
TCTTGTACATTCTTTGAATGCCTGGGACACTTGCTATAAAAATTCTGATTCTTT

bioRxiv preprint doi: <https://doi.org/10.1101/2021.11.30.470322>; this version posted November 30, 2021. The copyright holder for this preprint (which was not certified by peer review) is the author/funder. All rights reserved. No reuse allowed without permission.

>Z\_rouxii

```
ATGACCTTCCAAGTTTTAAAAGAAGAAGATGAAATTATTTGCGTCTATTAAATCGTACAA
TTCTTCCCTCGGGTTTTAAAGCTCGTGGGGTTTTAATGGTGAAGACGGTTCCCGCGCAGC
AATTTTTCTTGTTACACCAATTTAATGGTTTTATAGGGACGTCTCTAGGAAATTCTGAT
TCTTT
```

## Supplementary data S2

>H\_sapiens

MRQLQKKIKNGTLNIKQDDPFELFIAATNIRYCYYNETHKILGNTFGMCVLDQDFEALTPN  
LLARTVETVEGGGLVIVILLRTMNSLKQLYVTMTMDVHSRYRTEAHQDVVGRFNERFILSLA  
SCKKCLVIDDQLNILPISSHVATMEALPPQTPDESLGPSDELRELKESLQDTQPVGVLV  
DCCKTLDQAKAVLKFIEGISEKTLRSTVALTAARGRGKSAALGLAIAGAVAFGYNSNIFVT  
SPSPDNLHRTLFEFVFKGFDALQYQEHLDYEIIQSLNPEFNKAVIRVNVFREHRQTIQYIH  
PADAVKLGQAEVLVIDEAAAIPPLVKSLGPLYLVMFMASTINGYEGTGRSLSLKLIQQLR  
QQSAQSQVSTTAENKTTTTARLASARTLYEVSLQESIRYAPGDAVEKWLNLDLCLDCLNI  
TRIVSGCPLPEACELYVNRDTLFCYHKASEVFLQRLMALYVASHYKNSPNDLQMLSDAP  
AHHLFCLLPPVPPTQNALPEVLAVIQVCLEGEISRQSILNSLSRGKKASGDLPWTVSEQ  
FQDPDFGGLSGGRVVRIVVHPDYQGMGYGSRALQLLQMYEGRFPCEEKVLQETPQEIHT  
VSSEAVSLLEEVITPRKDLPLLLKLNERPAERLDYLGVSYGLTPRLLKFWKRAFVPVY  
LRQTPNDLTGEHSCIMLKTLDDEDEADQGGWLAAFWKDFRRRFLALLSYQFSTFSPSLAL  
NIIQNRNMGKPAQPALSREELEALFLPYDLKRLEMYSRNMVDYHLIMDMI PAISRIFYLN  
QLGDLALSAAQSALLLGLGQHSVDQLEKEIELPSGQLMGLFNRIIRKVVKLFNEVQEK  
AIEEQMVAAKDVVMEPTMKTLSDDLDEAAKEFQEKHKKEVGLKLSMDLSEYIIRGDDEEW  
NEVLNKAGPNASIIISLKSDDKRRKLEAKQEPKQSKKLNRETKNKKDMKLRKK

>M\_musculus

MNRKKVDNRIRILIEINGVAERQSLFVVVVGDRGKDQVVILHHMLSKATVKARPSVLWCYK  
KELGFSSHRKKRMRFSHNKIMSGTLYLKQDDPFELFVAATNIRYCYYNETHKILGNTFGM  
CVLQDFEALTPNLLARTVETVEGGGLVIVILLRTMNSLKQLYVTMTMDVHSRYRTEAHQDVV  
GRFNERFILSLASCKKCLVIDDQLDILPISSHVASIEALPPQAPDENLSPAALLELLELKE  
SLQDTQPVGVLDCCCKTLDQAKAVLKFIEGISEKTLRSTVALTAARGRGKSAALGLAIAG  
AVAFGYNSNIFVTSPSPDNLHRTLFEFVFKGFDALQYQEHLDYEVQSLNPEFNKAVIRVNV  
FREHRQTIQYIHPADAVKLGQAEVLVIDEAAAIPPLVKSLGPLYLVMFMASTINGYEGTG  
RSLSLKLIQQLRQQSAQSQVSTTAENKTTTTARLASARTLHEVSLQESIRYAPGDAVEKW  
LNLDLCLDCLNITRIVSGCPLPEACELYVNRDTLFCYHKASEVFLQRLMALYVASHYKN  
SPNDLQMLSDAPAHHLFCLLPPVPPTQNALPEVLAVVQVCLEGEISRQSILNSLSRGKKA  
SGDLPWTVSEQFQDPDFGGLSGGRVVRIVVHPDYQGMGYGSRALQLLQMYEGRFPCEE  
EKVLETPQEIHTVSSEAVSLLEEVITPRKDLPLLLKLNERPAERLDYLGVSYGLTPRLL  
KFWKRAFVPVYLRQTPNDLTGEHSCIMLKTLDDEDEAEQGAWLAAFWKDFRRRFLALLS  
YQFSTFSPALSLNIIQNRNVAKSALPALGREHLEALFLPYDLKRLEMYSRNMVDYHLIMD  
LIPAIRSRYFLNQLGDLALSAAQSALLLGLGQHSVDQLEKEIELPSGQLMGLFNRIIR  
KVVKLFNDVQEKAIIEEQMVAVKDVVMEPTMKTLSDDLDEAAKEFQEKHKKEVGLKDMDL  
SQYVIRGDDEEWNEVLSKAGQNASIVSLKSDDKRRKLETKQEPKQS

>R\_novergicus

MHRKKVDNRIRILIEINGVSEQRSLFVVVVGDRGKDQVVILHHMLSKATVKARPSVLWCYK  
KELGFSSHRKKRMRQLQKKIKSGTLNIKQDDPFELFVAATNIRYCYYNETHKILGNTFGM  
CVLQDFEALTPNLLARTVETVEGGGLVIVILLRTMNSLKQLYVTMTMDVHSRYRTEAHQDVV  
GRFNERFILSLASCKKCLVIDDQLNILPISSHVASIEALPPQAPDENLSPAALLELQELKE  
SLQDTQPVGVLDCCCKTLDQAKAVLKFIEGISEKTLRSTVALTAARGRGKSAALGLAIAG  
AVAFGYNSNIFVTSPSPDNLHRTLFEFVFKGFDALQYQEHLDYEVQSLNPEFNKAVIRVNV  
FREHRQTIQYIHPADAVKLGQAEVLVIDEAAAIPPLVKSLGPLYLVMFMASTINGYEGTG  
RSLSLKLIQQLRQQSAQSQVSTTAENKTTTTARLASARTLHEVSLQESIRYAPGDAVEKW  
LNLDLCLDCLNITRIVSGCPLPEACELYVNRDTLFCYHKASEVFLQRLMALYVASHYKN  
SPNDLQMLSDAPAHHLFCLLPPVPPTQNALPEVLAVVQVCLEGEISRQSILNSLSRGKKA  
SGDLPWTVSEQFQDPDFGGLSGGRVVRIVVHPDYQGMGYGSRALQLLQMYEGRFPCEE  
EKVLETPQEIHTVSSEAVSLLEEVITPRKDLPLLLKLNERPAERLDYLGVSYGLTPRLL  
KFWKRAFVPVYLRQTPNDLTGEHSCIMLKTLDDEDEAERGAWLAAFWTFRRRFLALLS  
YQFSTFSPALSLNIIQNRNIAKSAPPVGLGREHLEALFLPYDLKRLEMYSRNMVDYHLIMD  
LIPAIRSRYFLNQLGDLALSAAQSALLLGMGLQHSVDQLEKEIELPSGQLMGLFNRIIR  
KVVKLFNDVQEKAIIEEQMVAVKDVVMEPTIKTLDLDEAAKEFQEKHKKDVGLKDMDL  
SQYIIRGDDEEWNEVLSKAGQNASIVSLKSDDKRRKLETKQEPKQSKKLNRETKNKKDMKLRKK

>G\_gallus

MQRKVDNRIRIVLIEINGVAERQGLFVVVVGDRGKDQVVILHHMLSKATVKARPSVLWCYK  
KELGFSSHRKKRMRQLQKKIKSGTLNIKDDDPFELFIAATNIRYCYYNETHKILGNTFGM  
CVLQDFEALTPNLLARTVETVEGGGIVVILLRTMNSLKQLYVTMTMDVHSRYRTEAHQDVV

GRFNERFILSLASCKNCIVIDDLNLPISSHVANITPVPPQSQEDSLRPQDLELKE  
SLQDTQPVGVLDGCKTLDQAKAVLKFIEAISEKTLRSTVALTAARGRGKSAALGLAIVG  
AVAFGYSNIFVTSPSPDNLHTLFEFIFKGF DALQYQEHL DYE I IQSLNPEFNKAVVRVNV  
FKEHRQTIQYIHPADSVKLGQAELVVIDEAAAIP LPLVKKLLG P YL VFMAS TINGYEGTG  
RSLSLKLIQQLRQSSAQAVTMTAENKSTATAKLASARTLHEVSLHESIRYAPGDPVEKW  
LNDLLCLDCLSI TRI I SGCLPEDCDLYVNRDTLFCYHRASELFLQRLMALYVASHYKN  
SPNDLQMLSDAPAHHLFCLLPVPPTQNSLPEVLAVVQVCMERGEISRQSIMNSLSRGKKA  
SGDLIPWTISEQFQDPDFGALSGGRVVR IAVHPDYQGMGYGSRALNLLQMYEYEGKFPCL  
EKTVPKPEIATVSETVSLLEEVVTPRKDLPLLLKLSERQAESLDYLGVS YGLTPRLL  
KFWKRAGFVPVYLRQTPNDLTGEHSCIMMKMLNEEDVEQEPWLTAFWKDFRRRFLSLSY  
QFSTFSPSLALNILQNKNIKQSQPPI SRAELES AFIPYDLKRLEMYSRNMVDYHLIMDM  
VPTIARMFFLNQLGDISLSAAQSALLLGIQLQHKSLDQLEKEVELPSSQLMGLFNRI IRK  
VVQLFNTVQEKAVEEQMVATKDIVMEPTIKSLNDDLEEAKEFQEKHKQEVGKLEKEMDLT  
QYIIRGDDEEWNEVLSKAGQNASIISVKSEKRRKLETVRGHKQKQKFKKTKDIKQKRKK  
>D\_erio

MATFRKKVDNRIRVQIENGVAEHRSMFVI VGDGRDQV VILH HMLSKATVRARPSVLWC  
YKKELGFSNRKKRMRQLQKKIKTGTLNLDQDDPFELFVAATNIRYCYYNETHKILGNTF  
GMCVLQDFEALTPNLLARTVETVEGGGIVVILLRTMNSLKQLYTMTMDVHSRYRTEAHQD  
VIGRFNERFILSLSSCKSCVVIDDLNLPISSHATNIKPIPPKKQDDGLSPREQLKDL  
KESLQDTQPVGVLDGCKTLDQAKAVLKFIEAISEKTLRSTVALTAARGRGKSAALGLAM  
AGAVAFGYSNIFVTSPSPDNLHTLFEFVFKGF DALQYQEHL DYE I IQSLNPEFNKAVVRV  
NIFKEHRQTIQYIHPADAVKLGQAELLVIDEAAAIP LPLVKKLLG P YL VFMAS TINGYEG  
TGRSLSLKLIQQLRQSSSESQONLSAENRNTSTARLAAARSLHEVTLHESIRYGGQDHVE  
RWLNDLLCLDCLSVPRIISGCLPQTCDLYVNRDTLFCYHKASEAFLQRLMALYVASHY  
KNSPNDLQMLSDAPAHHLFCLLPVPPTQNSLPEVLAVLQVCEGEISRQILSSLSRGK  
KASGDLIPWTISEQFQDPDFGALSGGRIVRIAVNPDYQGMGYGTRALQLLQRYEYEGQFPL  
WDEQEQTMTSAITSVSEAVSLLEEVVSPRKDLPLLLKLNERRAERLDYLGVS YGLTPQ  
PLKFWKAGFVPVYLRQTPNDLTGEHSCIMLKDNLNSEDLDQNLQWLSAFWKDFRRRFLSL  
MSFQFSKFSSTLALNILQNKSAKDDSTAVLTSAE LAATFTPYDLKRLEMYSRNMVDYHLI  
MDMIPVIARMHFLKQFGDISLSVAQSALLLGIQLQHKSVDELEKEIGLPSSQLMGLFNRI  
IRKVVQFFNTLQERAVEAEMVATKDIGLEPTVQTLNEDLNDAAKEFDEKHKKDI EKIKDM  
NLSEYMIRGDDEEWDQVLKAGHTAIVSIKGDKKRKL EGTNQE QREGKMKKIKDKRKG  
FGKKT

>X\_laevis

MQRKKIDNRIRVLIENGVAQKHSFFVVDGHDGKDQV VILH HMLSKATVRARPSVLWCYK  
KELGFSSSHRRKKMRKLQKRIKSGSLNIKEDDPFELFVAATNIRYCYYNETHKILGNTFGM  
CVLQDFEALTPNLLARTVETVEGGGIVVLLLR TMS SLKQLYTMTMDVHSRYRTEAHQDVV  
VRFNERFILSLASCKTCMVIDDLNLPISSHIANIKPIPPKTQDDSLSP EEQELQDVKL  
SLQDTQPVGVLDNCKTLDQAKAVLKFIEAVSEKTLRSTVTLTAARGRGKSAALGLA IAG  
AVAFGYSNIFITSPSPDNLHTLFEFIFKGF DALQYQEHL DYE I IQSLNPEFEKAVVRVNV  
FKEHRQTIQYIHPADAVKLGQAELVVIDEAAAIP LPLVKKLMG P YL VFMAS TINGYEGTG  
RSLSLKLIQQLRQSSADSQVTLTAENKSTASNKLVSARTLHEVTLQESIRYAPGDHVEKW  
LNDMLCLDCMNI SRI I SGCLPETCELYYINRDTLFCYHKASESFLQRLVALYVASHYKN  
SPNDLQMMSDAPAHHLFCLLPVPPTQNSLPEVLAVVQVCEGEISRQILSSLSRGKKA  
SGDLIPWTISEQFQDPDFGALSGGRVVR IAVHPDYQGMGYGSRALRLVQMYEYEGQFPCLE  
ENAANKPQEITSISGEAVSLLEESLTPRKNLPLLLRLSERPAEKLDYLGVS YGLTPKLL  
KFWKRAGFVPVYLRQTPNDLTGEHSCVMLKTLHEDEESDQEPWLTAFWKDFQKRFLSLS  
YQFSTFTPALALNILQNRNIKKQSENLI SRSQLEGALTPYDLKRLEMYSRNMVDYHLIMD  
LIPSLARMYFLQQLGGLSLSAAQSALLLGIQLQHKGVDQLEKEIELPSSQLMGLFNRI IR  
KVVQLFNRIQERAVEEEMVT TKEVMEPTL KSLQEDLEEAGKEFQEKHKQEV EKLKGINL  
SEYVIRGDDEEWNEVLKKTGQNASVISMKSDMKRKL EKEPEKEGFKQKLLKKNKEKKQKFA

>P\_marinus

MSRKKVDNRIRVLIENGFSQKYRTL FVVVDGDKGDQV VILH HMLSKAAVKARPSVLWCYK  
KELGFSSSHRRKKMRQLQKKLKTGTL DVKHDDPFELFVAATNIRYCYYNETHKILGNTFGM  
CVLQDFEAMTPNLLARTIETVEGGGLAVILLRTMNSLKQLYTMTMDVHTRFRTE SHQDVV  
GRFNERFILSLASCKTCMVIDDLNLP LSTHTL CISPLPPKPQDESLS PSEIELGDLKE  
SLQDTQPVGVLVSCCKTLDQAKAVLKFIEAISEKTLRSTVALTAARGRGKSAAMGLAIAS  
AVAFGYSNIFVTSPSPDNLHTLFEFLFKGF DALQYQEHL DYE I IQSTNPEFNKAI VRVNI  
YKEHRQTIQYIHPGDAAKLGQAELVVIDEAAAIP LPLVKSLG P YL VFMAS TINGYEGTG  
RSLSLKLIQQLRQSSQSQVMTKAENKNTAVSKLASARSLHEVTLDESIRYAPGDPVEKW  
LNDLLCLDCLNIQRVSVGCPVPTCDLYVNRDTLFCYHKASEAFLHRLMSLYVASHYKN

SPNDLQMLSDAPAHHLFCLLPVQATQNALPEVLAVIQVCLEGEISQQSIMSSSLARGKRA  
AGDLIPWTIISEQFQDPDFGSLSGGRIVRIAVHPDYQGMGYGSRALRLLQMYEYEGKFPCLD  
ETASQTQGHISSIASDAVGLLEETLTPRRDLPLLLHKLSEKPTERLDYLGVSFGLTPQLL  
KFWKRSQFTPVYLRQTPNDLTGEHSCIMLKVLNEDEQMERPENWLAAYWKDFRRRFVTL  
SYQFSGFLPAVSLNILQNRNVKEKPAQALSKESEATFSPYDLKRLMYSRNMVDYHLIM  
DLVPGIARLYFTHRLPDMSLSAQAQLALLLVGLQHKAVEQLEKEIDL PVSQMLGLFNRIM  
RKAVQVFTAIQETAIEEQMTKVKEVMEPTVKSLAEDLEDAAKEFAEKHKKDLVQIKDMN  
LTEYVIRGDDKEWNEALKKVGPSASVVSITGEKRKSAEKDSSHDHKSKKSFQKGPGLG  
KPGKPGKPGGPGKAGKSRGGFKKQK

>C\_intestinalis

MRKKVDNRIRVLVENGVA TKHRTMFFIVGDKCRNQVILHHMLSKAQVRARPSVLWCYK  
ELGFSTHRKKMKQIQKRISSTGLDKENDPFELFVAATNVRYCYNETHKILGSTYGM  
VLQDFEALTPNLLARTIETVEGGGII CFLLRSM TSLKQLYTMTMDVHARYRTE SHSDVVG  
RFNERFLLSVASCNNCLIIDDELNVLPVSTNSQNI EAVPPKPAEDSLTPSEKELVDLKE  
LQDTQPVGCVINCKTIDQKALLKFVDAISEKTLRSTVVM TAARGRGSATLGLAISAA  
VAFGYSNIFVTSPPENLKTLEFEVFKGFDAL EYQEHLDYELIQSTNPDFNKAIVRVNVF  
REHRQTIQYIHPSDSAKLSQAELLVIDEAAA IPLPLVQSL LGPYLVFMSSTINGYEGTGR  
SLSLKLKQLRIQSATRNTATTQTTASPLGRNLSEITLEESVRYAPTDP IESWLNELLC  
LDCGSSSFSKI STGCPPPSACDLYYVNRD TLF CYHKASEAFLQRLMSLYVASHYKNTPN  
LQMLSDAPAHHIFCLLPVSAEQSLPDVLCVLCLEGEISKSSVSSLSRGKRAAGDL  
IPWTVTEQFQDHFASLSGARVVRIATHPDYQGMGYGSRALELLEKYYEGKMTSLDENET  
PAEEVNIVNEEEVEAMDEVLT PRKSLPPLLWKLSERRPEQLNYIGVSYGLTAPLLKFW  
AGYTSVYLRQTANDLTGEHSCIMLKALDTEVDKSWQDAYFDDFRRFISLLHFQFSSFKS  
STALQVLRKSKKTTKSNPLTKSELDFFLT SYDTKRLTLYSRNMADYHLVMDLLPTLARL  
VFLEKLVVPLSVAQKAIILAIGLQHKSVETVASEIDL PSSQVLGLFNRAVRKITTHLSEI  
ESAAA EKELKSTLGDENAADAVNMQPLEESLDSELNAAAYEVVQKQKEELKQTLASMDLK  
QYIEIGGSDEAWDALSSGKKQNI SVKSAKRPLPTSEEPDTKDKKKRKFKKKVKSA

>B\_floridae

MVLKKVDNRIRVLIENGVVQHHRGLFVIVGDKGKQVILHHMLSKAQVKARPSVLWCYK  
KELGFSTHRKKRMKQLQKKIRNGTLDVKEDDPFELFIAATNVRYCYAETHKILGNTYGM  
CVLQDFEALTPNLLCRTIETVEGGGIIACL LLSMNSLRQLYTMAMDVHSRYRTEAHRDVV  
GRFNERFLLSLSSETCMVIDDQNLNIPIS SHILNISAVPSRSKEDSLNPAEVELKGLKE  
SLQDTQPVGSLVNCKTLDQAKALLKFI EAISEKTLRSTVAMTAARGRGSAAALGLA IAG  
AVAFSYSNIFVTSPPENLNTLFEFVFKGFDALDYQEHMDYELVQSTNPDFHKAVRVNI  
YREHRQTIQYLHPSDAQKLGQAELVVIDEAAA IPLPLVKS LMGPYLVFMAS TVNGYEGTG  
RSLSLKLIQQLRQONATFGGNSEAKAAAAMATKTEGGASATGRTLHELVLTESIRYASED  
PVEAWLNRLCLDVSSVPRVHSGCIPASCDLYYVNRD TLF CYHKASEAFLQRI MSYVS  
AHYKNTPNDLQMLSDAPAHHLFVLLPPVDPDQSALPEVLCVVQVCLEGEISKQSIMSGLS  
RGKRASGDLIPWTVSQQFQDTEFASLSGGRVVR IATHPDYQGMGYGMRALQQLDMYYQ GK  
VPSLSEDTGTAQGLPAVDKETVSLLEEKLGPRKNLP LLSKLSERPAERLDYLGVSYGLT  
APLLKFWKKAGYAPVYLRQTPNDLTGEHSCIMLKRIQEDDEGQD TDWLSAFWTFRRRFL  
SLLSYQFRTFQPALSLSILQAKKDVKTDT SVLTQGDLYAHLTQYDLKRLDLYSRNMVDYH  
LIMDLLPALARMYFLQKLDTSLSVAQSA ILLGLGLQHKTVDDLERELELPASQVMGLFNR  
LVRKIVQFLSSIEEQAVESELLAPKEVMEPTAQSLKTELAEEAKEFEDKQKELKLLKD  
MDLEKYVIKGETEWESALTSGLKSGVSVASGKKRKEEAAPTPESTKKKSKKFKKDKKF  
KKT

>S\_purpuratus

MVRKKIDNRIRVQIENGVTQGHRSFLVVGDKGKQVILHHMLSKAVVKARPSVLWCYK  
KELGFSSHRKKRMKQLQKKIKGGMVDVSDDDPFELFIAATNIRYCYSETHKILGNTYGM  
CVLQDFEAMTPNLLARTIETVEGGGIVVILLRSVSSLQQLYTMSMDVHSRYRTE SHQDVV  
ARFNERFLLSLSASDCMVDQQLQILPLSQHTLNIEAIPPRLRXVEDSQSPA EIELKEL  
KASLQDTQPVGALINCTKTLDQAKALLKFVESISEKTLRSTVSM TAARGRGSAAALGLAI  
ATAVAFGYSNIFVTAPSPENIRTLFEFIFKGF DGLDYQEHLDYELVQSTNPEFNKAVIRV  
NIFREHRQTIQYIHPGDAHKLSQAELVVIDEAAA IPLPLVKELLGPYLVFMSSTINGYEG  
TGRSLSLKLQQLRQONATFGVSSAANKASTSLSTGSSASGRVLHEVTLEESIRYSEGD  
SVEKWLNELLC LNVAEVQRISSGCPLPADCDLYYINRD TLF SYHKASEVFLQRLMSIYVA  
AHYKNTPNDLQLLSDAPAHHIFCLLPVKASQSGLPEILCVLQVCLEGEISKETIMSSLS  
RGKRASGDLIPWTISQQFQDNDFP SLSGGRVVR IATHPDYQGMGYGSRAMSLLQKYYQGE  
FPSMAETPETKTITTVKEAVGLLEEVIVPRKNLP LLSKLSERPAEKLDYIGVSFGLTA  
DLLKFWRKAGYLPVYLRQTANDLTGEHSCIMLKTVQESDTEGANQETWLTAFWTFRKR  
MSLCAYQFRAFKPSLALS VLFCKAYNKMKPQPM TATELELLFSKYDIQRLELYSRNMADY



HLITDILLPSVTRLVFLKKNINFQLSAVQFSILLGLGLQHKTVDVLEKETEVPVSQLLALFN  
RTVRKVVTELVNSVLEREVEKDMMEKVVNMEPTRQTMAQELDEAAAVIEAKQKKELAAALK  
GLDLSRYAIRGQSEWDDALKSGKKKNLISIKIANQEKRAAEKSKSTEKRRKGDRESLGGG  
DDDQEMSKKKKKKKFTPGKGSKN

>A\_mellifera

MVRKKIDNRIRILIEINGVITGYRTMFI I IGEKARDQVVLHMLSKS I IKARPSVLWCYK  
KELGFSSHRKKKMSLQKKVKSGLDVNEDDPFELFVVSTNIRYCYHETHRILGNTYGM  
CVLQDFEALTPNLLARTIETVEGGGLIIFLLQSVNSLKQLYTMNMDVHQFRTEAHQNI I  
GRFNERFLLSLASCKRCLVDDQLNVPLSSSHNLKIEPIQKLSSETLSELDTLKESLKD  
TQPISSLVNCCSTLDQAKVLLKFI ECISEKTLRSTVSLTAARGRGKSAALGLAVAAA I TF  
GYSNIYISSPSPENLNTLFEFIFKGF DALGYQEHL DYGLVQSTNPEFNKAI IRVNI FRDH  
RQTVQYIHPDHAHKL NQAELLVIDEAAA I PLPVKAMLG PYLIFLASTINGYEGTGRSLS  
LKLLQQLRNQTISSNSHEKQKNEK I IGRQLHELTLEESIRYKPGDSIEQWLCDLLCLNV  
IINTPILSGCPSPDICELYIINRDTLFSYHKASELFLQRLVALYVASHYKNSPNDLQMS  
DAPAHHLFCLLGPIDSNNKILPEILVVIQICLEGEINKNTINDGLVRGRRAGDLIPWTI  
AQYQDQDFPALAGARIVRIATHPEYQSMGYGSRALELLKKYEMKIVNINETSLOTCMT  
EISKVKNEEVNLLKEKIEPRVSLP LLLKLSERRPENLDYIGVSFGVTEPLLKFKYKRANF  
IPVYLRQTTNDITGENSCIMLYKINSDDITW LQAYW NDFRKRFI SLLSFSFN TYSPLA  
LSILFNKSITSEATTLTKNILDIYFTSYDLKRLSMYSNNMADYHLIMDLLPSLARLYFLN  
MDDIHL SAVQSAILLGLGLQHKTVDTLAKELDLPTTQLLGLFNRIIRKFIQYLNK I TEN  
FIETMMKIEGNNETIQLNPI NGKSLYDELENAAKELKAKQKAELEK LKENLEQYAIKG  
TEADWNVALSEKSKNLISIKSGEKRELEHNILEENKQFKKKKKHFSKI

>A\_gambiae

MVKKKIDNRIRVMIENGVKLGHR TMFVI VGNKARDQVP ILYDILTKASVKARPTVLWCYK  
NKDEAISNHGKKRAK I QSGKIDINESDLF DAFRVATTIHGRYKDTHTILGKTYGVCVL  
QDFEALTPNLMARTVETVEGGGLI ILLLKT I SSLKQLYTMSMDVHKRYRTEAHQNVTCRF  
NERLILSLADCSRCLLVNDDLTVLPLSSRTADV KPIDVASIENVQSEQLAELKESLADAP  
PAGPLVNL CRTYDQAKAVAQFIDALAEKQLKPPTSLTAGRGRGKSAAMGLA IAGSIAFGY  
VNVYVTS P SPENLITLFEF I LKGF DVLEYQEHTDYTI IRSTNPNFNKAI IRINITRNNRQ  
TIQYISPTDAHLLNAADLLI IDEAAA I PLPMVRAMLGPYL VFMAS TINGYEGTGRSLSLK  
LLSQLQKETNAPLP I KLEESIRYSPGDPVESWLTSL LCLDATIVQNMNSGCPPPDECQLY  
YVDRDALFSYHKA AETFLQRI VSI CVSSHYKNSPNDLQMSDAPAHHLFCLLGP I VKNQ  
LPEILVVIQVCLGEISSTTLANSLVRGMKASGDLIPWNITEQFGDHEFPKLSGARIVRI  
ATHPNYQRMGYGKRALNQLKHYYEGRFPIESDGLGDEQGGDDNGIETIDDEVDLLKEVI  
TPRKKIPTLLKAL TERKPEMLDYLGT SYGLTGELLRFWKSQKFVVPVYLSQKENELTGEHS  
CIMLCPINSTVERVETNEWLN DYFLDFRRRVLKLLGKSFNKFTTSLALS LLENKAVKMEG  
KALTQTTIDEVFLPHDVQRLEMYIHNQVEYKLIMDLTSDLASLYFQ GKMSGAH I ETLHKA  
ILLGCGLQHKTI DKLMEELNMP SNQVLAKFYDCVKKLTNYILRTMESTIESGMAKPSELN  
MGENLVPLKQSLDDEFAEDVKTLEKQKKE LAKLKLNL DQYAIKGTDEEWSKVLSSNKS  
TIVSIKSGEKRLNENADDSMSAETGDVSAFQKKKAKFGKKQKSRNNKG

>D\_melanogaster

MVKKKIDNRIRVMIENGVKLGHR TMFVI VIGDKARDQVP ILYDILTKSTVKARPTVLWCYK  
NKDEAISNHGKKRAK I AVGKVDVNEADLFD SFRVATTIHGRY YSETHAVLGR TYGVCVL  
QDFEALTPNLLARTVETVEGGGLI ILLLKT I QSLKQLYTMSMDVHKRFRTEAHQTVTCRF  
NERLILSLADCSRCLLVNDDLTVLPLSSKTINVEPVNPAGAGRSPNEASLKEKESLTLV  
QPAGALVNLCKTYDQANAVAQFIEALVDKQLKPPMSLTAARGRGKSAALGLSIAAAVAFG  
YVNIYVTS P SPENLITLFEFV LKGFDALEYQEHADYTI IRSTNADYKKA I IRINITRSSR  
QTIQYIAPSDTHLLNAADLLL IDEAAA I PLPLVKKMIGPYLVFMAS TINGYEGTGRSLSL  
KLISQLQKDNAR PPLKLEESIRYQENDDIEKWLINLLCLDASTVPSISSGCPTPDACEL  
YYVDRDALFSYHKA AEFHLRLVSIYVSSHYKNTPNDLQMSDAPAHHLFCLLGPVQRM  
ALPEILVVIQVALEGQISAQSISDSLGRGKKAAGDLIPWNVAEQYGD RDPKLCGVRIVR  
VATHPNYQRMGYGKRAIQLLKDY YARKHTNLEDGPVASKDAGKGI EEEVEEELSLKEQI  
RPRSRIPTLLQRLHERVPEHVDYIGTSYGLTTELLKFWKNAGFVVPVYLSQKSNELTAEHS  
CIMLHTPNATPWLGLYQDFRRRVLKLMGKTFREFETKLC LALLKNKSVDT EGSALKVLD  
KPMLDVYFLPHDLQRLESYARQQSEFRLIIDLTDIAQLYFQGRIDGLQLDLVQQGILLA  
LGVQGKTVDALGLELNMPGNQLLAKFFDAMKRCNQCFRSVLEEHIEGMLREADLSKGEE  
LQPLTSLDKELDQTAQKLSKQQRKELKRLKAEQLDEFQIKGTEEDWSKALETNGTGGGS  
GLLSVKS GVKRLDGP I ETREDGD LAAPLSKKKKKNNPKQRRSQGKSLI

>B\_mori

MVKKKIDNRIRVMIENGVKLGHR TMFL IIGDKSRDQVP ILYDMLVKSTVKARPTVLWCYK  
NKDEAISNHGRKRAK I AAGKLEVSEESLFD AFRVATTIHGRY YSESHAMLGQTYGVCVL

QDFEALTPNLMARTIETVEGGGLIIFLLKTMDSLRLQHSITMDVHSRFRKTEAYDTPVNRFR  
NERFLLSLADNPRCLVLDLSTVLPISSKTAQIDPVDATPERVNPVKLTELISLSDSPPA  
GPLVALTRTYDQATALIALINTLADKQSRPPHCLTAARGRGKSAACGLAVAAVAALGYVN  
IYVTSPPHENLITLFEFLLRGLDACLYQEHIDYNIVRSTNPDFKKAIVRVNIARNRQTV  
QYITPDDHSLLSAADLVLVDEAAAAIPLVHVAAAAQKAPLALLSSTVSGYEGTGRALSCLK  
FAQLQTQHNAPPIKLDPEIRYRTGDPISWLNLSLLEAPPSSMGVGGAPPAACELRV  
NRDALFCYHKAEEAFLHRLVSIYVASHYKNSPNDLQLLADAPAHCLFVLLAPPRAAALP  
ELLCVLQCLLEGNISDKSVRDSLGRGRKAAGDLIPWNI CEQFGDKDFPKLSGARIVRIAT  
HPAYQRMGYKRALQYLAAYYSGDIPCLDEDASDAETDRQTDAQSTLQETIAPRSKPPT  
LLKRLTEVRPNLDYLGTSFGLTEDLLRFWKSQKYVPVYLSQKANELTGEHSCIMLRALR  
DAAWLGAYSADFTRRAARLLPRTLRLPAALALSTLVTDVSVKTNKPVLT KDLEIQYLTGH  
DLRLEAYSKQQADYRLITDLLQPLAELVFHTKSTIKLDAVQKVI F I AMGFQMKDVDDIA  
SELGLPGSQILAKFYEASKKINAALNAVLEDSAAKEIGIEDKAASGAAQPVQQSLQDELS  
KAAKDLEKQKELSKLMGEDLSQYRIKGSDDLWQALASTKQKTILSVKSGEKRLGEDM  
KEIDDLDLQTNKKKKKKKSFKN

>I\_scapularis

MTRKKIDNRLRVL IENGVHTGHR TMFVVVGEKGRDQVVI LHHMLSKTTVKARPSVLWCYK  
KELGFSTHRKKRMRQLQKKIKSGKLDVNEEDPFELFVAATNIRYCYHETHKILGQTYGM  
LVLQDFEAMTANVLARTMETVEGGGLVLLLLQSISLRLQLYTLAMDVHARYRTEAHQEVV  
GRFNERFILSLSSCEACLVDRLNILPVSTSAAGIAPVPRAPQDPEASELASLRASLED  
SQPLGALVAVCSTCDQARALLKCVDAVAEKTFRTTVAVTAARGRGKSAALGLAVAAVAF  
GYSNVFVTAPSPENLKTLEFVVLKGFDAKYEHEHQDYEVVQSSQPELNKAVRVTVFHEE  
HRQVVQVWHPGDSHLLGQAE LLVVDEAAAIPLPLVQKLLGPYLVFLSSTVNGYEGTGRSL  
SLKLIQQLRQQAAGDAGKSSSGGRVLHEVSLSESIRYRPGDPVEAWLNRLCLDANVPP  
ASGCPGDCQLFYVNRDTLFSYHRASEFLQOVVSLCVASHYKNSPNDLQMLSDAPAHH  
LFVLLPPVQPDRALPQVLCVLCVQCYEGGISRASVSDNFARGRRAGDLIPWTVSQFQD  
EEFAGLAGARIVRIATHPEYQRMGYGLRALELLTEYHLGHTPSLEEAEEAATPGAAGADET  
GAEAAERERLEPRKRLPPLLLRLSEKRPERLDYLGVSYGLTADLLRFWKKAGYVPVYLRQ  
TPSELTGEHSTIMLRCLQEGAQWLPQLWADFRRRFLSLLGYQFRVLKPATALSVLNRPLE  
DSVHPRVPSLAEVEREFTAYDLRRLLELYARNLVDHHLVTDLLPALARMHFLKALGDVHLS  
AVQSAIILLGLGLQHRTVDEL SRELDLPTSQLLGLFNRTVRKCATFLGALLEKSLDAALPR  
PSPALLPLQPVVQSLGDEL SGAAREIEARQKELKKLQOMDLSQYSIKGS DSEWKDALQQ  
PGKQLVSIKSINKRPQETDTPKEPKQKKKKKQK

>C\_elegans

MRTKLDGRI RTQIENGVASGHRSMFAVVGDKARDQVPILYHILSKSTVSARPNVLWCYK  
ELSFSTHRAKKAKMKKATTTISGSLPDADPFDFVISTTQIRYCYNETEKILGNTFGVL  
VLQDFEAMTPNLLARTIETIEGGGMVILLMQSVRSLRQLYTI SMDVHNRYRTEAHNEITA  
RFNRFILSLASCSSVLVLDLQRLVLPISSHIENVEAIPASQKKIQSESDAELASLKEAM  
KETKPIGPLLSRARTACQAKALLRFLDVITEKQSNVTCSLTAGRGRGKSAAVGLSLAGAI  
AFGYTNIFVTSPSPENLKTLEFVVKGFDA LDYQEH TDYELIQSANPEFKNCLVRINVFR  
EHKQTIQYISPTDVQKLGQCELIVIDEAAAIPLPLVKELISGPYISFLSSTINGYEGTGR  
SLSLKLLQQLRQQAAGGAEKGSASNKGKTLHEMHMEESIRYKPGDKIEKWLNRLLCLD  
ATNCQLKLECGTPPPAACELYIVNRDTLFSFHDAEAFLLQVMAIFVSAHYKNSPNDLQOM  
LSDAPAHNLFVLMAPIDKSRKTIPEVLAVVQVLCLEGRLDSDNIQNGLESKRAAGDLLPW  
TVSQQFMDKQFGTL CGGRIVRVAVHPDYQSMGYGGRVQLIEQYYLGLATSLDEEEKAPA  
PPSKTVIKQVKDGHTVELLEERIEPRADLPPLLQRLDERKPERLDYLGVSFGLTVPLLK  
WKRNEFVPVYIRQNSNDITGEHTCIIKLGLEHGGSDSDEEPSATWLPVYWREFRRRIVNL  
LSFDFSSFPQMALSLQLKNKHVEKQMKRLVIERSELAIHLSNTDLRRMSQYGRNMVDS  
HIITDILPIVAKLNFEQRLPQELKLAVTQSAIILLARGLQHKHFEDISKELDLPMNQIFAL  
LTKAIRRIGDWFDEVCE TAVRENLDKEAEASAANKPTSSLPKAVPLANLEDELESAAKEI  
RARHDRDRKALLAELGNE LQKYEIIQDEKELAEAYESVNMKYANKLVSVKSKRTAIQAAI  
PDAKDPANKNAKKKKRFS SGGRR

>S\_carpocapsae

MVRTKLDNRIRTLIENGVATGHRSMFAIVGDKGRDQIVILHHILSKAVVAARPSILWCYK  
KDLGFSSHRKKRMEVQKKLALGKINVREDDPFELFVSSTEIRYCYAESHKILGNTYGM  
LVLQDFEAITPNLLARAIETVEGGGIIVFLLRSVNSLRQLYTMMDVHSRYRTEAHSEIV  
ARFNRFILSLASCNKCAVIDDQNLVLPISSHIKKIEAIPSSSEKSLTKEEEEELKELKMA  
MADSKPIGQLLSKCRNTNCQKVLRLLDVITEKSLKATCSITAARGRGKSAALGLA IAGA  
IGFGYTNVFTVTSPPENLKTLEFIVKGFDA MDYEEHSDYELIQSTNPEFNKALVRINIT  
RDHRQTIQYFHPSDAGMLGQAE LLVVIDEAAAIPLPLVKELISGPYLVFLASTINGYEGTG  
RSLSLKLLQQLREQSSGAAKKTEKGGKLATATARMLHEL SLEESIRYKPGDQIELWLNRI

LCLDATNIHRLISGTPPPKDCELYVNRDTLFSFHKGSEQFLRNMMAINVSAHYKNTPNL  
LQMLSDAPAHHLFVLMGPVRDEQTHLPEILAVVQVCIEGSLTKNSVTSSELRGRRRAAGDL  
LPWTISQQFLDNDFPTLSGARIVRIAVHPDYQSMGYGSRALELLMQYYSGEVSSLSSEKSL  
KSSASSKIRSVEDDKIGLLEEQIAPRPREDLPPLLHRLTERPAERLDYVGVSFGLTVNLL  
KFWKASFPVYLRQTNDLTGEYTCIMLRSLAPQDDESSRDSWLASYWKEFRTRLISLL  
GFEFKFSPHLAISLLQLKNPFVEKQMERKPYSRKELEFLSNTDLKRIAQYARNMIDHH  
LVTDLLPTVSKLYFNEKISDEVKINIVQSAILLGLGLQHKTVDRMVCELEMPANQILALF  
SKTMRRSLSDHFDSCMNALESQIGKKEQVVEGTPKGNVEMEAMPISLEEDLRDAEEDIKR  
RQKRDRAKLESELGKSFKEYAIKGTDEQWANALSTVKLDSAKKSAIITVGSQMEKNSSAI  
EDLTKEAPRSACKNLKRKRKSGGKL

>M\_galloprouncialis

MVRKKIDNRLRILIEINGVAEKHRSMFVVVGDHGRDQVVILHHMLSKATVRARPSVLWCYK  
KELGFSSHRKKRMKQLQKKIKSGKLDVKEDDPFELFVASTNIRYCYAETHKILGQTFGM  
CILQDFEALTPNLLARTIETVEGGGVVILLKTMASLKQLYTMSMDVHARYRTEESHQDVV  
GRFNERFLLSLTSCKNMVIDDQFNMLPVSSHILNIQPVPAKSMEDALSPQEQELRDLKD  
SLQDTQPVGSIVNCKTLDQAKAVLKFEVAISEKTLRSTAVMTAARGRGKSAALGLAIAT  
AVSFGYSNIFVTAPSPENLKTVEFVFKGFDTLEYQEHLDYEIIQSTNPDFNKAIVRANI  
FREHRQTIQYIHPSDSHKLGQAELVCIDEAAAIPPLVKNLLGPYLVFMSSTINGYEGTG  
RSLSLKLVQQLRQQSATFSGSSEVQKAI SMATKSDSVSSATGRALHEIVLND SIRYANGD  
PVEKWLNDLLCLDATNVSRIITSGCPVPECDLYVNRDTLFSYHKASEGFLHRIMALYVS  
SHYKNTPNDLQLLSDAPAHHIFALLGPVDPNQSSLPVLCILQICLEGDISSTIMNSLS  
RGKRASGDLIPWTISQQFQDQDFAGLSGARVVRIATHPDYQSMGYGTRAMNLLQYYKGE  
MISLSETKDIEDNVTVPVDEQDVSLVDERLTTPRKNLPPLLMKLTERRKPEKLDYLGVSFGLT  
AGLLKFWKSKFTPVYLRQTPNDLTGEHSCIMLKMHTEDNPEDRSEPWLAAFWKDFRRR  
FVSLLSYQFRFTFKPSMALNILQEKTFKSTGKKKMSLAELEAHFTKYDVKRELELYAQNMD  
YHLVIDLLPAISRFLFGLIDTHLSVVQSGLLLGLGLQHRTVDELEKELDLPSSQLLGLF  
NRIIRKIVQNLNEILEADVEKDMVARKEITLEPVKQTMDEELV

>A\_californica

MVRKKIDNRIRVMIENGVAQKHRSMVVLVGDGRKQVVILHHMLTKATLKARPSVLWCYK  
KELGFSSHRKKRMKELQKKINSKLSAKEDDPFELFISSTSIRYCYAETHKILGNTYGM  
CVLQDFEALTPNLLARTVETVEGGGVIVLLLRMTSSLKQLYTMTMDVHLRFRTEAHQDVV  
GRFNERFLLSLASCETCVVLDKLNLI PVSTHALALEPLPAKSLEENLTAQEI ELEEELKT  
SIQDMVTTGKI IKLCRTLDQGGQFLKFVDAIVEKTLRSTVVMATAARGRGKSAALGLAMS  
ASVGFYYSNIFVTAPSPENLKTDFDFIFKGF DALDYQEHIDYEIIQSTNPDFNKAVVRVN  
IFRDHRQTIQYIHPSDAHKLGQAELVCIDEAAAIPPLVKNLLGPYLVFMSSTVNGYEGT  
GRSLSLKLVQQLRQQVSTYGGSVKEARLANMAKQGVDSASGRVLHEVELKESIRYASG  
DPVEAWLNRLCLDASSVPRSITGCPPLASCNLYVNRDTLFSYHPASEKFLHRIMALYV  
SSHYNKSPNDLQLLSDAPAHHIFVLLGPVQSANTELPEVLCVLQVSLEGEISKSTIMNSL  
QRGQRGSGDLIPWTLSQQFQDQDFPGLSGARVVRIATHPDYQGMGYGSRALTLMQEYYEG  
KFPNLKESNPDDAQESSNDGGDRGDEELKQVDEEVTLLNEHLAPRKNLPPLLVKLTDR  
RPEPLQYLGVSYGLTSDLFRFWKRSYVYLRQTANELTGEHSCIMVKTISVDEKEDKQ  
SWLPSFWKDFRKRLLVALLAYQFRSFKPALALNILQNKNFKTEEKAVSLRRSELLQFVTY  
DIQRLELYSSNMVDYHLIVDLSLARLFFTNHVP IHLVSVQSSILLALGLQHKTVEDVE  
KDIELPVSQILALLNRTIRKRVQHFNEILEKEVEATMAEKKEIVMEPTLTSVDQELKEAG  
QQFKQEHKQNVATLVGADLSHFAIKGSDKDWQEAIKGNSKSVISVKSHLEKRRKSPA  
EADTDQMSNKKQKKRKKQREKS

>A\_californica

MVRKKIDNRIRVMIENGVAQKHRSMVVLVGDGRKQVVILHHMLTKATLKARPSVLWCYK  
KELGFSSHRKKRMKELQKKINSKLSAKEDDPFELFISSTSIRYCYAETHKILGNTYGM  
CVLQDFEALTPNLLARTVETVEGGGVIVLLLRMTSSLKQLYTMTMDVHLRFRTEAHQDVV  
GRFNERFLLSLASCETCVVLDKLNLI PVSTHALALEPLPAKSLEENLTAQEI ELEEELKT  
SIQDMVTTGKI IKLCRTLDQGGQFLKFVDAIVEKTLRSTVVMATAARGRGKSAALGLAMS  
ASVGFYYSNIFVTAPSPENLKTDFDFIFKGF DALDYQEHIDYEIIQSTNPDFNKAVVRVN  
IFRDHRQTIQYIHPSDAHKLGQAELVCIDEAAAIPPLVKNLLGPYLVFMSSTVNGYEGT  
GRSLSLKLVQQLRQQVSTYGGSVKEARLANMAKQGVDSASGRVLHEVELKESIRYASG  
DPVEAWLNRLCLDASSVPRSITGCPPLASCNLYVNRDTLFSYHPASEKFLHRIMALYV  
SSHYNKSPNDLQLLSDAPAHHIFVLLGPVQSANTELPEVLCVLQVSLEGEISKSTIMNSL  
QRGQRGSGDLIPWTLSQQFQDQDFPGLSGARVVRIATHPDYQGMGYGSRALTLMQEYYEG  
KFPNLKESNPDDAQESSNDGGDRGDEELKQVDEEVTLLNEHLAPRKNLPPLLVKLTDR  
RPEPLQYLGVSYGLTSDLFRFWKRSYVYLRQTANELTGEHSCIMVKTISVDEKEDKQ  
SWLPSFWKDFRKRLLVALLAYQFRSFKPALALNILQNKNFKTEEKAVSLRRSELLQFVTY

DIQRLELYSSNMVDYHLIVDLLSDLARLFFTNHVP IHL SVVQSS ILLALGLQHKTVEDVE  
KDIELPVSQILALLNRTIRKRVQHFNE ILEKEVEATMAEKKEIVMEPTLTSVDQELKEAG  
QQFKQEHLQNVATLVGADLSHFAIKGSDKDWQEAIKGNSKSVISVKSHLEKKRKS PAEAD  
TDQMSNKKQKKRKKQREKS

>O\_bimaculoides

MTRKKIDNRITLIENGVAKKHRTMFVVVADQGHQDQIVVLHMHMLTKAEVKARPSVLWCYK  
KELGFSSHGKRRMRKMQKKIKAGRIATMSEKDADAFELFLASTNIRYCYKETHKILGN  
TYGMCVLQDFEALTPNLLARTVETVEGGGLIVILLRTMNSLKQLYTMTMDVHRSRFRTE SH  
QDVTGRFNERFLLSLTTC SQCLVIDNQYNILPLSSLTSTVTPLPKLSKEESLTQSERELV  
ALKESLQDTQPVGAI INCARTLDQAKGLLKFIDSVSEKTLRNTVVM TAARGRGKSAALGL  
AMATAVGFYSNIFVTS SPENLKTLEFIFKGFVDVLEYQEHIDYEI IQSSNPDFNKAIV  
RVNIFRDHRQTIQYIHPD AHKLGQAELVCIDEAAAIP LPLVKELIGPYLVFMSSTVNGY  
EGTGRSLSLKLIQQLRQQAATFSGTEVKKVTTVESTTNSLSGRALYEVQLNESIRYADGD  
PVEKWLNDLLCLDVTNVRITSGCPLPQDCDLYYVSRDTLFSFHKGSEAF LHRIMSLYVS  
SHYKNTPNDLQMLSDAPAHHIFVLLGPMESTKQALPEVLCVVMQCLEGDISKAAVMSGLR  
QGKRASGDLIPWTISQQFQDNDFASLSGVRVRIATHPDYQKMGYGSRALQLLSQYYKGE  
IVGLNEDVEEVPKDIEPVDEEELDLIVEKVPVRKNLP LLLLK LTERPPEQLDYMGVSFGL  
TADLLKFWKRNGFVPVYLRQTANDLTGEHSCIMLKTLHDKEDESNTLYDKKWL LSFWKDF  
RRRFISLCSYQFRFFSCSTALSILQQKHCKEEAVALAKQELDFKLT VFDLKRLELYSQNM  
IDYHLIMDLMP TIAELYFLQRLPELHL SAVQQALLL GIGLQHKTVD DLEKNLGLAASQLL  
GLYNRIIRKVVQHLNSIVEKSVEQTLVKEHKITMEPVPQSLDDELDAAAVEIKEEMRKKI  
APILEESELSQFAVKGDEDQWNLALSTGKKNFKSISIKSIRQKRQLKEVEENTSQKKSKK  
FKKSKKHK

>L\_anatina

MVRKKIDNRIRIMIENGV AERHRS LFVIVGDHGRDQV VILHMHMLSKAAIKARPSVLWCYK  
KELGFSSHRKRRMRQLQKKIKSGKLDVKEDDPFELFVAATNIRYTYSETHKILGN TFGM  
CVLQDFEALTPNLLARTVETVEGGGLV LLLRTMTSLRQLYTMTMDVHARFRTE SHQD VV  
GRFNERFLLSLASCKRCMVIDDQLNVLPVSSHTLQIQPVPPKTSDDPLPPSEQELKELKE  
SLQDTQPVGVLVDSCKTLDQAKAVLKFVEAISEKTLRSTVSLTAARGRGKSAALGLAIAA  
AVGFGYSNIFVTS SPENLKT VFEFVFKGFDSLEYQEHLDYELVQSTNPEFNNAIVRVNI  
FREHRQTIQYIHPGDAHKLGQAELVCIDEAAAIP LPLVKNLLGPYLVFMASSTVNGYEGTG  
RSLSLKLLQQLRQQNVTFGKQATDQQK GAPGLASATGRILHEISL TESIRYGDGDAVEQ  
WLNEVLCLDASNVRISSGCPVPENC DLYYVNRDTLFSYHKASEAFLQRI MGLYVASHYK  
NTPNDLQMLSDAPAHHIFVLLGPVDPTQNTLPEVLCV LQVCLEGEISKSNIMNSLSRGKR  
ASGDLIPWTISQQFQDHD FQP LSGGRVRIATHPDYQGMGYGTRALEILQHYYEGKIPSL  
VEDAVVEEAVPTVSKDAVGLLEER IAPRKNLP LLLLKLSERPAEKLDYLGVS YGLTAGLL  
KFWKRSGFIPVYLRQTPNDLTGEHSCIMLKV LNEGEKTEQEEESWLMAFWKDFRRRFLSL  
LSYQFRTFHPSLSLSILQQKQCKEKESVISA EELDNYFTKYDLKRLELYSQNMVDYHLIM  
DLLPSIARLHFLNKTGVHISAVQAA I LVSMGLQHKSVEDVEKDMEVPSSQLLGLFN R VIR  
KMVQQFNQIAEEAVEKDMVARKEVIMEPVKNSLDQELGEAAA EAVAKKQKKDLELLK DADL  
SQYTIKGESEGDWENALTKGT KGLLSVKSGVQEKRKSVDSTSF EQQTPGKHKHKKKQKHHK  
H

>N\_vectensis

MVLKKVDNRRLILIENGVQTRHRS LFVVVGDKGRDQV VILHMHMLSKAAVKARPSVLWCYK  
KELGFSSHRKRRMRKQLQKKIKSGTLD MNKDDPFELFVSSSTNIRYCYKETHKILGN TYGM  
CVLQDFEALTPNLLARTVETVEGGGIVVILLRTMSSLKQLYTMSMDVHARYRTE SHQD VV  
GRFNERFILSLSSCKSCMVIDDQLN ILPLTSHSLNIKAVPPKPKKEESLTPSEVELKELKD  
SLQDTQPVGSLINCCRTLDQAKALLKFIEAISEKTLRRTTVSLTAARGRGKSA AIGLALAS  
AVAFGYSNMFVTS SPENLHTLFEFVFKGF DALDYQEHIDYELVQSTNPEFNKAVVRINI  
FRDHRQTIQYIHPSDAHKLGQAELLCIDEAAAIP LPLVKNLLGPYLVFMSSTINGYEGTG  
RSLSLKLLQQLRQQSV PQVTSTKTAEAGGATTAVMGRMLSEV TLEESIRYAPGDAVEKW  
LNKLLCLDATVAQNITGGCPLPESCELYYVNRDTLFSYHKASEVFLQRLMALYVASHYKN  
TPDDLQLLSDAPAHHIFCLLGPVDPSSPALPEVYCVLQVCLEGDISKSTIMSSLSRGKRA  
SGDLIPWTVSQQFNDHEFASLSGGRVRIATHPDVQGMGYGRKALSSLVQYYEGKIPNLS  
ENGQTETSHLGIPTESEADNLLAESITPRANLP LLLLK LGERPAERLDYLGVS YGLTAQL  
LRFWKRSCFVPVYLRQTANDLTGEHSCIMLRILGEIDAEQSDDWL KAYTVDFRRRFLSLL  
SFQFRSFPASLGLSILQDKSLKDHNVLSRAELDFTLTNYDMKRLDMYSRNMVDHHLIMD  
LVPAVARFYFLRKLDISLSAIQSA ILLGVGLQHKTDFDQLEKELELPVGQLLGLFN R ITRK  
VVQHLNSVVEAAIEGEIVKQKDVHMEPLAKSLNQDLEEA AKEME VKQKKELEKLVDF S  
EYAISGKEDDWQEA LSGKGT HNLVSI PSSKRKSLPTSDSGQQKHKHKKSKKHRHSTK

>D\_gigantea

MVLKKIDNRIRVLIENGVQLRHRSLVFI VGDKGRDQVVILHHMLSKATIKARPTVLWCYK  
KELGFSSHRKKRMKQLQKKIKSGTLDLNKDDPFELFISSTNIRYCYYNETHKILGNTYGM  
CIIQDFEALTPNLLARTVETVEGGGIIVVLLRTMTSLKQLYTMTMDVHARYRTEESHQDVV  
GRFNERFILSLSSCKQCMVIDDRLNVLPISSQTLKITPLTPVTKEESVSPNDVELRELKS  
SLEDTPPVGVIVNCKTLDQAKAVLKFI EAI SEKTLRRTTVALTAARGRGKSAALGLAMAA  
AIAFGYSNIFVTPSPENLHTLFEFVFKGFDALDYQEHLDYELVQSTNPEFNKAVVRVNV  
FREHRQTIQYIHPGDSQKLGQAELVVVDEAAAIP LPLVKSLGPLYLVFLSSTINGYEGTG  
RSLSLKLI SQRVQSSGLGTRTTSESKNSNDTNTGSSASRILSEVSLNESIRYSPGDAVE  
DWNHLLCLDATI VPKFSSGCPLPDACDLYVNRDITLFSYHKASEVFLQRIMSLYVSSH  
KNTPNLQLLSDAPAHHIFCLLGPVDPAKKTLPEVFCVIQVCLGEISKSSIMNSLARGK  
RASGDLPWTISQQFNDFEFP SLSGGRIVRIATHPDYQGMGYGKRALQLLIQYYEGKIAD  
LSESTVQPTDQEI QPTDLNESGDLLKETIGPRNNLPPLLLKLNERCAERLDYLGVSYGLT  
NDLLRFWKKSSFVPVYIRQTANELTGEHSCIMLRDLHHVDENGTSGWLLAFWTDFFFFRFL  
SLLSFQFGLFSATLALSVLQNKVFGVSNQGLTQSELYSVLTKYDIKRLDMYSKNLVDYHL  
ITDLLPAVSRLFQKTNFHLSGVQSAIILMGIQLQHKTMEDLEKELQLPVSQLLGLFSRV  
IRKVVKNFNEI LESAVESEMTKEKEIIMEPLAKDLNEELEIEAEI KEKQKEKTEMLKSM  
DLSQYAIAGKDNNDWNEALKGKGPSQMISIASDKPEKRKSLALEESTSSKNKRKKQKKVRT  
G

>E\_muelleri

MSRKKVDNRIRVLIENSVALRHRSMFVVVGDKAKDQVSSQPRGSFVATANTIAFNSSSSH  
RKKRMRQLQKKLKSGLTDTKDDPFELFVAATTIRYCYYSETHKILGSTYGMCVLQDFEAL  
TPNLLARTIETVEGGGMVVFLLKSMASLKQLYTTLMDIHARYRTEAHNDVVGRFNERFLL  
SLGDCSHCMVIDDQLNLLPVSSHMLKLEPVRAKTKEESMTPEQLDLQALKHSLADTQPVG  
VLVECAKTLQAKALLQFVEAI SEKTLRRTTVALTASRGRGKSAALGMAIAAAVAFGYSNI  
FVTSPSPENLKT VFEFVLKGF DALHYVEHEDYEVIQSTNPEFNEAVVRVNI FHEHRQTIQ  
YIHPADSHKLEVASSELLVCIDEAAAIP LPLVKNLLGPLYVFMAS TINGYEGTGRSLSLKLI  
DQVQSSVTVGSASSSGGSAFAGRTLREVTLEEP IRYSGADPVERWLHGLLCLDASSIRR  
VGVGCPPPQDCELYHVNRDITLFSYHKASEEFLHRLMALYVASHYKNTPNDLQLLSDAPRP  
PRLCPPWARGPFHVL PARDPVCAAQFVYVDVSSCDLTRQFADNNFASLSGARVVR IATH  
PDFQSMGYGSRALSLSDYYEGRFPLSEEEADRQSGVVNVALDNDEEGEDGGLMEGGG  
ATGQAAPAVDEL DGAEAQRGWTKPGRGIWNDGKLFKVAPHGSCGFWKKAGYLPVYLRQTE  
NELTGEHSAIMLKALASSSSGSSDWL KAYTIDFRGRFASLLSYQFRQFKPVVALSVLHTA  
SCFDTRSACAYEELTRVLSQQDLKRLDLYSRNMADHHLITDLLPTLAKLYFWSKVPFNLS  
AVQASILLGMGLQHKTVLEVLEKELGLPSSQIMGLFNRSVRKFS SHFTEVVVEGVVGRGIPL  
PTDAGMAPLEHTVDQELSEEVKAFKKKQLDLKEQLE TADLEQYSVSGKEVDWAGVTTDKP  
GIISMARTGHKRLPTKPSHKEKEGKAKRKKQK

>U\_maydis

MRKQLDPRIPTLIRNNVALNHRSFVIVGDKGDQIVNLHFLLSQSRVQSRPNVLWCYKK  
DLGFTTHRKKREKIKNDIKRGIREKGQDPFELFVSLTDIRYCYKDTPKILGQTYGML  
ILQDFEAVTPNMLARTIETVEGGGVVILLKTMSSLRQLYSLGMDVHRNYSNASDDDPV  
ARFNERFLLSLGANPD TLLDDELNVLPLSKAKDIQPLPETSTGAGTGVGSTVRKGERV  
EADEELAELKQVRETKVVGQVVRHAKTLDQAKAVLTILDILASSSLSTTVALTAARGR  
KSAALGLCIAAAVAHGYSNIFVTSPSPENLKT LFEFVFKGLDALGYDEVADWDLQRGTGE  
WKDVVVRVNI FRGHRQTIQYIQPDHQVQLQAELVVIDEAAAIP LPLVRNLMGPYLVFLS  
STINGYEGTGRSLSLKLIQQLRDSARGIADATDADDSTASSKAVRKQAKGGLNTGRAAG  
AALAARSLKEVELKEPI RYSRGDKIESWLHQLLCLDASLTRLSSAALKAKGCPHPSSCDL  
YMNVRDALFSYHPASEVFLQRMMALYVASHYKNSPNDLQLMSDAPGHRLFVLLAPLKGNE  
GGLPEPLCVVQVALEGNISRGVVLNLSRGTREAGDLIPWLVAQQFQDADFASLSGARVV  
RIAVHPDYARMGYGARALQALEAFYSQGLLDVDNVRDDLDDGETFAAVRDRKISKDANLL  
QGDEIRVRDAARMPALLQRLSERRPEQLDWLGVSYGLTPQLFKFWKKAGYTPLVWRQIAN  
DLTGEYTTVQLKSLDTSISTTGSAWLGSLAADFRKRFISLLSYRFREFSTITALTVLEAA  
TQGARLAADDDSLPASSTSLSLGAAELR TLLTPFDMKRLDSYSNNMVEMSVVDLLPTLG  
ALYFNNRLRAVREDEATASAI DAQDDEEELRLSGLQSSLLLAIGLQRKTPDEISAELRLP  
LQQAMALFVKT VRLLVKSLRKVEKRDIVRSMPELSSGLEARAPLRKKANSARGTDQSDDW  
TALKGDLQSELRDAGREFLAGNKESEAYGKLDQEDDHE SKDGADQQEDKEEEGEEQD  
DVDEDDDDDDDELDTAKQKLIDSMDLSKYAIKDGADGANWSQAEAEVANMLRKNNGND  
LKGFN TTVSVKGTKRAADDKVEASPKKAKASNKSGERKKQKRR

>S\_pombe

MPKKALDSRIPTLIKNGCQEKQRSFFVVVGDRARDQVVNLHWLLSQSKVAARPNVLWMYK  
KDLLGFTSHRKKRENKIKKEIKRGIRDPNSEDPFELFCSITNIRYCYKESKILGQTYG  
MLVLQDFEALTPNLLARTIETVEGGGIIVVLLHKLNSLQLYTMSMDIHSRYRTEAHSDV

TARFNERFILSLGNCENCLVIDDELNVLPISGGKNVKALPPTLEEDNSTQNSIKELQESL  
GEDHPAGALVGVTKTLDQARAVLTFVESIVEKSLKGTVSLTAGRGRGKSAALGLAIAAAI  
AHGYSNIFITSPSPENLKTLEFVFKGFDALNYEEHVDYDIIQSTNPAYHNAIVRVNIFR  
DHRQTIQYISPEDSNVLGQAELVVIDEAAAIPPLVLRKLI GPYLVFMASTINGYEGTGRS  
LSLKLQQLREQSRIYSGSGNKSQSHISGRTLKEISLDEPIRYAMGDRIELWLNKLL  
CLDAASYVSRMATQGFPHSECSLYRVSRTLFSYHPISEAFLQRMMSLYVASHYKNSPN  
DLQLMSDAPAHQLFVLLPPVDLKNPKLPDPICVIQLALEGSI SRESIMNSLSRGQRAGGD  
LIPWLISSQFQDENFAALGGARIVRIAVSPEHVKMGYGTAMQQLLHEYFEGKFI SASEEF  
KAVKHSKLRIGDEEIENTALQTEKIHVRDAKTMPLLLKLSELQPEPLHYVGVSYGLTPS  
LQKFWKREGYCLYLRQTANDLTGEHTCVMRLRVEGRDSEWLGAFQNFYRRFLSLLGYQ  
FREFAAITALSVLDACNNGTKYVVNSTSKLTNEEINNVSFESYDLKRLESYSNNLLDYHVI  
VDLLPKLAHLYFSGKFPDSVKLSPVQQSVLLALGLQYKTIDTLEKEFNLP SNQLLAMLVK  
LSKKIMKCIDEIETKIDIEEELGSNKKTESNSKLPEFTPLQQSLEEEELQEGADEAMLALR  
EKQRELINAIIDLEKYAIRGNEEDWKAENQIQKTNGKGARVVS IKGEKRKNSLSDASDKK  
TKEKPSSKKKFRK

>A\_bisporus

MRKQLDPRIPILINNGVKKNHRSFIVLVGDKGRDQIVNLHYLLSQARVSARPSVLWCYKK  
ELGFTSHRKKREAKIKRDVKGIREPNEQNPFIFVTVTDIRYTYKESHKILGNTY GMC  
VLQDFEAITPNLLARTVETVEGGGLIVLLLKTMSLKLQLYTMTMDVHSRYRTSSHDSVIA  
RFNERFILSLGSCDDCLFLDDELNVLPISRGKDI TPLSDTPGKEKEISSELKDKDSLAD  
TKPAGDLVKLSKTIDQAKAILTFIDAIAEKTLSSVTTLTAGRGRGKSAALGLAMAAALAH  
GYSNIFVTSPSPENLKTLEFVFKGLDALGYEEHLDYDIAQSTNPDFNKAIVRVNVFRGH  
RQTIQYIQPEDAHVLGQAELVVIDEAAAIPPLVLRNLIGPYLVFMASTINGYEGTGRSLS  
LKLIIQQLRESTRPSLTKDLAAGTSKDDDSTAATTIASSSKPLSKAPPKSRTLREIKLEI  
PIRYANGDKIEKWLNLGLCLDAAIVPKSIGQCPHPKCELYVNRDRLF SYHPASELFL  
QRMALYVASHYKNPNLQLMSDAPAHHLFVLLPPLKDDNDGGSGGVGNETYLPPELVV  
IQVALEGSISKNVILEGLRAGGDMIPWLISSQFQETFRFGMLSGARVVR IACHPDYA  
NMGYGSRALQTLNSFYSGELFNLDESHTVQSELPPDALVNIDP SDSLLTEKPSIRAVNS  
MPPLLQRLTERKPENLDYLGVSYGLTSPLLRFWK RAGYVPLYLRQTQSDLTGEHTCVMVR  
GLNSSTEPELEWLSEFTKDFRFRFVLSLSYKFREFG SVTALS VLEAAHSGIRAKEGESKD  
EIQANELSLLSPFDSKRLESYANNMLDYHVILDLMP IVAGLYFLKRLGEEVKLTAVQSA  
ILLAVGLQRKSVEDVETELQLPVSQALALFAKL IKKISKRLVDIQKAAISAELPLQSTGV  
VGISRADDGTKEIKEKKATEGWKSVEVLEDELNEAGDEATKRLREKQREMIDALDLQKY  
TIDDVEMDWSSAEAQIRGGGTNGYSTVVS IKSGAEGGKSSGQKRKAVEEAEDDSKSGKE  
AKKTRRGKNRSTSLRLGK

>N\_crassa

MSQKVIDSRIPALIRNGMQEKKRSFFVVG DHSKEAIVHLYYILSNANMKHNKSVLWAYK  
SKLLGFTSHRKKRENKIKKEIKRGVREANSEDPFELFISLNDIRYVYKETE KILGNTY G  
MCILQDFEAMTPNILARTIETVEGGGLVILLKGMNSLKLQLYTLSMDVHSRYRTEAHDDV  
VARFNERFILSLGSCSCLVVDDELNVLPISGGKAVKALPRPTDDEEVNPAKKELEKIKE  
SLEDTQPIGSLVQLARTTDQAKALLTFVDAIAEKTLRNTVTLTAARGR GKSAAMGVAIAA  
AVAYGYSNIFITSPSPENLKTLEFVFKGFDALDYKDHADYSIIQSTNPEFNKAIVRVNI  
HRNHRQTIQYIRPQDAHVLGQAELLVIDEAAAIPPLVKKLMGPYLVFMASTISGYEGTG  
RSLSLKLIKQLREQSRTGAGVKDAVEVDRTSGKAAKDTEVFTGGRSLKEITLSEPIRYA  
QGDVPEKWLNTLLCLDATLPRSKLNTQGC DPDSQCELLHVNRDRLF SFHPVSEKFLQQMV  
ALYVASHYKNPNLQLMSDAPAHFLVLTAPIVEGRLPEPLCVIQVSLEGKISKQSILN  
SLSRGSQPAGDLIPWLVSSQFQDDEFASLSGARVVR IATNPDYVSMGYGSRALQLLDVYY  
EGKFANLSEEAGTVVPKSAPRVTD AELANASLFD DIKVRDMNELPPLFAKLAERRPEPLE  
YIGVSYGLTQPLHKFWKRASFAPVYLRQTPNDLTGEHTCVMRLRPLGDGTDPSWLGFAND  
FHRRFLSLLSYKFRFPAILALTI EESASVGA KLDP SNEPTLEKAELDKLLTPFDHKRL  
ESYANGLLDYHVLDLIP SIAQLFFEGRIRSNLQLSGLQQA ILLAIGLQRKEIDA IAGEL  
TLPSSQLLAIFIKIMRKISTHLASLVEGAI AKEMPQQIGVSAENASAAHDEI IENNFVP  
LDQNLDDLAEGGDQAMKAIRAKQRELIDSLPLDQYEIDGGDAEWKEAEKRVAKATKEGK  
SNPLVSVKTKRKAEPVYEEKSEKRDRGDKKGGKVRHDKRK

>P\_anserina

MFSYLLLAYIAHLDQYQLTFLPHRDSRIPTLIRNGLQEKKRSFFVVG DHAKDAIVHLYY  
IMSSMEVRHNKQVLWAYKNKLLGFTSHRKKRENKIKKEIKRGIREANSEDPFELFISLND  
IRYVYKETE KILGNTY GMLILQDFEAMTPNILARTIETVEGGGLVLLKGMNSLKLQLY  
TMSMDVHSRYRTEAHDDVVARFNERFILSLGSCDSCLVIDDELNVLPISGGKGVKALPPP  
EEDEPLSKTKLELEKIKDSLQDTQPIGSLVKLAKTTDQAKALLTFVDAIAEKTLRNTVTL  
TAARGR GKSAAMGVAIAAAVAYGYSNIFITSPSPENLKTLEFVFKGFDALDYKDHADYS

IIQSTNPDFNKAIVRVNIHRNHRQTIQYFRPQDAHVLGQAELVVIDEAAAIPLPLVKKLM  
GPYLVFMAS TVSGYEGTGRSLSLKLIKQLREQSMTGGNPNNGSGTAEVDRASGKTAKETAG  
IGGRSLKEITLSEPIRYAQGDSVEKWLNTLLCLDATLPRSKLSTQGCPDPSQCELLHVNR  
DTLFSFHPVSEFLQQMVALYVASHYKNSPNDLQLMSDAPAHFLVLTGPISEGRLEPEPL  
CVIQVSLEGGKISRQSILNSLARGSQPAGDLIPWLVSQQFQDDEFASLSGARVVRIATNPD  
YVSMGYGSKALELLVSYEYEGKFANLSEDDDDVTMAQAAPRVTRAELEERGLFDDIKVRDMS  
ELPPLLPNWQRG

>A\_niger

MPRKAIDSRI PALIRNGVQEKRSFFVVGDRAKDVI VHLHYIMSSVDVKQNKSVLWAYK  
KDLLGFTSHRKKREAIKKEVKGIREPNQEDPFELFITLNQIRYVYKETEKILGNTYG  
MCVLQDFEAMTPNLLARTVETVEGGGIVL LLLKGMNSLKQLYTLSMDIHSRYRTEAHDDV  
TARFNERFILSLGSCDSCLVVDDELNVLPI SGGKSVKPLPPPESIDDTNIGTKKELKEIK  
ESLAESQPIGSLVNLARTVDQAKALLTFADAIAEKTLRSTVALTAARGRGKSAALGVAIA  
AAVAHGYSNIFITSPSPENLKTLEFEVFKGFDALGYLDHVDYTI LQSTNPDFNKAIVRVN  
IHRQHRQTIQYIQPQDAHVLGQAELVVIDEAAAIPLPLVKKLMGPYLVFMAS TINGYEGT  
GRSLSLKLIQQLREQSRGGVKVSGEDDIDVADRATGKAAKNIDKSLAGRSLREITLSEPI  
RYAPGDSVEKWLNVKCLDATLPKSRMNTQGTTPHPSQCQLLQVNRDTLFSFHPVSEKFLQ  
QMMALYVASHYKNTPNDLQLMSDAPAHQLFVLVPPIDEEATKLEPEPLCVIQVALEGRISR  
QSVLNSLSRGQRAGGDLIPWLVSQQYQDEDFAGLSGARIVRIATNPEYLSMGYGSRALEL  
LIDFYEGKFTSLSEDIPEPQEEEMVRVTDEELTNSNLLDDNVKVRDIHTMPPLFGKLSERR  
PDALDYVGVSFGLTPSLHKFWKRSSFSPVYLRQTPNDLTGEHSCVMLR TLTSGSNDAAWL  
GAFSRDFHKRFSLLSYQFREFPVLSLSICESANS GAKLDPSISQSPLTKAELDAAFSP  
FDLKR LDSYANNLLDYHVILDMVPTIAEYFSGRLSGKVSLSGVQQSILLAIGLQRKNLD  
TIEKELTLPSSQLLAMFLKIRKVVSTYFRNLI EGAVAETMPAEKAPSARVTTEAHDELDP  
ERFKPLETSLDDELREGGQEVNEELREKQRALIDALPLDKYEINHGSAAWEEAEKQIRSG  
GASTVSVKTSKQTKRKKGESAREIYDQEIDSKRQKI IKKGTEGKKKKH

>S\_cerevisiae

MAKKAIDSRI PSLIRNGVQTKQRSIFVIVGDRARNQLPNLHLYMMSADLKMNFV LWAYK  
KLLGFTSHRKKRENKIKKEIKRGTRVEMDPFESFISNQNIRYVYKESSEKILGNTYG  
MCILQDFEALTPNLLARTIETVEGGGIVVILLKSMSSLKQLYTMTMDVHARYRTEAHGDV  
VARFNERFILSLGSPNCLVVDDELNVLPLSGAKNVKPLPPKEDDELPPKQLELQELKES  
LEDVQPAGSLVSLKTVNQAHAILSFIDAISEKTLNFTVALTAGRGRGKSAALGISIAAAA  
VSHGYSNIFVTSPPENLKTLEFEIFKGF DALGYQEHIDYDI IQSTNPDFNKAIVRVDIK  
RDHRQTIQYIVPQDHQVLGQAELVVIDEAAAIPLPIVKNLLGPYLVFMAS TINGYEGTGR  
SLSLKLIQQLRNQNTSGRESTQTAVVSRDNKEKDSHLHSQSRQLREISLDEPIRYAPGD  
PIEKWLNKLLCLDVTLIK NPRFATRGTTPHPSQCNL FVVNRDTLFSYHPVSENFLEKMMAL  
YVSSHYKNSPNDLQLMSDAPAHKLFVLLPPI DPKDGGRIPDPLCVIQIALEGEISKE SVR  
NSLSRGQRAGGDLIPWLISQQFQDEEFASLSGARIVRIATNPEYASMGYGSRAIELLRDY  
FEGKFTDMSEDVRPKDYSIKRVSDKELAKTNLLKDDVKLRDAKTL PPLLLKLSEQPPHYL  
HYLGVSYGLTQSLHKFWKNSNFVPVYLRQTANDLTGEHTCVMLNVLEGRESNWLVEFAKD  
FRKRFLSLLSYDFHKFTAVQALSVIESKKAQDLS DDEKHDNKELTRTHLDDIFSPFDLK  
RLDSYNNLLDYHVIDMIPMLALLYFGDKMGDSVKLSSVQSAILLAIGLQRKNIDTIAK  
ELNLP SNQTIAMFAKIMRKMSQYFRQLLSQSIEETLPNIKDDAIAEMDGE EIKNYNAAEA  
LDQMEEDLEEAGSEAVQAMREKQKELINSLNLDKYAINDNSEEWAESQKSLEIAAKAKGV  
VSLKTGKRTTEKAEDIYRQEMKAMKKPRKSKKAAN

>D\_discoideum

MVRKKVDTRIRTLIENG VATNHRSFVIVGDNQKQV PNLHYILSKSIVKARPSVLWCYK  
EDLGF SKHKKKMKLKEKSKSSGIDSVNQEDPFDVFI STTNIRYSYSESHKILGNTFGM  
LVLQDFEAITPNLLARTIETVEGGGLIVL LLLKTMDSLKQLYTMTMDVHTRFRSENSKGEV  
VCRFNERFLLSLGKSEQCLVMDDELNIP I SSQSRSIEAKQQILETPEQVELREFKQQVK  
DTDIAGALI ENTKTMDQATALLTFIDSI SEKTLRSTVTLTAGRGRGKSAALGLAISAAVA  
FGYSNIFVSSPTPENLNTLFQFVFKGFD S MEYVEHVDYELVKSTNPEFHDAI IRVNI FR  
HRQTIQYIQPQDYQKLGQAELVVIDEAAAIPLPLVKNLLGPYLVFMSSTINGYEGTGRSL  
SLKLIKQLREQSTVVSNSNKALNSITGRMLREIELNEPIRYSARDPIERWLNELLCLDS  
TIAKSSPTGCPHPSACQLYVNRDTLFSYHKASEAFLQKMVGLFVSSHYKNSPNDLLLMS  
DAPDHHLFVLLGPI DENNTTGLPEILCAVQVSLEGEIAKESILNSIKRGYQASGDLIPWT  
LTQQYQDEDFPRLSGVRIVRIATHPDYQKMGYGSKALELLTQYYQGEITNLDEVNQEEEE  
EDEEKVDQNKGSSKISTVKKDNASLLTEVIRPKSNIPPLLFKLSERKPEKLHYMGVSYGL  
TQQLYQFWSKSKYLPVYLR LTSNDITGEHTC IMLRELNNEQNNTICKDGLWQSFHQDFKK  
RFINLLGYEFRNFNSSIALNILEYKKNNTVAVASSTTKNELTQNEMLLFSSYDLKRLE  
SYSNNIVDYHVVIDLLPSLSKLYFTNKLIKIEDISLIQSAILLALGLQHKTVDNLIGELNL

ASNQVLSLNFQTMRKINTELKQKQEKFIQDSMPKLSIVAPRTGQFKSFKGDIKETDMIPL  
AEDMESELEKGAEEVVNKLKHQLENDSSLSKYLVKGNDEDWSKALKPGSIPNSITIKRKS  
DENEETDKKENNKKSKTKNNNNNNNNNNKKNVNNQKSKK

>P\_polycephalum

MVKKKVD SRLRTLIENGVK TGHRSMFVI VGDNARDQVVNLHLYLVSKASVQARPSVLWCYK  
KDLGFSTNREKRMKQRKAMFRKQADPDMNDPFDLFISSTSIRYTYSESHKVLGNTYGM  
MVLQDFEAITPNLLARTIETVAGGGVIVVILKTM TSLKQLYTMTMDVHNRFRQDESEDDV  
GRFNERFLLSISVCPTCLVIDDELNLPVSSFARTIKPIEGRMVGDE TIAQRELRELKNS  
LKDVHPVSELVGVAKTVDAQAKAIMTFVESITEKTLRSTVVLTAAARGRKSAAALGVAMAAA  
IAFGYSNIFVTPSPENLATA LFEFVFKGFDALEYKEHIDYELLRSTNEQFNKAIVRVNI  
KSHRQTIQYIQPQDYQKLGQAELVVIDEAAAIPLPFVKNNLLGPYLVFLSSTINGYEGTGR  
SLSLKLIKQLREGSAAGNSGGRVLRMCKL TEP IRYTPGDEVEKWLNGLLCLDATVAPP  
IA TGYPDPAVCQLYVNRDTLFSFHKQAETFLQRMVALYVSSHYKNSPNDLLMSDAPGHHL  
FVLLGPVDVTKNALPEIMCVIQVALEGRIVKDAVIAGLARGVRSAGDVIPWTISQQFQDY  
EFGRLSGARIVRIATHPDYHRMGYGTRALELLASYYQGDIIISLNEEDEKEEEEEEEEE  
QGTLLTEAIKPRKLLPPLLTQLSERPPEKLHYMGVSYGVTQLYRFWSKLSFLPVYMRLT  
INETTGENTCVMLRELQNAGLDINAGWLDAFANDFKRRFITLLGFEFRRFPASLALAILK  
KEHYVELESNPNEEVSNEELARKDIKEFFTDYDMKRLHAYA QELVDYHVITDLLPALARFY  
FLDRFGSAKVAPTQAQILIAMGLQYKNVDETSKEMGIPANQVLALFNKSI RRI SRFIRGM  
QEEEEEELEGGKEETTENGTLKEEAKKEEAKKEEGNEEEEDDENKKQVRDSMLESLKLGAY  
SIKGSTDDWKSALKGKTNLSSITLSTKAKGDAQDNKFAKRPNGKKEKPKGQKRSKH

>A\_thaliana

MRKKVDERIRTLIENGVKLRHRSMFVIIGDKSRDQIVNLHHMLSKAVIKCNPSVLWCYKD  
KLDISSHKQKRKSKQLKRLRERGLDPEKLDAFSRLLDVGRVTHCLYKDSERILGNTFGMC  
ILQDFEALTPNLLARTIETVEGGGLVVLILRSLTSLTSLCTMVMVDVHDFRTESSHSEAA  
RFNERFLLSLASCKACVVMDDDELNLP LSSHIRSI TQVPTEK DSEGLSEAERDLKSLKED  
LSDDFPVGLSLIKKCTLDQKAVVTFDDA ILDKALRSIVALIASRGRGKSAALGLAVAGA  
VAAGYSNIYITAPSPDNLKTFFEFVCKGFDAL EYKEHLDYDVVKSANPDFKKA VVRINIF  
KQHRQTIQYIQPHEHEKLSQVELLVIDEAAAIPLPVVKSLLLGPYLVFLSSTVSGYEGTGR  
SLSLKLLQQLDEQSRPATGLESGCLFKKIELTESIRYSGSDPIESWLNGLLCLDVATC  
LPNPACHPSPSQCDLYVNRDTLFSYHKDSELFLQRMALCVSSHYKNSPNDLQLLADAP  
AHHLFVLLGPVDESQNKIPDILCVIQVCELGKISENSALQSLRDGHSPYGDQIPWKFC EQ  
FRDTEFPFGSGARIVRIAVHPNAMKMGYGSAAVELLTRYFEGQIAPISEAEDKVDVEHAP  
IKVTEAAEKVSMLEEQVKPRTNLP LLLVPLHRRRPEKLHYIGVSFGLTLDLFRFWRKHN  
F APFYSAVTGEHTCMLLKLKNDLEVNESDELGFFTPFYKDFKIRFSKLLSDKFKKMDYK  
LAMSVLNPKINFAEVDSSGSSGGFLKTLNGLSPYDMERLRAYTENLTDNFNVYDI CKT  
LAHQYFEEKLPVSLSYVQASILLCLGLQETDFSSIERQMQLERGQIHSLLLKVARELYKY  
LNGVAGKEIKSALPRLKERELTAHNVSVD DDIREGAKQVEEQMKKEKIEGLMDSELQQYV  
IGDKEAEALQHSKISSSGIISVKSTKSENENGFDKSTKKRSSDKRSSSSSKSKSSKKRKS  
LKE

>O\_sativa

MRKKVDERIRTLIENGVRERQRSMFVI VGDKSRDQIVNLNYMLAKSRVKS RPSVLWCYRD  
KLEISSHKKRAKQIKKLMQRGLMDPEKADPFLFLETSDITYCLYKDSERVLGNTFGMC  
ILQDFEALTPNLLARTIETVEGGGLIILLRSLSSLTSLYTMVMVDVHERFRTE SHTQAAA  
RFNERFLLSIASCKSCVVMDDDELNLP ISSHMKFIQPV TNNEDSEGLSERERELKDLKDQ  
FREDFPVGPLIGKFTMDQKAVINFLDSILDKSLRSTVALLAARGRKSAAALGLA IAGA  
IAAGYSNIFVTAPSPENLKT LFDVCKGMNALEYKEHLHYDVVKSADPELKKATI QIN  
VY KQHRQTIQYLKPHDHGKLSQVELLVIDEAAAIPLP IVKSLLLGPYLVFLSSTVNGYEGTGR  
SLSLKLLQQLESQSQPSAPNNGPNSSRLFKKIELNESIRYASGDIESWLN D L LCLDLAN  
SIPNISRLPHPKCEDLYVNRDTLFSYHKESEIFLQRMALYVASHYKNSPNDLQLMADA  
PAHHLFVLLGPVDESQNLPDILCVVQVCELGQISRKSAMKSLSEGRSPSGDQIPWKFC EQ  
QFQDNVFP SLSGARIVRIAVHPSAVRLGYGSAAVDLLTRYEGQMTLFAEDEEENE EPEV  
RITEAAEKASLLEETVKPRANLP LLLVHLRERRPEKLHYLGVSFGLTQELFRFWRKHN  
FY PFYVQGI P SAVTGEHTCMVLRPLNSDDIEVNES SKCGFLDPFYQDFRQRFRRL LGTSFRH  
LNFKLAMS V LASKIDFS DHEPSDYTNITSKILGDM LSPHDMKRLEAYSNNLVDYHLILD  
LVPILAHQYFSEKLPVTLHGAQA AVLFCMGLQDKDIGATKEELGIEREQVLSNFIKTMKK  
LYGYLHNIAGKEIEATL PRLKEIDTAPLKS LDEDLDEAAAREVKEQRR AIDEDD VDPKFLQ  
KYAIDADDDEIEKALNGGKISASGVISVKSNTKADKQEKREKEMKSKRKGNDGEKSESK  
KKRS

>A\_trichopoda

MRKKVDERIRTLIENGVKSRRSMCVI VGDKSRDQIVNLYHILAKSVVKS RPKVLWCYKK



ELFLSSHKKKRMKQLKMMQRGLLDPEKDDPFLVSTSTEIRYCYSETENILGNTFGMC  
ILQDFEALTPNLLARTIETVEGGGLIVLLLLSSLSLSSLYTMVMDVHERFRTEESHSEATA  
RFNERFLLSLASCKACVVMDEELNIPVSSHRSINPVSVKEGSEGLSEGLDLKLNKEQ  
LHDDFPVGPLVKGKRTLDQGKAVITFLDAILEKTLRSTVALTAARGRGKSAALGLAIAGA  
IAAGYSNIFVTAPSPENLKTFLQFVFCNGFDALDYKEHLHYDLVQSTNPDFKKAIVRVNIY  
KQHRQTIQYIQPDHEKLSQVELLVIDEAAAIPLPVVKSLGPLYLVFLSSTVNGYEGTGR  
SLSLKLFQQLQEQQSAVNNESGVSVSGRAFRKIELSESIRYSSGDP IEAWLHGLLCDAT  
NFIPNITGRLPHPNCELYYVNRDTLFSYHKDSETFLQRMALYVASHYKNSPNDLQLMA  
DAPAHHLFVLLGVPVDESKNVLDPILCVIQVLEGQISRASVMKSLSEGYQPSGDQIPWKV  
SEQFQDKVFPPLSGARIVRIAVHPSVLRAGYGSAAVELLIRYYEGQMADMAEIDSEQVEE  
KTPVKITEAAEKVSLLEENIKPRANLPPLLMLRDERRSEKLHYISVSFGLTQQLHNFWSK  
HKFVFPFYIGQIPSAITGEHTCMVLRPLNNDLEVELTGSGKAGFFDPFYQDFRRRFRLLGS  
SFRTLNSALALSILDPKINFGEQAPSEEPSISGILGMKAMLTYPDMERLDAYANNLADYH  
LILDLVPILARLYSEERIPVLSYSQAAVLLCMGLQHQDISYLQGLKQLGKQQILSLFN  
KVIKKIHKYLHNAAAKEIESTLPRLKEVVMTPHKSLEDEDIDEAAREVIEKMKGESELGG  
MLKPELLQOYAIVDREADFEDALLKGERKISSSGLLSVKSNRKNVDKSKLKEKEKGENR  
GVAHSSSRPHKSKA

>N\_colorata

MRKKVDERIRTLIENGVKCHRSMFVIVGDKHHYQIVNLHMMMRQATVKPMTSVLWCYKK  
NLQLSSHQKKRMKQIKKMRQRGLLDVEKEDSYLLFLDSEKIRYCYSETENILGGTYGMC  
VLQDFEGLTPNILARTIETVEGGGLVLLLLSSLSLTSLSLYTMVMDVHKRFRTEAHPCAAS  
RFNERFLLSLALCEACIVMDEELNIPISSHMWSITPVPALGEGGLSESELELKNLKEQ  
LHDDFPVGPLIGKCRITLDQGKAVISFLDAILEKSLRMTVALTAARGRGKSAALGLAIAGA  
VAGGYSNIFVTAPSPENLKTLEFISKGLEALDYKEHTHYELIRNPDYKNATTRVNVFKQ  
HRQTIQYIQPDHEKLSQVELLVIDEAAAIPLPVVTSLGPLYMIFLSSTVNGYEGTGRSL  
SLKLFNSKLEAENHLLAKKDDKLSLGSGLFRKIELNESIRYAVKDP IESWLHGLLCDATNQ  
IPRLNSSGLPPPSECDLYYVNRDTLFSYHKESEIFLQRMALYVSSHYKNSPNDLQLMAD  
APAHHLFVMLGKVDKSNQPLDILCVIQVCLEGQISRESVIKSLSHGSQPSGDQIPWKFS  
EQFQDNAPFSLSGARIVRIAVHPDIVGSRYGSAAVDLVTRYEGQLTNI SEAECDPKYD  
EFENASLKVTEAAEKVSLLEDSEIKRRANLPPLLHVHQERRPEKLHYLGVSFGLTWGLYGF  
WAKNKFAFPYISQIPNAVTEHTCMMLRPLNTDDVELNGANEWGFLDPFYQDFRQRFIRL  
LGSSFRSLHPALALRILEPRVGAKKDIRAEAKEPTSTSNGLGLEATTLTPYDMKRLESY  
TDNRMDFHLILDLPVLSHLFFGSKLPVELDYIHKIILLCIGLQNDFTYVKGVRIP LPC  
REGHRFAKEVQLSGEQITASIFKVMTRIYRYLYGLATKEVESTLPRLREVVMPLPDSRVE  
DDLNDAAKQVVEKMNKEEQDYLLNPDMLKQYVIVGQENEIEAALLKGQGKISSSGVVSVK  
SSRRKEENGKVKFKNGKKRENDRGKFNPKKRKV

>S\_moellendorffii

MRKKVDSRIRTLIENGKSRHRSFLVVVGDKNRDQVVNLHYMLSKAVVKSRSVSVLWCYKK  
DLFLSSHKKKRMKQIKKMMKRGLLDAEKDDPFLVASTSIRYCYAETEKILGNTFGMC  
VLQDFEALTPNLLARTIETVEGGGIILLSSLSLSSLSLTSLSLYTMMDVHSRFRTESHEDVVA  
RFNERFILSLASCKACIFMDEELNIPVSSHVRSISSLPVLEGEGLTESEKDLKELKDS  
LVDTQPAGPLVSKCKTLDQGKAVTFLDAISEKTLRSTVALTASRGRGKSAALGLAIAGA  
VAFGYSNIFVTAPSPENLKTLEFVCKGFDALDYKEHIDYDLVQSTNPAFNKAVRVNIF  
RQHRQTIQYIQPDHAKLAQAELLIIDEAAAIPLPVVKALLGPLYVFMCSSTVNGYEGTGR  
SLSLKLIQQLRSQKSESAVSGRVREVELAEP IRYGAGDPIEGWLHELLCLNAADHIPS  
IEGRLPPPSECRIFYVNRDTLFSYHKASELFLQRMALYVASHYKNTPNDLQLLSDAPAH  
HLFVLLGVPVDETQNTFPDILCVIQVCLEGKISRKSALKSLSDGSSPSGDQIPWKVSQQFQ  
DSEFPPLSGARIVRIAVHPNLKAGYGSAAVNLVRYEGQFTDLEEEDEDDVVHKHPV  
KVAEAAAEISLLEEQIKPRANLPPLLVLHERNAEKVHYVGVSYGLTQQLHNFWKLLKLV  
PVYVSQIPSAITGEHSCVLRPTEIGEVDTATAEQGSWVRPFNEDFSRRFISLLGSTFRS  
FSPGLALSVLKPDIDFDEESQETISTEGILGGKNALLTPYDMKRLESYANNLADYHLIID  
LVPTISRLYFMRTIPVTLASQAAILLCIGLQHDISFVESALDLPRNQVLALFNKSVRK  
LHGQLHKAABAKEIETLPRLREVVMNPHAVSVDEDELEAAAKVKADQKEKVS SMLNPESL  
QHFAIGGNDVDFEAALGGKVPKSGLVSVKSSSENKGEAKRPPQNKQLKNKSSKSR

>P\_Patens

MRKKVDPRIIRMMIENGKSKQRTMFFVVVGDKGRDQVVNLHYMLSKAVVKARPSVSVLWCYKK  
DLFLSSHKKKRMHQIKKMMARGLLDPEKDDPFFALFMASSTNIRYCYADTHKILGNTFGMC  
VLQDFEALQPNLLARTIETVEGGGIILLSSLSLTSLSKLYTMTMDVHARFRTESHGDVVG  
RFNERFILSLAACKSCLVMDDELNPLPLSSHTKSITPLPNLEGEEMLEADKDLKELKDS  
LRDTQPAGLLVQKCRITLDQAKAVITFLDAISEKTLRSTVALTAARGRGKSAALGVAIAGA  
VAFGYSNIFVTAPSPENLKTLEFIFKGFDAEMEYKEHIDYDLVESTNSAFNKAIVRVNIF

RQHRQTIQYIQPKDHEKLAQAELLVIDEAAAIPLPVVKALLGPYLVFLCSTVNGYEGTGR  
SLSLKLIIQQLREQSNKLSNGSTDGGSVPGRTFRELELAEP IRYKAGDPIEAWLNELLCL  
DAANHIPNIEGRLLPHPQECQLYVYVNRDALFSYHKESEMFLQRMALYVASHYKNTPNDLQ  
LMSDAPAHHLFVLLGPVDDTQNRMPDILCVLQVCLEGEISKQSALRSLSEGNLPNGDMIP  
WTISQQFQDPEFSPSLSGARIVRIAVHPSLIRAGYGSHTAVDILSRYYEGQLSDLTELEDDA  
AEPKDSQKLVTEAAESEVSLMEETVKPREDLPSILTLVSRKKPEKLHLYLGVSFGITQALFN  
FWQKRKFVVPVYVRQTPNEITGEHTCIVLKPLQSDDEVEGVAGVSGGWLSPFNQDFRRRFMS  
LLGFQFRMFAPALALSILDPKITFTEQETMVGASTENIRGLTPLLTPYDLKRLESYASN  
LVDYHLILDVPTVARLYFLERLPTSISYQAAIILLCLGLQYHQLEHVEAQLKLPQSQIL  
ALFNKTIIRRLYNQLHKAASKDIEAALPRLREVTMPHETTVEDEDLISGAKKVEADIRSKM  
EENVLDPEKLRFAITGADADFDEALGSGKIPKSGYVSVKSSKRDPGKDDQKQVKGAEKAK  
RKKGADFKRPGGKSKH

>M\_polymorpha

MAGLPSQQPQGAAGRGRGMTVPAWMKVTPAGSPPAASPTSGPPQAHIPGNTPPSGPLP  
PPRMPGLGSPGAPPNYGVPQMQRFPQGGPPQPGQQFMPSSGGQQYRPAAGPPPGMGPPQHGM  
PNMQGMGPQQGMPPSSQPSQYSPSPMQMLPRPPQQPQQSSQGPMSYPPQARPMAGG  
PPPQQQPQPHGMPPSGPGNPGMQPPSSFGFNSSLYPYQAPNSYGMTPPHYQSPMQPQS I  
QPMQSSQPPWPMIPGQSMPPALPQGLQAAAQPPAGASSLPGATALSAQSSVPGPSDWQE  
HTAPDGRYYHNKRTKLSSEWEPVELMTPTERADASTVWKEFTTADGRKYYNKNKTKQSK  
WTMPDEMKLAREQVDKSTATTTSGSSVAEVVPPSVTLGTTPTGTNPVSFLPPAASP KPSV  
IVNPSPVFLTPPVALPIAPPVTTVPAFTSSTPSGIPPSVAALPAESVKEDSVETSAKEEA  
EETSADLEEAKKAMPLTGKINITPFVVEEKPSVAAEPLTYANKTEAKNAFKELLESVHV  
ESDWTWDQAMRVI INDKRYGALKTLGERKQAFNEYLAQRKKLETEEKRLKQKKAREDFLA  
MLEESKELTSSMRWSKALTLFEEDPRLQAVEKDREREELFEDYLVDLERKEREKAREERK  
KNLAEYRSFLESCDYIKANTQWRKVQDKLEDDERC SRLDKIDRLETFOEYIRDLEKEEEEE  
EKKLQKEQLRRKERKRNDRFRNLMEEHKVAAGTLNARTQWRDYLVKIKDRVEYQAVANTS  
GSTPKELFEDFAEELDKQYHEDKVRAKEAMKAGKISVTSTWNFDKFKAAIAEAGDLEAIA  
EPNLKLVFDDLLERAKKDEKEAKKRRMLDDLTDVLRMTKQVTASSKWEECRPLLEETP  
EFRAFTEESSRKKVFEDYVTHLQQRAGEKDRKREKEKEKVGPEVAQNGAKKEKEKEKEKER  
ERRKEKDKDKDKDKDKDKDKKEREREKDKDKEKSKREKEVVDVSETGNHVVHKEEKKK  
DKEREKDRDRERDKDKKYRKRHRSSSEDAGSDREDKDKEDSKRSRRHGIDHKKSSRKV

>C\_braunii

MRKKVDSRIRMLVENGVKTRQRTMFVIVGDKGRDQVVNLHYMLSKAVVKARPTVLWCYKK  
ELYLSSHRKKRLRQIRKMMQRGLIDPEKEDPFLFMASNTNIRYSYYSETHKILGNTFGMC  
VLQDFEALTPNLLARTIETVEGGGAIVLLLSALSLSRLYTLAMDVHARFRTESSHSDVTG  
RFNERFIMSLASCRTCVVMDDELNILPLSSHIRELQPVHQLEGEEGMSEAERELKELKES  
LADTQPIGSLVAKCRTLDQAKAVITFLDAASEKTLRSTVALTAARGRGKSAALGVAIAGA  
IALGYSNIFVTSPSPENLKTLEFVFKGFDAIEYKEHIDYDLVESTNPAFNKAIVRVNVF  
RQHRQTIQYVQPQDNQKLSQAELVVIDEAAAIPLPVVKALLGPYLVFLSSTVNGYEGTGR  
SLSLKLIIQQLREQSAKAGDPASATNGGSEAVVAGSGRVFKEVELSEPIRYAQGDPIEAWL  
HELLCLDAANHIPRISGRLLPHPNECELYVYVNRDTLFSYHKASEVFLQRMALYVASHYKN  
TPNDLLLMSDAPAHHLFVLLGPVDESKNALPDILCVLQVCLEGEISKKSAMKSLAEGNQF  
TGDLPWTISQQYQDSEFPSPSLSGVRIVRIATHPDLVRAGYGSRAIELLARYYEAQMTDLG  
EQEEDDEEEEEKEDLPTDKAKITEKAEAEVSLLETEQVKPRTGLPPLLVS LAERKPEKLHYM  
GVSFGLTQPLLNFWRKMKHVPVYVRQTPNDITGEYTCIMIRPLQSDDELQQSDGEAWGSAM  
WLSPFLEDFKKRFICLLGVSFQKFPALALSILDPKIVFSEQESSEGV RAPGVVSGMAL  
LSPYDMKRLDSYSRNLVDYHLILDVPTIAQLYFLEKIPATVSYGQAAIILLSIGLQROEL  
SEVEKSFATEFPALQQRPTIRW

>C\_reinhardtii

MRKKVDARIRTLIENCAKTRQALLVLVGDGGRDQVVNLHYMLSKASVKARPSVLWCYKK  
ELHLSHKKKRMKQIKKLAQRGLLDPEKEDPFALFVASTNIRYCYHETQNILGNTYGMA  
VLQDFEALTPNLLARS IETVEGGGLVLLLSNLNSLTQLYSMTMDAHSRFRTESSHQDVVG  
RFNERMVLSLASCANCLLLDDELNVLP TSSLI RYIEPLPTNP DGTVVDDPARSARQELGE  
LSGSLADTQPAGALVGR CRTLDQARAVVTF L DAASEKTLRSTVALTASRGRGKSAALGLA  
IAGALALGYSNIFVTAPSPENLR TLEFVFKGLDSL DYKEHIDYDLVESTNPSFGKAVVR  
VNVFRNHRQT VQYIQPQHAKLAQAELLVIDEAAAIPLPVVKQLLGPYLVFLCSTVNGYE  
GTGRSLSLKLIIQQLREQGAKISAGDNKAGSKAAGGADGTAAP IANGTSGRTFREVHLGEP  
IRYAPGDPIESWLHELLCLDAGSHMPKPPRLPHPDCELFVVERDTLFSYHKASEKFLQ  
QMVALFVASHYKNTPNDL LMSDAPAHQLFVLLAPVDQTANTMPN I LAVAQVALEGSISK  
RSAVNSLAKGELPQGDLPWTVVSQQFQDADFPALSGGRVVR IAVHPELGRAGYGSRVLEQ  
LRRYYQGELTSLDEEDDAGGRGGAGAGGSGSGEEDGDEARRRS GADAAANADGDAPLLSE

RLAPRKGLPPLLVLPLSDRKPDRHLHYLGVSYGLTQQLFTFWRKAGYQPLYLRQSASDTTGE  
HTCVMVRPLEHPEVEGTAWLSPFVSDFKGRFTSLLGGAFREMAPALALSILDPQLNWGEE  
EAQRATQAGVVVHRGDGSLDPYDLKRLQAYCSSLVVDYHLVLDLVPPLAAAYLRGRVPVS  
LSYGQAAIMLVLGLQLREVSALLESGLPLSNQVLALFNKAMRKV

>G\_Sulphuraria

MKKKIDARLKTLLLEVSCQNNHRALLVIIGDRGKNQVVNLHYMLSKISNIPKPSVLWCYKK  
ELGFSSHRKKRMKQIKKLAQRGLLDTSRDDPFEIFVSNTHIRYCYAETHKILGNTFGMC  
VLQDFEALTPNILARTVETVQGGGLVLLGTIQSLRQLYTMAMDVHDFRFTQAHKDVVA  
RFNERFMLSLSRCSCLIVDDELNVLPSSPMKEGTFALSDKQEQIKKQQQEWSELKSN  
LEETPILGELISRTKTLDAQALLTFIEAITEKTLRSTIALTAARGRGKSAALGLAVASA  
IGHQYSNIFVTCSPENLKSFFDFVLIGFDALQFKEHVDYEVLQSTDASLQHCVVRINVF  
RSHRQTIQYIDPRDASKALHQAELLVIDEAAAIPLPVKSMLGPYLIFMSSTITGYEGTG  
RSLSLKLFQLRKGAHSDNRPSDFHLAEGGRTFREITLEAPIRYAIGDPIESWLYDVLCL  
EAGKGPQPLIYGCPHPHDCQLYRVNRDALFSGHPLAESFLQTIMALFVSSHYNKSPNDLQ  
LLSDAPAHRLFVLIAPTCKQLDSNGLPQVLCAIQVCLEGGQISKEYAQASMSRGRGAGDL  
IPWTISQQFQDSSFASLSGVRVRIATHPDVQRMGYGSRALTLNDYYSKMI SLTEDGW  
RGTLSDEPSTITNVDNSNDTLNHERLEPRKELPPLLEPLNVPDRVDYLGVSYGLTYELFC  
FWKKQGMVPLYIRLVANEYTGHEHTCIMLKQLPEQSKMSWLSNFFHDFIRRFLALLPFAWS  
SWNPALTLQIIDYGKEYYASHQVTMLNEHMHLLSTFDIQRLEAYAKNLDYHMIVDLL  
PTIAKLYFSGQLDKEIHL SAAQSAILVSVGLQYMDLDRLEKVLNVPAQQLLALLNKMIRK  
FAHYFKELEWSLMESHDASTIITETKTSMKDTNETLEPKQAPLVKKPKKNMEHKDKKEHR  
KHRLE

>C\_crispus

MKKKVDPRIRQCLQEGVNNHRSLIVLVGDKGRDQVVNLHYMLSKMTLQSRPSVLWCYKH  
ELGFSSNKKRMKIKKRIKQGLVDPNRDDPFELFISSTSIRFAYYSESHKILGNTYGM  
VLQDFEALTPNLLARTVETVQGGGLAVILINMMSLKKLYSITMDVHARLRTEAHRKVV  
RFNERFILSLADCPAAIVADDELNVLPISSHVRAMSGEVTSTANRPTTENEPKELKES  
LADTPPIGPLIAKAKTLDQAKALLRFEEAISEKTLRSTVALTASRGRGKSAALGLAVAAA  
VAHDYANIFVTSPPENLRTFFAFLVFGFDAMDYQEHTDYEIIQSTD SGLNNAIVRVNVF  
RSHRQTIQYIDPIDAPRSLQAELLVIDEAAAIPLPVIESMLGPYLVFMCSTITGYEGTG  
RSLSLKLMTKLREGSARVPSQYKGVNGNSNRQSDRDAAAVSSRTGSGRVFREVQMEIP  
IRYQKDPVEAWLYDLLCLEAGGVRQVLTGGAPHPEECELYYVERDALFSRHSASEAFLHRI  
MALFVSSHYNKSPNDLQMLSDAPAHGLFVLLAPTRPDTERLPDVLCAIQVCLEGGKISSKS  
SKTQLSRGQRASGDLIPWTISQQFQEPDFATLSGARVVRVATHPDVQKMGYGTALKLLL  
EYYKGEHNI SLENNVERLSEQNPPAGQENGYTDSEQGDADQKKTLLEIIGPRKNIPP  
LLRRLHERSAENLDYLGVSYGVTTQGLYSFWSRLGFMPYLRLTPNDLTGHEHTCIMATTSV  
CSSEETKPSDWLSKFNQDFRRRFVHLLGYDFRSLPPGLALAILNTGAEFRESGDAEERS  
SIDEIKGLFTPYDRRRLSRSRSLIDYHVILDMIPKLAELYGTGSLGLRDGLRLSPAQNAV  
LMGIGLQRCVDDLEKRLGIQASQVLALLNKVIRKMSTFLRDMEETDIASRIGQTQGARG  
MIPGVTIELPNSNKAFAALSTDDPSDEKGTGPKSLKAEEDGAGATEKGTMSNFKVGGS  
KDEWKAALPKNALADGIPSTVSIKSGKKSKRKTISESKDVGTPRKRKKKQVK

>E\_siliculosus

MVRKKVDARVRSLENGVKSNNHRSTFVLVDHGDKQVVNLHYILSKARVASRPSVLWCYK  
KELGFSTHRKKRMRLKQKKSGLASAGGASEDPFELFVNSTNIRWCYKDTERVLGQTF  
GVLVLQDFEALTPNLLARTIETVEGGGLVILLKTVTSLKQLYAMSMDVHSRFRTESSGD  
VVGRFNERFMLTLGDCKSCLVCDDELNVLPSSHARDIVPLPPVEDAETTEAKELRELK  
ESLEGTTPVGPVLAGAKTLDQARALLTFMEEAISEKTLRSTVALTASRGRGKSAAGLCLA  
GAIAYGYSNIFVTAPSPENLSTVFEFVLKGFLLHFSEHLDYEVIIQSTNPAFNRAVVRIN  
VFKDHRQTIQYIQPHDSEKLSHCELLAVDEAAAIPLPVKSLLGPYLVFLSSTVNGYEGT  
GRALSLKLIDQLRKQGTAAQAARIAASEIHGTGRKKGKEKVHENRWKVAADAAANASK  
HGGGGGGRTLREINLETPIRYGANDPVEAWLYRLLCLDAKVGHHRLVCGTPAPKDCELYY  
VNKDALFSYHTLSEGFLQRVMSLYTSAHYKNQPNDLQMLSDAPAHHLFVLLGPKAMEQGA  
KGNLPDVLVVQVALEGQISRASLEASLSRGRASGDLIPWSLSQQYQDQGFAGLSGAR  
VRIATHTDVQKMGYGSRAIDLTKYYEGGLFSGTGGEEGSEEGSEESSEEESEEEEDDD  
DDDDESSDEEEENGNTANKKKKASAKGGGLSSERLAPRKKLPPLLVSAGERPPERLHWL  
GSSFGVTGQLRLWKRAGFRLVYLRQTTSDLTGHEHTGVMLRALDTEGMKEKPEDGWLASF  
AADRCRIVSLLGHEFQGFDCCTTALSLEVAAPGGAAVEGGEAPAAGGARGAVGARELGY  
CGPHDLKRLGLYSRNLVDYHLITDLLPMVSKLYFLGRMPSTRMSHLQEAILLAMGLQHR  
VTALSKELQLPDNQLALFNKAVRKL CNCLTEVAEKEAEGEMETHLAKKKRLQTVKSAGE  
MSMLPASMEDELEGGAKEAMKKMEGKQFAVMY

>P\_tricornutum

MVRKRLDDRVRALLERSVVTGQRSMLVLVGDHKGDKQVPNLHQILTKCSVQARPKVLWCYK  
KELGFSTHRKMKKLRDKSRGLVGGEADQADNFELFVSQTDITWCYYKDSHRVLGTTV  
GVLVLQDFEALTPNLMARTIETVAGGGLVIFLLRTVKSLKQLYAMSMDVHARYRTE SAGD  
LVPRFNERFILSLGKCPNCLVCDDELNVLPVSRKALNDLSPNAGWSKGDAGEVIVQDTPE  
QRDLKEIQEALLDTPHVGVLVELTKTLDQAKALLVFLEACSEKTLKSTVAMTAARGRGS  
AAMGLCLAGAISLGYSTICVTAPEPENLVSFDFLCRGLKALKYQEHMDYSVTYNSASGR  
EQTKCITAINVHRSHRQVIQYVDP AETDKFTSAEIVAIDEAAAIPLPVVRALMSHPDRLT  
FLSSTINGYEGTGRALRGRHAEMQAASSAANSIVGAKSKKGEAKVHEQRWAAAAAILEA  
SEEIELLTPIRYAHGLDSVEAWLNKLLCLDCGSASNKLKNGGAPAPGDCELYSVDRDALFS  
FHKLSEAFLLQKVMGLYTSAHYKNSPNDLQMLSDAPAHSLFVLLSPSAEQDANSLPDVLT  
VQVALEGRISRKAVEAQLARGHRSAGDLIPWTISQQFGDSKFAQLSGARIVRVAVHPVQ  
GMGYGSRAIELLYRFYNEEMVSLVNDENDDADSDAERNGEESDNDEPTTSGIGILGEN  
LRPRKELPPLLLPLTEVDMPRLDWVGTSFGLTLQLHKFWSRSGMRMLYLRQTKNELTGEH  
SSIMVRALPRRSGVDDSWLYAYLSDARRRFTTLFSGPFRHLDVRLALSVDNMDVPSNTT  
EAKQRAGALAGTLTFKELDYFLTPYDLKRELELYGRNLCDHHLVMDLLPIIGRLYFTGRFG  
SDFNLSVQAALFCGIGLQNKSV DILTRELGLPTNQVLAMFNKAVRKMSIALNSVVEEKE  
KESLLTGEKRSRIEESAQMRHVSRTLDEDAEQAGQEA IATLRANEMANHLPELAHDT  
MLKYVVKGSQKQWEKVLQDKDKREKLLTMTT

>T\_thermophila

MRKKVDQRIQILMENCIKLRQRGFFIIVGDRGKEQVVIHYLLNKMNFKSKPNVLWCYK  
ELGFSTNKQKRMKEIKKLQKGLYDNNVDDPFQLFVTSTQIRYCYKETHKILGQTYQML  
ILQDFEAITPNVLCRTIETVEGGGFVIMLFKTMSSLKQLYTLTMDVHNRRTDQFQDVEP  
RFNERFILSLSKSENTIVMDELNILPISNLIENIKSVSADDSLDSKMTKELEELKESLK  
QNVLVGPFINI AKTLDQARAIMTFIDAITEKNTRATISLTAGRGRGKSAAVGVAIAAAIV  
CGFSNIYVTAPSPENLKTLEFIFNGLEQNNYKENMHYDI IQSTNPDFNNAVIRVNVFKT  
HKQIIQYVSPDFASIGHADLVVIDEAAAIPLVYVKQFLGPHLVFLCSTVNGYEGTGRSL  
SLKLIQQLKQSKMNSSNSEKQTA VSSSGSRILRELTLNDPIRYSNDPIERWLNLL  
CLEASQAVPLKSGLPHPNDCELFMVNRDTLFSYKksteQFLFNLMSLFIS SHYKNSPNDL  
QLLSDAPSHAVFVLMGKIKEGEKKSEMPDILCAVQVALEGKISKETFNQONENRVRPAGD  
LIPWIISEQFQDREFPSLSGVRVRIATHPAAQKMGYGSKSLELLQKFFEGELIDLSNET  
LNRENYFLKAQRTADGEKLLKPLKRLTEIEPPQLHYLGVSFGLSKELFKFWKSGYYPL  
YLRQAKNDITAEHSCIMLKSLLKQNDMENENVQENKYNDQWLKYYSDDFKKRFLQLLSY  
EFKDVDVQLSLGVVDPFTVTDNDNSRLTNDLGLGDKDKNLGNYIMAPISNKEQLENYIN  
TYDLKRLEAYSRLADFYLIIDLLPEISKMLFLNRLQSIKMSYSQCAIFLGLGLQHKTE  
KLARELGIPVSQVMAIFNKGIRKVTQLFRSLFEQEIMKELNFGNSKEALEKMNP IKDNEN  
EIQDAGKEYLKSLLKDNKKDEKEDKSDKLNKKRHARYNFGTEDIDVGNASINQNTGTI  
TIARDSKVALNQDFTNYKSASAAQAAAVKNAKLLKKN

>P\_tetraurelia

MKKKLDSDIQAALVQSGINEHIRSIFVMIGDRSKYQVATMHQLLSKLSMIQKPKVLWCYK  
DLGFTTHKKKRETEIKNQOMKEETQLNEPFLNLFSSNEIRYCYAETQKVLGNTYNMLIL  
QDFEALTPNILCRTVETIAGGGIILFLIKTMSSLKQLYSLTMDIHSRLRTPSFKEVQPRF  
NERFIIISLRCQRCLFVDDDELNLLPVSSTALEKIEQGTPINSNQVADFAQTPNEIAQKL  
IKNCKTLDQAKIILGLIDSLQEKVFRYTTISISAARGRGSAAIGMAAAAALKLGFSNIFV  
TAPSPENLVTFEFLISSLETLDLFRQNQHFDVVIQSTNPDFNNAVIRVNAYKTHRQFVQYI  
QPQDFVKVANNADLVFCDEAAAIPIQFVKSMFGSHLTVLSSSTINGYEGTGRSLSLKLLQK  
LRETKQTGARLLKELQMNDPIRYSNKDIVEKWL YELLLL DADAPKLQKGLPHPNDC  
ELYLCNRDTLFSSQKTSEKFLFNLMSLFIS SHYKNSPNDLQLLSDAPAHAVFVLLGPLPTDK  
TMPDILCAVQVCFEGAIPKDLVDQVTNQQKPSGDLIPWTL SKYYLDNQFPQYSGVRVIRI  
ATHPNAQKMGYGSKAMELLNRFCKGEILDPSAQLIHIDFREQATAEDEKDLIQPKKLLP  
PLLKLLSEVYPPQIDYLGVSFGLTQELYKFWKSNQFSPAYLSLRKNDTTGEYTCIVLRPV  
KDEGSGIDNLCKAFSNDFRNRFINLLGYDFKDLPEYLCIDILKANVTTANVDEDEIEIAKD  
DNIITKEELRQQLSLSDYARLENYCKSMADFYLILDILPSICKIFFAQKCGKAIRMSRTQ  
AALLLGMGLQYKNI ELASEQVDNAVNSLPLFNKAMRMRNF IKMVL DDEQHQRTPKPKQ  
QQQPSKQSVIQKRGKVNYQIDGQIDQEEIQQSLQTGDVVTLGRSKDQAYINYKKKVKLG

>P\_falci parum

MKKKVDNRKILIEENIAVQQRSMFFVVGDEGKNVVVNFYFLLNRLINRTHNILWCYK  
LDFSTSKKKRYREMKKIKKGTFDQTI DNNFDMFLKNADIRFCFYKESKVLGKTY SICI  
LQDFSYITPNILCRCL ETVIGGGLIIFL INKQNELKDLYNLTLNYHKKYTMNGICNVYNN  
YIHRFFLSLNKCEAMFIDDEMNILPLNENYLKIKKITSKSGDNGIGNVTKLKHMEVQ  
KEGEQSGSNINNNDDDDNDNDNYSNSNYSNSNYSNYSHTKSATLGGFLCPDKNLLQEK  
LKFLESICEENEKKEEKKEEKFILYSSKFSRNDTCTKINKNGDIHSSDNKYTRDITYETYSV

TNTSTTANTYNNYI SKKTKKKKDVYSFLDRNIMNLLNICLSLDQLEVLNLMCKILRNDEEK  
KKNIKEVLFNLLANRGRGKSATLGLLLSLSIYFNYSNIIICSGNNEGVTIYDFLTKGLH  
ILGFNEFKDYEKIYDMGKIKEIVIFKNMKYLKQRIFFDIIEEDILNSELMIIDEAACIP  
IDILKKKIKGEITILSTTLNGYEGTGKTFTFKLLKQKFKFITQLSYEEFKNMNPLYFDK  
AYIDLTLTNPRIYSYNDQVEKWLNDFLCLNCNEPTNIKDNICSPSNCELYFVNKNIFKNY  
NRTSEILLKKIMTLFITSHYKNTPNDIIMILDSQQHHLFILINKNNHYNNNNILEDQID  
ELDIYGVLHCAIDGIINNGNVKKTVKLEDIHLVKNNNTQKENPTLDTKEINDSNDQKLE  
KKENINQINSNDNHKELLINEYEGNLIPIIISDYFNYYFYNYIGIRIVRISIHPSMQNLNY  
GSEFLKVKCNYYNEYNKNSKQRHDNNTKQKIKINNNSNNCGDSNNCGDSNNCDDSNNCDDN  
VKYSENIILFNCCNGKNIYFDKLLKQIDYIGTCFGLTKGLLIFWQKNKFIIPVFLKQKNEI  
TGEFSVLMKLDLNEKHLKHIANFYTDFVRSVTKLLPYSFKYMESEIVFNLLHNNNYSIPL  
KQDDAPTIVKDHNTDHTYNHNGHIKNNLHNNHFYDNYEDQHLSFYNNNLINQQTIFYF  
FHTNDICRLKRFVLEGRNFYELIYLLSTIANLILFKKVKIDLSFLEYTILYAVAFQKKT  
KEISDEIKINVNTNAIFRKIIHRFYNYIKDIMEKQIEKEVNAELNEKLVKKKRSNIE  
LPSEYKDELENSLIVKKKLLKKEKLSLMKEFNLEGDIKRKEINIKTNDNLEIKKKKKK  
KKKKKQETN

>T\_gondii

MRKRVDPRVRTLVENCIQLGQRSFFVIIGDRGSEQVNNLHYLLHRYFPAQKPSVLWCYKK  
DLGFSSHRKRKQVKKKIQRGLYDPNIDDPFELFMSSTNVRFCYYKDSHTVLGMTTGMC  
VLQDFEAITPNILCRTVETVQGGGIICLLLRSFASLQQLYDLSDIHGRFKTERFSQVKP  
RFNERFILSLARCRNCLMVDELNVLPLTSFSQTLRSLKPGMQSEAAEGASAGLPPGLPP  
DAAEALAEKKRTEELEALKRDFQETPPAGPLVNLCLSVDQAKAVLAFVDCLAQAASGKK  
DAANCAAADTRGNLSALTHLGQVAHQTFALTAARGRKSAAALGLAVAAAAYDYTNIFV  
SAPSPENVKTLFEFVVKGLTALGLKEHLDFSVSREDPGLAAAAHASHSSGVSSSENSSR  
GGASRLITGVEVHRSHKQKVTFSVHEREGLGHADLLVIDEAASIPLPVKSIFGPYVVL  
LSSTIHGYEGTGRALSKLIIQDLKQNKLSLSSNNPKGGFLARTLQTLTTPIRYSVGDG  
VEAWLHDLCLDADPPKLSDAALPPASKCDLYLVDRLDALFSFHEASEAFHNLLSLFSV  
SHYKNSPNDLMLMADAPAHLLFALLPPVDERTATVPDIYCAVQVSI EGHLSKQAIQQALG  
RGLRPSGDLIPWTLAQQFADEDFGALTGARIVRIACHPSLQRLGYGTAAMQQLIDFFEMK  
GVSLKTEGKNALSNSLLSSSQGGDEEDEDEDEDEDEDEDEDEDEGGTPAKGGKKGDKQAE  
EEQVRDASSAAASASHASSPEAAKVWTKKAFKPRPAPPLSPCRSTRPDFSIDYFGVAFG  
LSSSLFRFWTRRNFPVYVVRQTVTDVTGFEFSCILLRPAEVEGSLWPGESDKTGAADDRGG  
DEDLRRKNRWQGIETGRAANELVGRGGIWL SAFASDFRARFLQLLGGAFRRLPASLALC  
LVTCSKPRDNSEAPGSKETSIFPPLSLANLPNFFSSHDL SRLRKYAQQADLPLILDLL  
PTLAALFFNDRFPPLAASSVTLSHLQOVVLLAVGLQRKTPDDVSTEFNIPPNTLALLNK  
TVHKFVGFQKLQEAQVEAEVDSQWGVRSAA SRRLVVEGGGALLGELPSQSFTTEELADEA  
KKVKRQKVELKNLLEALGGEEMKEHSMDAYTEEDFNEAVGAARPGSLQASTASRVFSL  
KRKNPNKGQKNGGTGEKTDGEGEKKKQKRDFGFSFNKNKNKHKVYANR

>G\_intestinalis

MAQSVRVNSRGEESLKAIDKRLTTLNLSGYESFQRSIIIVGDGGLYQVPLNLSILKMTRT  
SQLSIMWCYDEMPKLSNKRKRNEFRQLKNRGELQEEELSVEAQFYANTNIRYLHYRDT  
ELALGTTVDMLIQDFKALTPNIIGQTVCEVRGGGLIFLLNMMHDLSQLHAVVMNFHSR  
FSNINNREVSNDLHIKARFNSRFIALLEYLPRFLLVNDTLEVIQITEGIQNLMTNLSAQD  
GSVEKRVAAFTAYKNEHSSSLLAKTFISLCATLEQAKLVIQVLEMLDNVDRIRKLADKN  
AMLEKEPVERDGGKPREPSRKRYFVREKETYTREDIAESSVDQDVDAASLEEQNAGHELLQ  
TLTQNANALATATRFPICSLIAARGRKSASLGLIVALMIFQGYNHVLSAPNPINVQTV  
FEFCIIIGLKALDYQEARDYTVRRAGPKATDPIIELRITRKVKQVIAYIMPSTLATYCYAN  
ERASSSILNFIDAILLDECAAIPLKLVQRQIVDNVEANMLCFISSTCYGYEASGRALSCLK  
LHDLERSGSKRGQGLVKSLENEPIRYAPNDSIEKWNQLLCLDQVNGLVTSLEEGPEIAA  
SFPQPQSCTLYRVNKDALFSGLPQSELFLQTIWISIFSASHYKNSPNDLILLSDNPLHEIF  
VLCPPITDSKRIPTVLCACQICYEGKLVKQIVKEALSQQKRLDGDMIAWLLSQFQDVVSF  
SSLSGARVVRIATNASYMRGGYGSHTLELLSSFFKGELLNPTEIKRLEAKKKERIEKLAK  
QKGISINDAQEIEALTPALLQNCCTVYPSDLTWLGVGFGITLDDLNFWRKNQYLPVYIR  
QTRNETTGEHTCLMVRSLKENPFINNFAFSFRSRFLRLRYDFAELPIEIAFKVSWPTNT  
VALAHDADQVAIRAALTKQDVVRLRGFVRHQLDMAVRDLVPIAELIFTEKLSPVSLSH  
ASARIFLIGLMMNRQIDVAQQLGLVSDVAFSQVESIFTKTVEVLLRILEPLVGLGTELG  
AGASK

>T\_vaginalis

MATRIKKQIPKNLLDLSAGISSNHRSLIIVGPHGTDRIPTINTLLQKKMSTNSKVLWC  
YHKELHISSNREKRNRLKQKTQNGTLNEDLATELDLFFANSKQVTFKAYSESHRVLGQT  
FNILVLQDFSSLTPNILARTVETVSGGGLIVLLLDDMQSLNDLYTITMDYQRGMMNRDAFG

KVASRFNARFHNSLKSCKNCIAMTDEFDILDSVTPNFEPDSTISEDADLKEILAQYSKDI  
ESVNERLEEITDEKQKKQVEHERDEKQQILSIVEKALTADQAKTVGKVIDSIKDRQLGKV  
IGITAARGRGKSAAIGLSLAAALALGYSNIFVTAPSIANLTALFEFVIVGLTALGFREGE  
SEDFEVVKSNTPTSSKERPYVTRVNVHLSHGRRQTVQYVRPNMTQYLGQCEILAIDEAAAI  
PLPIVRQLMGPYTTLFSSTVDGYEGTGRALSCLKLFEKQRTMKSRFTQTTLTKPIRYAEG  
DPIEAWLHNNLLLDVHPQECSLIPALSDTEFLINRDALFNRSRGSEELLRALVSLSVES  
HYKNTPNDLTLMADSPNHRIFALINMKTVTGKGIPEIIAFVQVALEGKIGDEQFSNAENG  
KGRRDGDLIPWNIARAFEEPEFAQLTGVRIVRIAVNPEMQKKGYGSVAIEKLVQYYSGHE  
VVDTKIKPNAKTLMPYPLTAIAPEPVDYMGVSFGLTRDLAHFWRKGGFVPLYVVSRETNEVT  
GEHSVIVRPIGETEWLPKFTTEFKSNVYRLLPTIFRDVTPFVIEEIMFPPPPSEKDSGD  
RARLTDIDVKKLSRWSGDGIGAVKHLLLESVCDIFVDNPPIKLTRTEMFALLIMGKQMD  
EEECARLEIQVNQVVALLSAIGKISRYLNKQORGETDSSMNSKIIIEKD

>T\_brucei

MPPPTSVASTARSSSGATIKRKVDDRIRKVIENAVHKRHRALLLVGDRGKDQIVNLHQM  
VSHANHNAKVNVLWCMKKEPDFGSTSLKQOEKARLEVKGGMSTDATKEAFQTFLSQTIIR  
RFCQYKETHKILGQTFGMAVLQDFEAMTPNTLARTIETVKGGGIIVIMFRAMKSLKQLYT  
IAMDVHSRYRTEALQDVVPRFNERFLLSLVDCDTSCLVDDDLNVLPITAKMCAVESARTT  
SYDETLVLQGRQKHEADLAALKERLRASNEVGPLISLCQTLDQGKTILSLMQTVVEKSLN  
TTCVVTAGRGRGKSAALGLATAGAVAQGYSNIFCTAPSPENLQTFEFVVRGLQELGYKE  
RTDFEAMQSTNVEFSKCIIRINVFREHRQTVQYISPNDASKFAQAELAIIDEAAALPLPI  
VKQMLGPYLVFLSSTISGYEGTGRSLSMKLVADMRRKHSNSTNASVAGDDRRLLRELSMSD  
PIRYGPNDPVEFWLNLKLLCLDATVRPIAVKSSPHPNSELYYVNRDALFSYHPLAEQLLQ  
AIVAMLVAHYKNQPNDLQLMSDAPGHHLFILCPSTVDAKSGIPDVFCVIHACEEGHVSS  
EAIKSNLSRGLRPSGDLIPYTLQYYLEEGFAKLAGLRIVRIATNPQLRAGYGSRALEL  
LQYYTGSVSLRPAASAAATENNELKAVDDADEVSSTISHTIKPRKRIPSLLVPLIERP  
YEEIDYLGVSFQVTTPLFNFWKRGGFEPLYLRHAANELTGEHSCVMVRSFGFDLGLLRAE  
FRRRFIPLLAMPFRHLPTLALSLKDVVDNDPQKLAATDLSHVAEHNVRVAGQPQCTW  
KELQEIFISISDLKRLKLNATTFVEGGHVLDLVPALAKLYFESRLFHLPDGAEGVVLSHAQ  
AAVLLGVGLQCQTIIEVGGQAVFSGVPTQQLRAFLQKAI SRIVDHFTRLQKLLTGSKEE  
ETVKRNGGNDADENTHEIYDKEGRVVGLSVEKRVRSVINVDSTLLRDAKSATVGARND  
GGTTGLQRAFKRSKKTRRG

>L\_Major

MVKRKVDDRIKTLIDDIARHKHRGLILLVGDRAKDQVNLHLMISRANHNAKVNVLWCMR  
EDPDFGSTGKKQOEKRRARLEVKGGLSTEASKEAFQTFLAQTNIRFCYKETHKILGQTFG  
MAVLQDFEAINPNTLARTMETVKGGGLIVITFRAMRSLRQLYTIAMDVHARYRTETQRDV  
VPRFNERFLLSLADCDTAMCVDDDLNVLPITHKMKSYGKSCKSDAYNADLAVQGRLOHEV  
DLANVKETLRPSEDVGPLMQLCQTMQAKTVLSLMQTMKRLDSTCVVTAGRGRGKSA  
LGMTIAGAIQGYSNIMCTAPTENVQTLFEFAIRGLKELGYRERTDFEALQGVSEEFK  
CFIRINVFRGHRQTVQFVSATDTAKFAQAELCVIDEAAALPLTLVKRILGPYLVILSSTV  
SGYEGTGRSLSMKLVADMRRGSSSGAADARHLKELSMSDP IRYGPGDPVEKWLNKLLSLD  
ATMENTPLTTSPPHSACELFYVNRDALFSYHPLAEELLQRIQSLVAHYKNQPNDLQLL  
SDAPGHHLFVLCADSVESAAAPTSTSGAARQVDPDIFCVIHACEEGQVSAQSIKSHL  
SHGLRPSGDLIPYTLQYYLEEGFAKLAGLRIVRIATNPALPRAGYGSRALSLHQQYYSG  
SISLTAEPKTAIATHRRGDSEADAREQAGKEHEGDDDESSAPTAMLAPRSHITNLLTPL  
VDRPYELVDYLGVSFGLTTELLNFWKKASYIPLYVRQAPNELTGEHSCVMVVRPMGFDLRP  
LQREFQHRLPLLAMPFRHLPTLALSLVGDFEAHDPKLSAATDLSEVDHHVVRVDGTV  
QATDDIAATFTAGDVQRLRLVSTTFIEGGNVLDLVPVTLAKLYFGKRLFRCPDGTGTVL  
SHAQAAVLLAVGLQCQTTEELAAQAFTGVSTQQLRGLFLKALSRLSEHLVALQKIPQRA  
QRDGHNAGVVAGKRARSLSDGAVGDSAAEDVEDAEVYDSHGKGLKLVARKVKVQVC

### Supplementary data S3

|                                               |                   |                                                    |                                            |
|-----------------------------------------------|-------------------|----------------------------------------------------|--------------------------------------------|
| <b>Figure 2A</b>                              | sgRNA_U13_5-Fwd   | CACCGAGGGAGGTGGGTCGTCGGGT                          | sgRNA_1                                    |
|                                               | sgRNA_U13_5-Rev   | AAACACCCGACGACCCACCTCCCTC                          | sgRNA_1                                    |
|                                               | sgRNA_U13_7-Fwd   | CACCGCCCGTCTGACCTGAACTTCA                          | sgRNA_2                                    |
|                                               | sgRNA_U13_7-Rev   | AAACTGAAGTTCAGGTCAGACGGGC                          | sgRNA_2                                    |
|                                               | Del_U13_UP1       | GGATGTATCGCATTACGGTAGTCACC                         | Genotyping                                 |
|                                               | Del_U13_Down1     | GCAAACACCACTGGTTCCTACACC                           | Genotyping                                 |
| <b>Fig 2B</b>                                 | SNORD13-Rev       | GGTCAGACGGGTAATGTGC                                | Northern                                   |
|                                               | SNORD3-Rev        | GCCGGCTTCACGCTCA                                   | Northern                                   |
| <b>Fig2C</b>                                  |                   | TAATGATCCTTCCGACGGTTCACCTACGGAAACCTTGTTACGACTTTTAC | Mung bean nuclease protection assay        |
|                                               |                   |                                                    |                                            |
| <b>Fig 2D, Fig3C, Fig5G, Fig6C; Supp Fig5</b> | h45 rev primer    | TAATGATCCTTCCGACGGTTCACCTAC                        | Targeted ac4C sequencing                   |
|                                               | h45 fwd primer    | TGTACACACCGCCCGTCGC                                | Targeted ac4C sequencing                   |
| <b>Fig 3A</b>                                 | sgRNA-zU13-6F     | CACCGAATGTAACCACTGCGCAGAA                          | sgRNA_1                                    |
|                                               | sgRNA-zU13-6R     | AAACTTCTGCGCAGTGGTTACATTC                          | sgRNA_1                                    |
|                                               | sgRNA-T7zU13-6F   | GCGTAATACGACTCACTATAGAATGTAACCACTGCGCAGAA          | In vitro transcription                     |
|                                               | sgRNA-zU13-7F     | CACCGGTAGGACGAGAAATAATAAG                          | sgRNA_2                                    |
|                                               | sgRNA-zU13-7R     | AAACCTTATTATTCTCGTCTACC                            | sgRNA_2                                    |
|                                               | sgRNA-T7zU13-7F   | GCGTAATACGACTCACTATAGGTAGGACGAGAAATAATAAG          | In vitro transcription                     |
|                                               | sgRNA-T7_Rev      | AAAAGCACCGACTCGGTGCC                               | In vitro transcription                     |
|                                               | Del zU13-up2      | CATTTTATCTATGAAAGAAAATCG                           | Genotyping                                 |
|                                               | Del zU13-down2    | GCCACAGAACTCAGACATAG                               | Genotyping                                 |
| <b>Fig 3B</b>                                 | zSNORD118-Rev     | GTCAGACAGGATTCATAAAGGTG                            | Northern                                   |
|                                               | zSNORD13-Rev      | CAGACGGTCAATGTGCCACG                               | Northern                                   |
| <b>Fig 5D; Fig5F</b>                          | O_NB_CD1-droso    | GTCGTAACATATTGGTTGGG                               | Northern , primer extension                |
|                                               | ORT_Lh3p          | TCAGAGGAGTTAACCTGCTG                               | Northern                                   |
|                                               | ORT_Lhumile       | CGAGTTAAACCCGTTTCATC                               | Northern                                   |
|                                               | ORT_Amellifera    | GAGAACACGATATTCATC                                 | Northern                                   |
| <b>Fig 6C</b>                                 | C.elegans h34 fwd | CACCATTAGGACTGACAGATTG                             | Targeted ac4C sequencing                   |
|                                               | C.elegans h34 rev | CTAGAGTCTCGCTCGTTATCG                              | Targeted ac4C sequencing                   |
|                                               |                   |                                                    |                                            |
| <b>Sup Fig 2 A/B</b>                          | 5'ITS1-hs         | CCTCGCCCTCCGGGCTCCGTTAATGATC                       | probe1; Northern                           |
|                                               | ITS2b             | CTGCGAGGGAACCCCGAGCCGCGCA                          | probe 2 (mix of ITS2b + ITS2d/e); Northern |

|                    |                         |                                      |                                            |
|--------------------|-------------------------|--------------------------------------|--------------------------------------------|
|                    | ITS2d/e                 | <b>GCGCGACGGCGGACGACACCGGGCGT</b>    | probe 2 (mix of ITS2b + ITS2d/e); Northern |
| <b>Sup Fig 2 C</b> | RNaseH-2                | <b>TGTTACGACTTTTACTTCTCTAGATAGTC</b> | RnaseH mapping                             |
|                    | 3'18S                   | <b>GATCCTTCCGCAGGTTACCTACGG</b>      | RnaseH mapping                             |
| <b>Sup Fig 3B</b>  | zCdh5-F                 | <b>CGAGATTGCTGATGGAGGAACGCC</b>      | Rt-qPCR                                    |
|                    | zCdh5-R                 | <b>TGGCGAGGAGGGCACTGACA</b>          | Rt-qPCR                                    |
|                    | z-fli1a-F               | <b>CCAAACATGACGACCAATGAGA</b>        | Rt-qPCR                                    |
|                    | z-fli1a-R               | <b>GTGATCCGGAGACCACAGAGA</b>         | Rt-qPCR                                    |
|                    | z-bcl2-F                | <b>TCACTCGTTCAGACCCTCAT</b>          | Rt-qPCR                                    |
|                    | z-bcl2-R                | <b>ACGCTTTCACGCACAT</b>              | Rt-qPCR                                    |
|                    | z-bax-F                 | <b>GGCTATTTCAACCAGGGTTCC</b>         | Rt-qPCR                                    |
|                    | z-bax-R                 | <b>TGCGAATCACCAATGCTG</b>            | Rt-qPCR                                    |
|                    | z-puma-F                | <b>GAACACACGGGTTACAAAAGAC</b>        | Rt-qPCR                                    |
|                    | z-puma-R                | <b>GAAAATCCCAGAGTCTGTAAGTG</b>       | Rt-qPCR                                    |
|                    | z-lhx1a-F               | <b>AGTCCGAGAAGAATGCGAAC</b>          | Rt-qPCR                                    |
|                    | z-lhx1a-R               | <b>GGCCGTAGTACTCGCTTGA</b>           | Rt-qPCR                                    |
|                    | z-pax6a-F               | <b>GCATGTTGCCCACTAGTCCT</b>          | Rt-qPCR                                    |
|                    | z-pax6a-R               | <b>CGGGTACAGACACTCCAGGT</b>          | Rt-qPCR                                    |
|                    | z-otx5-F                | <b>GATCAACCTGCCCGAGTCTA</b>          | Rt-qPCR                                    |
|                    | z-otx5-R                | <b>CTTCTTCTGGGTGGTCTGG</b>           | Rt-qPCR                                    |
| <b>Sup Fig 5</b>   | T. thermophila h34 fwd  | <b>AGAAGGGATTGACAGATTGAG</b>         | Targeted ac4C sequencing                   |
|                    | T. thermophila h34 rev  | <b>TTAAGGTCTCGTTCGTTAACG</b>         | Targeted ac4C sequencing                   |
|                    | P. polycephalum h34 fwd | <b>GTATGAAAGTCAAGCTGAAAG</b>         | Targeted ac4C sequencing                   |
|                    | P. polycephalum h34 rev | <b>CGCTCGTTATCGGAATAAAC</b>          | Targeted ac4C sequencing                   |
